# Supplementary material for: Cp*CoIII-catalyzed C2-alkylation of indole derivatives with substituted cyclopropanols
Source: Royal Society of Chemistry journal article supplement (doi:10.1039/d2cc03719j), 2022-01-01
Supplement: d2cc03719j1.pdf [file d2cc03719j1.pdf]

## Supporting Information

# **Cp\*Co<sup>III</sup>-Catalyzed C2-Alkylation of Indole Derivatives with Substituted Cyclopropanols**

*Kuppan Ramachandran and Pazhamalai Anbarasan\**

Department of Chemistry, Indian Institute of Technology Madras, Chennai-600036, India.

---

### **Table of contents**

|                                                                               |    |
|-------------------------------------------------------------------------------|----|
| 1. General Comments                                                           | 2  |
| 2. Analytical Methods                                                         | 2  |
| 3. Optimization: Cobalt(III)-catalyzed alkylation of <b>1a</b> with <b>2a</b> | 3  |
| 4. Typical procedure for the cobalt-catalyzed alkylation of heteroarenes      | 5  |
| 5. Properties of isolated C2-alkylindoles                                     | 5  |
| 6. Mechanistic investigation                                                  | 18 |
| 7. Synthetic application                                                      | 22 |
| 8. Spectral data                                                              | 25 |

## 1. General Comments:

All reactions were carried out in pressure tube under dry nitrogen atmosphere. All the *N*-pyridylindole<sup>1</sup> and cyclopropanol<sup>2</sup> derivatives were synthesized according to the literature procedure. [Cp\*CoI<sub>2</sub>CO],<sup>3a</sup> [Cp\*CoI<sub>2</sub>]<sub>2</sub><sup>3b</sup>, [Cp\*Co(MeCN)<sub>3</sub>](SbF<sub>6</sub>)<sub>2</sub><sup>3c</sup>, and [Cp\*Co(MeCN)<sub>3</sub>](SbF<sub>6</sub>)<sub>2</sub><sup>3d</sup> were synthesized according to the literature procedure. Dry solvents were prepared through standard procedure and stored over using molecular sieves 4Å under N<sub>2</sub> atmosphere. Column chromatography was performed using silica gel (100-200 mesh) and ethyl acetate-hexanes with various percentage of polarity depending on the nature of the substrate as an eluent, unless otherwise specified.

## 2. Analytical Methods:

NMR data were recorded on 400 and 500 MHz spectrometers. <sup>1</sup>H and <sup>13</sup>C NMR spectra were referenced to signals of either deuterated solvents or residual protiated solvents. Infrared spectra were recorded on a Thermo Nicolet iS10 FT and Jasco ATR-IR spectrometer. HRMS were recorded by electron spray ionization (ESI) method on a Q-TOF Micro with lock spray source.

- 
1. Whyte, A.; Torelli, A.; Mirabi, B.; Prieto, L.; Rodríguez, J. F.; Lautens, M. *J. Am. Chem. Soc.* **2020**, *142*, 9510.
  2. Kulinkovich, O. G.; Sviridov, S. V.; Vasilevski, D. A.; Pritytskaya, T. S. *Zh. Org. Khim.* **1989**, *25*, 2244-2245 (*J. Org. Chem. USSR (Engl. Transl.)* **1989**, *25*, 2027).
  3. a) Sun, B.; Yoshino, T.; Matsunaga, S.; Kanai, M. *Adv. Synth. Catal.* **2014**, *356*, 1491.; b) Sun, B.; Yoshino, T.; Matsunaga, S.; Kanai, M. *Chem. Commun.* **2015**, *51*, 4659.; c) Yu, D.-G.; Gensch, T.; Azambuja, F.; Vásquez-Céspedes, S.; and Glorius, F. *J. Am. Chem. Soc.* **2014**, *136*, 17722; d) White, C.; Thompson, S. J.; Maitlis, P. M. *J. Chem. Soc., Dalton Trans.* **1977**, 1654.

### 3. Optimization: Cobalt(III)-catalyzed alkylation of 1a with 2a

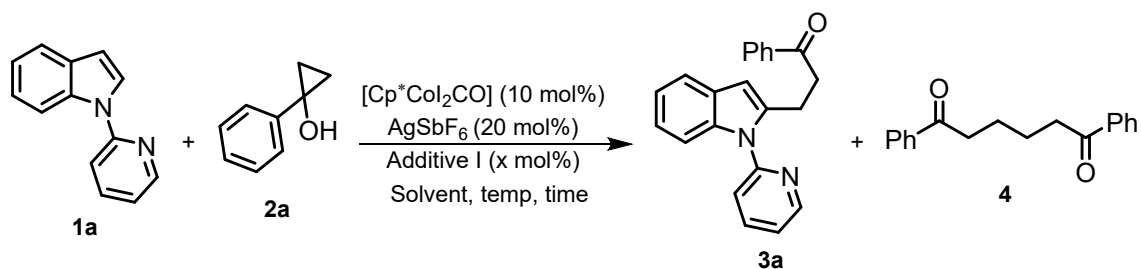

| Entry           | Additive I (x mol%)                                      | Solvent                              | Temp (°C) | Time (h) | Yield 3a/4 (%) |
|-----------------|----------------------------------------------------------|--------------------------------------|-----------|----------|----------------|
| 1               | NaOAc [10]                                               | DCE                                  | 100       | 24       | -/-            |
| 2               | NaOAc [10]                                               | MeOH                                 | 100       | 24       | 19/-           |
| 3               | NaOAc [10]                                               | <sup>t</sup> AmOH                    | 100       | 24       | 25/-           |
| 4               | KOAc [10]                                                | <sup>t</sup> AmOH                    | 100       | 24       | 38/-           |
| 5               | KOAc [50]                                                | <sup>t</sup> AmOH                    | 100       | 24       | 33/-           |
| 6               | KOAc [200]                                               | <sup>t</sup> AmOH                    | 100       | 24       | -/-            |
| 7               | $\text{Cu}(\text{OAc})_2$                                | <sup>t</sup> AmOH                    | 100       | 24       | 23/-           |
| 8               | $\text{Cu}(\text{OAc})_2 \cdot \text{H}_2\text{O}$ [50]  | <sup>t</sup> AmOH                    | 100       | 24       | 58/11          |
| 9               | $\text{Cu}(\text{OAc})_2 \cdot \text{H}_2\text{O}$ [100] | <sup>t</sup> AmOH                    | 100       | 24       | 68/24          |
| 10              | $\text{Cu}(\text{OAc})_2 \cdot \text{H}_2\text{O}$ [200] | <sup>t</sup> AmOH                    | 100       | 24       | 33/48          |
| 11              | $\text{Cu}(\text{OAc})_2 \cdot \text{H}_2\text{O}$ [100] | <sup>t</sup> AmOH                    | 80        | 24       | 29/8           |
| 12              | $\text{Cu}(\text{OAc})_2 \cdot \text{H}_2\text{O}$ [100] | <sup>t</sup> AmOH                    | 50        | 24       | 8/-            |
| 13              | $\text{Cu}(\text{OAc})_2 \cdot \text{H}_2\text{O}$ [100] | <sup>t</sup> AmOH                    | rt        | 24       | -/-            |
| 14              | $\text{Cu}(\text{OAc})_2 \cdot \text{H}_2\text{O}$ [100] | <sup>t</sup> AmOH                    | 100       | 16       | 66/22          |
| 15 <sup>a</sup> | $\text{Cu}(\text{OAc})_2 \cdot \text{H}_2\text{O}$ [100] | <sup>t</sup> AmOH                    | 100       | 24       | 56/18          |
| 16 <sup>b</sup> | $\text{Cu}(\text{OAc})_2 \cdot \text{H}_2\text{O}$ [100] | <sup>t</sup> AmOH                    | 100       | 24       | 45/10          |
| 17 <sup>c</sup> | $\text{Cu}(\text{OAc})_2 \cdot \text{H}_2\text{O}$ [100] | <sup>t</sup> AmOH                    | 100       | 24       | 36/7           |
| 18 <sup>d</sup> | $\text{Cu}(\text{OAc})_2 \cdot \text{H}_2\text{O}$ [100] | <sup>t</sup> AmOH                    | 100       | 8        | 10/-           |
| 19 <sup>e</sup> | $\text{Cu}(\text{OAc})_2 \cdot \text{H}_2\text{O}$ [100] | <sup>t</sup> AmOH                    | 100       | 8        | -/-            |
| 20              | $\text{Cu}(\text{OAc})_2 \cdot \text{H}_2\text{O}$ [100] | <sup>i</sup> PrOH                    | 100       | 24       | 10/5           |
| 21              | $\text{Cu}(\text{OAc})_2 \cdot \text{H}_2\text{O}$ [100] | EtOH                                 | 100       | 24       | 24/5           |
| 22              | $\text{Cu}(\text{OAc})_2 \cdot \text{H}_2\text{O}$ [100] | <sup>t</sup> BuOH                    | 100       | 24       | 21/10          |
| 23              | $\text{Cu}(\text{OAc})_2 \cdot \text{H}_2\text{O}$ [100] | <sup>t</sup> BuOH: <sup>t</sup> AmOH | 100       | 24       | 18/15          |
| 25 <sup>f</sup> | $\text{Cu}(\text{OAc})_2 \cdot \text{H}_2\text{O}$ [100] | MeOH: <sup>t</sup> AmOH              | 100       | 24       | 63/10          |
| 26              | $\text{Cu}(\text{OAc})_2 \cdot \text{H}_2\text{O}$ [200] | MeOH: <sup>t</sup> AmOH              | 100       | 24       | 21/18          |

|                       |                                                     |                    |            |           |           |
|-----------------------|-----------------------------------------------------|--------------------|------------|-----------|-----------|
| 27                    | Cu(OAc) <sub>2</sub> ·H <sub>2</sub> O[10]          | MeOH: 'AmOH        | 100        | 24        | 14/5      |
| <b>28<sup>g</sup></b> | <b>Cu(OAc)<sub>2</sub>·H<sub>2</sub>O[100]</b>      | <b>MeOH: 'AmOH</b> | <b>100</b> | <b>24</b> | <b>80</b> |
| 29                    | Cu(OAc) <sub>2</sub> ·H <sub>2</sub> O[100]         | DMF                | 100        | 24        | -         |
| 30                    | Cu(OAc) <sub>2</sub> ·H <sub>2</sub> O[100]         | DMSO               | 100        | 24        | -         |
| 31                    | Cu(OAc) <sub>2</sub> ·H <sub>2</sub> O[100]         | CH <sub>3</sub> CN | 100        | 24        | 11        |
| 32                    | Cu(OAc) <sub>2</sub> ·H <sub>2</sub> O[100]         | chlorobenzene      | 100        | 24        | -/-       |
| 33                    | Cu(OAc) <sub>2</sub> ·H <sub>2</sub> O[100]         | DCM                | 100        | 24        | -/-       |
| 34 <sup>h</sup>       | Cu(OAc) <sub>2</sub> ·H <sub>2</sub> O[100]         | 'AmOH              | 100        | 24        | -/10      |
| 35 <sup>i</sup>       | Cu(OAc) <sub>2</sub> ·H <sub>2</sub> O[100]         | 'AmOH              | 100        | 24        | -/-       |
| 36                    | AgOAc [20]                                          | 'AmOH              | 100        | 24        | -/-       |
| 37                    | AgNO <sub>3</sub> [20]                              | 'AmOH              | 100        | 24        | -/-       |
| 38                    | Ag <sub>2</sub> CO <sub>3</sub> [20]                | 'AmOH              | 100        | 24        | -/-       |
| 39 <sup>j</sup>       | Cu(OAc) <sub>2</sub> ·H <sub>2</sub> O[100]         | MeOH: 'AmOH        | 100        | 24        | 20/6      |
| 40                    | KOPiv [100]                                         | MeOH: 'AmOH        | 100        | 24        | 41/8      |
| 41                    | Cu(OPiv) <sub>2</sub> [100]                         | MeOH: 'AmOH        | 100        | 24        | 61/9      |
| 42                    | Cu(acac) <sub>2</sub> [100]                         | MeOH: 'AmOH        | 100        | 24        | 11/8      |
| 43                    | AgO <sub>2</sub> CF <sub>3</sub> [100]              | MeOH: 'AmOH        | 100        | 24        | 17/15     |
| 44                    | Cu(TFA) <sub>2</sub>                                | MeOH: 'AmOH        | 100        | 24        | 27/5      |
| 45 <sup>k</sup>       | AgOAc [20]                                          | MeOH: 'AmOH        | 100        | 24        | -/5       |
| 46                    | Cu(OTf) <sub>2</sub> [20]                           | MeOH: 'AmOH        | 100        | 24        | 5/-       |
| 47 <sup>k</sup>       | AgOTf [20]                                          | MeOH: 'AmOH        | 100        | 24        | 24/14     |
| 48                    | Cu(CH <sub>3</sub> CN) <sub>4</sub> BF <sub>4</sub> | MeOH: 'AmOH        | 100        | 24        | -/9       |
| 49 <sup>k</sup>       | AgF [20]                                            | MeOH: 'AmOH        | 100        | 24        | -/17      |

Reaction condition: **1a** (1.0 equiv.), **2a** (2.0 equiv.), [Cp\*CoI<sub>2</sub>(CO)] (10 mol%), Cu(OAc)<sub>2</sub>·H<sub>2</sub>O[100], solvent-MeOH: 'AmOH (2mL), 100 °C. <sup>a</sup> with 20 mol% TEMPO. <sup>b</sup> with 50 mol% TEMPO. <sup>c</sup> with 100 mol% TEMPO. <sup>d</sup> with 20 mol% of benzoyl peroxide. <sup>e</sup> with 20 mol% of H<sub>2</sub>O<sub>2</sub>. <sup>f</sup> [Cp\*CoCl<sub>2</sub>]<sub>2</sub> (10 mol%). <sup>g</sup> **2a** (3.0 equiv). <sup>h</sup> Co(acac)<sub>3</sub> (20 mol%) instead of [Cp\*CoI<sub>2</sub>CO]. <sup>i</sup> CoBr<sub>2</sub> (20 mol%) instead of [Cp\*CoI<sub>2</sub>CO]. <sup>j</sup> [Cp\*Co(CH<sub>3</sub>CN)<sub>3</sub>(SbF<sub>6</sub>)<sub>2</sub>] (10 mol%) instead of [Cp\*CoI<sub>2</sub>CO] and w/o AgSbF<sub>6</sub>. <sup>k</sup> Cu(OAc)<sub>2</sub>·H<sub>2</sub>O (100 mol%).

#### 4. Typical procedure for the cobalt-catalyzed alkylation of heteroarenes:

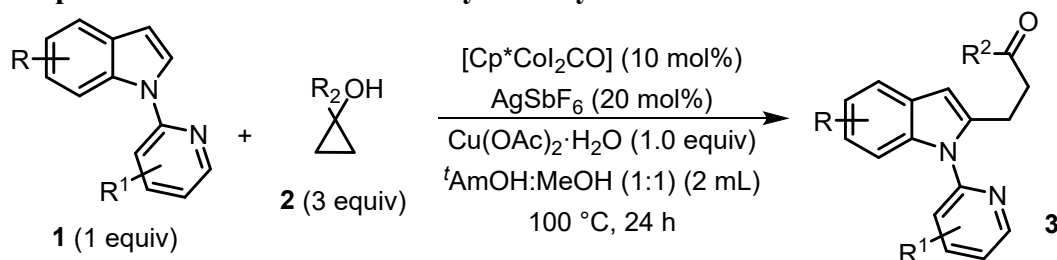

Oven dried sealed tube was charged with indole derivative **1** (0.26 mmol), (1.0 equiv), cyclopropanols **2** (0.78 mmol, 3 equiv),  $[\text{Cp}^*\text{CoI}_2\text{CO}]$  (10 mol%),  $\text{AgSbF}_6$  (20 mol%) and  $\text{Cu}(\text{OAc})_2 \cdot \text{H}_2\text{O}$  (100 mol%). The inner atmosphere was made inert through repeated (thrice) evacuation and refilled with nitrogen. Dry (MeOH: $t\text{AmOH}$ ) (1:1), (2 mL) was added to the reaction mixture and the reaction mixture stirred at  $100\text{ }^\circ\text{C}$  temperature for 24 h. After completion of the reaction (monitored by TLC), the reaction mixture was cooled to room temperature, filtered through a pad of celite, and concentrated to get the crude product. The crude product was purified by column chromatography through silica gel to afford the expected product **3** in good to excellent yield.

#### 5. Properties of isolated C2-alkylindoles

##### 3-(1*H*-Indol-2-yl)-1-phenylpropan-1-one (3a):

Yield: 80%; yellow liquid;  $R_f = 0.50$  in 1:9 EtOAc/Hexane; IR ( $\nu_{\text{max}}$ ,  $\text{cm}^{-1}$ ): 3055, 2900, 1683, 1469, 1261, 972, 750;  $^1\text{H}$  NMR (400 MHz,  $\text{CDCl}_3$ ,  $24\text{ }^\circ\text{C}$ ):  $\delta$  8.63 (dd,  $J = 4.9, 1.9$  Hz, 1H), 7.95-7.87 (m, 3H), 7.66 (s, 1H), 7.54 (t,  $J = 8.2$  Hz, 1H), 7.47-7.40 (m, 3H), 7.33 (m, 1H), 7.17 (m, 2H), 6.41 (s, 1H), 3.37 (t,  $J = 9.4$  Hz, 2H), 3.22 (t,  $J = 9.7$  Hz, 2H);  $^{13}\text{C}\{^1\text{H}\}$  NMR (100 MHz,  $\text{CDCl}_3$ ,  $24\text{ }^\circ\text{C}$ ):  $\delta$  199.0, 151.5, 149.8, 140.4, 138.5, 137.4, 136.9, 133.2, 128.7, 128.6, 128.2, 128.1, 122.3, 122.0, 121.2, 120.8, 120.1, 110.2, 102.5, 38.3, 22.2; HRMS: (ESI)  $m/z$  calcd. for  $\text{C}_{23}\text{H}_{18}\text{N}_2\text{O}$ , 327.1492  $[\text{M}+\text{H}]^+$ ; found 327.1494.

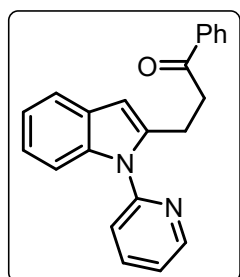

##### 3-(5-Methyl-1-(pyridin-2-yl)-1*H*-indol-2-yl)-1-phenylpropan-1-one (3b):

Yield: 69%; yellow liquid;  $R_f = 0.50$  in 1:9 EtOAc/Hexane; IR ( $\nu_{\text{max}}$ ,  $\text{cm}^{-1}$ ): 3006, 2886, 1675, 1471, 1275, 970, 758;  $^1\text{H}$  NMR (500 MHz,  $\text{CDCl}_3$ ,  $24\text{ }^\circ\text{C}$ ):  $\delta$  7.88-7.79 (m, 3H), 7.47 (t,  $J = 8.4$  Hz, 1H), 7.36 (t,  $J = 7.8$  Hz, 3H), 7.30-7.20 (m,

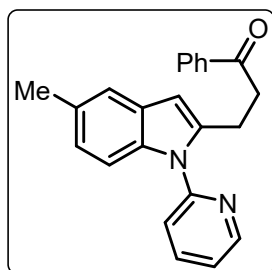

2H), ), 7.15 (d,  $J = 8.0$  Hz, 1H) 6.88 (d,  $J = 7.7$  Hz, 1H) 6.33 (s, 1H), 3.35-3.27 (m, 2H), 3.24-3.14 (m, 2H), 2.35 (s, 3H);  $^{13}\text{C}\{^1\text{H}\}$  NMR (100 MHz,  $\text{CDCl}_3$ , 24 °C):  $\delta$  199.1, 140.4, 138.5, 136.8, 135.7, 133.6, 133.2, 130.1, 128.9, 128.6, 128.2, 123.4, 119.9, 109.9, 102.2, 38.3, 22.3, 21.5; HRMS: (ESI)  $m/z$  calcd. for  $\text{C}_{23}\text{H}_{20}\text{N}_2\text{O}$ , 341.1648  $[\text{M}+\text{H}]^+$ ; found 341.1643.

### 1-Phenyl-3-(5-phenyl-1-(pyridin-2-yl)-1H-indol-2-yl)propan-1-one (3c):

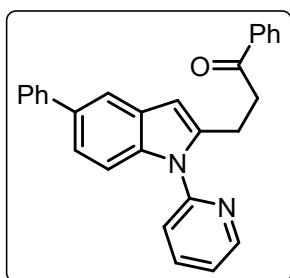

Yield: 68%; yellow liquid;  $R_f = 0.50$  in 1:9 EtOAc/Hexane; IR ( $\nu_{\text{max}}$ ,  $\text{cm}^{-1}$ ): 3007, 2860, 1683, 1468, 1256, 755;  $^1\text{H}$  NMR (400 MHz,  $\text{CDCl}_3$ , 24 °C):  $\delta$  8.65 (d,  $J = 4.8$  Hz, 1H), 7.97-7.90 (m, 3H), 7.78 (s, 1H), 7.64 (d,  $J = 7.5$  Hz, 2H), 7.58-7.50 (m, 2H), 7.49-7.38 (m, 6H), 7.37-7.28 (m, 2H), 6.54 (s, 1H), 3.41 (t,  $J = 9.0$  Hz, 2H), 3.26 (t,  $J = 9.3$  Hz, 2H);  $^{13}\text{C}\{^1\text{H}\}$  NMR (100 MHz,  $\text{CDCl}_3$ , 24 °C):  $\delta$  199.0, 151.4, 149.9, 142.5, 141.1, 138.7, 136.9, 136.8, 134.4, 133.3, 129.2, 128.8, 128.7, 128.2, 127.5, 126.5, 122.4, 121.7, 121.2, 118.7, 110.6, 102.8, 38.3, 22.3.; HRMS: (ESI)  $m/z$  calcd. for  $\text{C}_{28}\text{H}_{22}\text{N}_2\text{O}$ , 403.1805  $[\text{M}+\text{H}]^+$ ; found 403.1816.

### 3-(5-Methoxy-1-(pyridin-2-yl)-1H-indol-2-yl)-1-phenylpropan-1-one (3d):

Yield: 84%; yellow liquid;  $R_f = 0.50$  in 1:9 EtOAc/Hexane; IR ( $\nu_{\text{max}}$ ,  $\text{cm}^{-1}$ ): 2994, 1683, 1582, 1438, 1275, 760;  $^1\text{H}$  NMR (400 MHz,  $\text{CDCl}_3$ , 24 °C):  $\delta$  8.62 (dd,  $J = 8.6, 2.0$  Hz, 1H), 7.94 (dd,  $J = 8.3, 1.1$  Hz, 1H), 7.88 (dt,  $J = 7.8, 2.0$  Hz, 1H), 7.55 (dt,  $J = 7.5, 1.5$  Hz, 1H), 7.47-7.43 (m, 3H), 7.30 (dd,  $J = 7.3, 1.0$  Hz, 1H), 7.25 (d,  $J = 8.6$  Hz, 1H), 7.04 (d,  $J = 2.4$  Hz, 1H), 6.79 (dd,  $J = 8.9, 2.4$  Hz, 1H), 6.42 (s, 1H), 3.85 (s, 3H), 3.39 (t,  $J = 9.2$  Hz, 2H), 3.26 (t,  $J = 9.0$  Hz, 2H);  $^{13}\text{C}\{^1\text{H}\}$  NMR (100 MHz,  $\text{CDCl}_3$ , 24 °C):  $\delta$  199.1, 154.9, 151.5, 149.8, 140.9, 138.5, 136.8, 133.2, 132.5, 128.7, 128.2, 122.1, 120.9, 111.5, 111.1, 102.4, 102.3, 55.9, 38.4, 22.4; HRMS: (ESI)  $m/z$  calcd. for  $\text{C}_{23}\text{H}_{19}\text{N}_2\text{O}_2$ , 357.1698  $[\text{M}+\text{H}]^+$ ; found 357.1605.

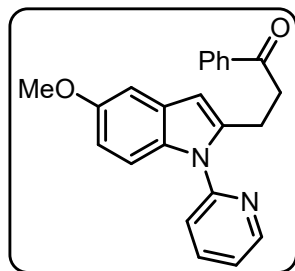

### 3-(5-Chloro-1-(pyridin-2-yl)-1H-indol-2-yl)-1-phenylpropan-1-one (3e):

Yield: 63%; yellow liquid;  $R_f = 0.50$  in 1:9 EtOAc/Hexane; IR ( $\nu_{\text{max}}$ ,  $\text{cm}^{-1}$ ): 3006, 2965, 1680, 1585, 1439, 1254, 755; IR ( $\nu_{\text{max}}$ ,  $\text{cm}^{-1}$ ): 2994, 1683, 1582, 1438, 1275, 760.  $^1\text{H}$  NMR (400 MHz,  $\text{CDCl}_3$ , 24 °C):  $\delta$  8.62 (dd,  $J = 8.6, 2.0$  Hz, 1H),

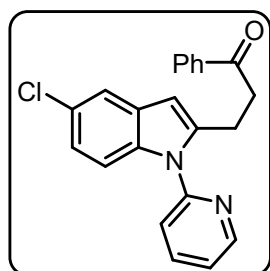

7.94 (dd,  $J = 8.3$ , 1.1 Hz, 1H), 7.88 (dt,  $J = 7.8$ , 2.0 Hz, 1H), 7.55 (dt,  $J = 7.5$ , 1.5 Hz, 1H), 7.47-7.43 (m, 4H), 7.30 (dd,  $J = 7.3$ , 1.0 Hz, 1H), 7.25 (d,  $J = 8.6$  Hz, 1H), 7.04 (d,  $J = 2.4$  Hz, 1H), 6.79 (dd,  $J = 8.9$ , 2.4 Hz, 1H), 6.42 (s, 1H), 3.85 (s, 2H), 3.26 (t,  $J = 9.0$  Hz, 2H);  $^{13}\text{C}\{^1\text{H}\}$  NMR (100 MHz,  $\text{CDCl}_3$ , 24 °C):  $\delta$  199.1, 154.9, 151.5, 149.8, 140.9, 138.5, 136.8, 133.2, 132.5, 128.7, 128.2, 122.1, 120.9, 111.5, 111.1, 102.4, 102.3, 55.9, 38.4, 22.4; HRMS: (ESI)  $m/z$  calcd. for  $\text{C}_{22}\text{H}_{18}\text{ClN}_2\text{O}$ , 361.1102  $[\text{M}+\text{H}]^+$ ; found 361.1112.

### 3-(5-Bromo-1-(pyridin-2-yl)-1H-indol-2-yl)-1-phenylpropan-1-one (3f):

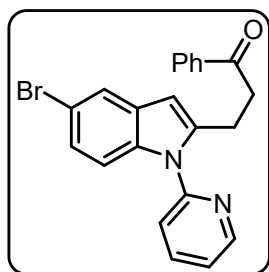

Yield: 65%; yellow liquid;  $R_f = 0.50$  in 1:9 EtOAc/Hexane; IR ( $\nu_{\text{max}}$ ,  $\text{cm}^{-1}$ ): 3007, 2862, 1683, 1466, 1265, 988, 756;  $^1\text{H}$  NMR (400 MHz,  $\text{CDCl}_3$ , 24 °C):  $\delta$  8.64 (d,  $J = 4.8$  Hz, 1H), 7.96-7.89 (m, 3H), 7.67 (s, 1H), 7.55 (t,  $J = 7.9$  Hz, 1H), 7.49-7.42 (m, 3H), 7.35 (t,  $J = 7.7$  Hz, 1H), 7.22-7.16 (m, 2H) 6.42 (s, 1H) 3.38 (t,  $J = 7.9$  Hz, 2H), 3.23 (t,  $J = 9.0$  Hz, 2H);  $^{13}\text{C}\{^1\text{H}\}$  NMR (100 MHz,  $\text{CDCl}_3$ , 24 °C):  $\delta$  198.7, 150.9, 149.9, 141.7, 138.7, 136.7, 136.1, 133.3, 130.3, 128.7, 128.1, 124.7, 122.6, 121.3, 113.9, 111.7, 101.8, 38.0, 22.4, 20.1; HRMS: (ESI)  $m/z$  calcd. for  $\text{C}_{22}\text{H}_{17}\text{BrN}_2\text{O}$ , 405.0597  $[\text{M}+\text{H}]^+$ ; found 405.0605.

### 3-(6-Chloro-1-(pyridin-2-yl)-1H-indol-2-yl)-1-phenylpropan-1-one (3g):

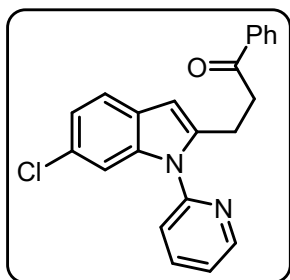

Yield: 73%; yellow liquid;  $R_f = 0.50$  in 1:9 EtOAc/Hexane; IR ( $\nu_{\text{max}}$ ,  $\text{cm}^{-1}$ ): 3008, 1678, 1545, 1477, 1223, 751;  $^1\text{H}$  NMR (400 MHz,  $\text{CDCl}_3$ , 24 °C):  $\delta$  8.56 (s, 1H), 7.87-7.80 (m, 3H), 7.46 (t,  $J = 8.3$  Hz, 1H), 7.39-7.30 (m, 4H), 7.26 (s, 1H), 7.19-7.10 (m, 2H), 6.35 (s, 1H), 3.28 (t,  $J = 7.8$  Hz, 2H), 3.13 (t,  $J = 8.9$  Hz, 2H);  $^{13}\text{C}\{^1\text{H}\}$  NMR (100 MHz,  $\text{CDCl}_3$ , 24 °C):  $\delta$  198.7, 150.8, 150.0, 141.1, 138.8, 138.2, 136.7, 133.3, 128.7, 128.1, 127.4, 124.0, 122.7, 121.3, 115.5, 113.3, 102.3, 37.9, 22.1; HRMS: (ESI)  $m/z$  calcd. for  $\text{C}_{22}\text{H}_{18}\text{ClN}_2\text{O}$ , 361.1102  $[\text{M}+\text{H}]^+$ ; found 361.1067.

### 3-(6-Bromo-1-(pyridin-2-yl)-1H-indol-2-yl)-1-phenylpropan-1-one (3h):

Yield: 77%; yellow liquid;  $R_f = 0.50$  in 1:9 EtOAc/Hexane; IR ( $\nu_{\text{max}}$ ,  $\text{cm}^{-1}$ ): 2990, 1689, 1567, 1470, 1234, 755;  $^1\text{H}$  NMR (400 MHz,  $\text{CDCl}_3$ , 24 °C):  $\delta$  8.56 (s, 1H), 7.87-7.80 (m, 3H), 7.46 (t,  $J = 8.3$  Hz, 1H), 7.39-7.30 (m, 4H), 7.26 (s, 1H), 7.19-7.10 (m, 2H), 6.35 (s, 1H), 3.28 (t,  $J = 7.8$  Hz, 2H), 3.13 (t,  $J =$

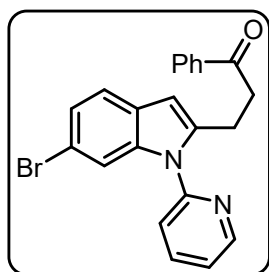

8.9 Hz, 2H);  $^{13}\text{C}\{^1\text{H}\}$  NMR (100 MHz,  $\text{CDCl}_3$ , 24 °C):  $\delta$  198.7, 150.8, 150.0, 141.1, 138.8, 138.2, 136.7, 133.3, 128.7, 128.1, 127.4, 124.0, 122.7, 121.3, 115.5, 113.3, 102.3, 37.9, 22.1; HRMS: (ESI)  $m/z$  calcd. for  $\text{C}_{22}\text{H}_{17}\text{BrN}_2\text{O}$ , 405.0597  $[\text{M}+\text{H}]^+$ ; found 405.0568.

### 3-(4-Bromo-1-(pyridin-2-yl)-1H-indol-2-yl)-1-phenylpropan-1-one (3i):

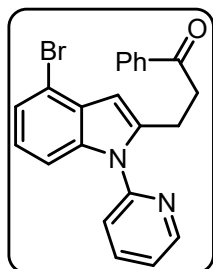

Yield: 52%; yellow liquid;  $R_f$  = 0.50 in 1:9 EtOAc/Hexane; IR ( $\nu_{\text{max}}$ ,  $\text{cm}^{-1}$ ): 3003, 1682, 1580, 1460, 1272, 941, 756;  $^1\text{H}$  NMR (400 MHz,  $\text{CDCl}_3$ , 24 °C):  $\delta$  8.56 (s, 1H), 7.90-7.80 (m, 3H), 7.47 (t,  $J$  = 7.6 Hz, 1H), 7.32-7.25 (m, 1H), 7.20 (d,  $J$  = 7.6 Hz, 1H), 7.15 (d,  $J$  = 8.5 Hz, 1H), 6.46 (s, 1H), 3.34 (t,  $J$  = 8.4 Hz, 2H), 3.14 (t,  $J$  = 8.8 Hz, 2H);  $^{13}\text{C}\{^1\text{H}\}$  NMR (100 MHz,  $\text{CDCl}_3$ , 24 °C):  $\delta$  198.7, 150.9, 149.9, 141.2, 138.7, 137.6, 136.7, 133.3, 129.2, 128.7, 128.1, 123.6, 122.8, 121.4, 114.0, 109.5, 102.3, 37.9, 22.1; HRMS: (ESI)  $m/z$  calcd. for  $\text{C}_{22}\text{H}_{18}\text{BrN}_2\text{O}$ , 405.0597  $[\text{M}+\text{H}]^+$ ; found 405.0605.

### Methyl 2-(3-oxo-3-phenylpropyl)-1-(pyridin-2-yl)-1H-indole-5-carboxylate (3j):

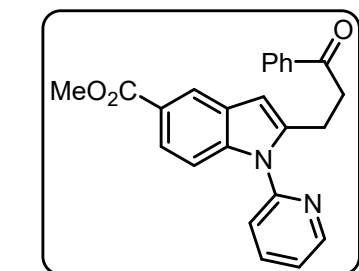

Yield: 55 %; yellow liquid;  $R_f$  = 0.50 in 1:9 EtOAc/Hexane; IR ( $\nu_{\text{max}}$ ,  $\text{cm}^{-1}$ ): 2937, 1685, 1583, 1468, 1262, 755;  $^1\text{H}$  NMR (500 MHz,  $\text{CDCl}_3$ , 24 °C):  $\delta$  8.67 (dd,  $J$  = 4.8, 1.7 Hz, 1H), 8.00 (t,  $J$  = 0.9 Hz, 1H), 7.98-7.92 (m, 3H), 7.83 (dd,  $J$  = 7.8, 1.3 Hz, 1H), 7.59-7.54 (m, 2H), 7.51 (dt,  $J$  = 8.0, 1.1 Hz, 1H), 7.45 (t,  $J$  = 7.8 Hz, 2H), 7.39 (dt,  $J$  = 7.5, 0.9 Hz, 1H), 6.53 (s, 1H), 3.88 (s, 3H), 3.42 (t,  $J$  = 8.1 Hz, 2H), 3.27 (t,  $J$  = 9.0 Hz, 2H);  $^{13}\text{C}\{^1\text{H}\}$  NMR (100 MHz,  $\text{CDCl}_3$ , 24 °C):  $\delta$  198.7, 168.2, 150.1, 144.1, 138.9, 136.8, 136.7, 133.4, 132.4, 128.7, 128.2, 123.6, 122.9, 122.1, 121.6, 111.7, 102.7, 52.0, 37.9, 22.2; HRMS: (ESI)  $m/z$  calcd. for  $\text{C}_{24}\text{H}_{20}\text{N}_2\text{O}_3$ , 385.1547  $[\text{M}+\text{H}]^+$ ; found 385.1554.

### 1-Phenyl-3-(1-(pyridin-2-yl)-5-(thiophen-2-yl)-1H-indol-2-yl)propan-1-one (3k):

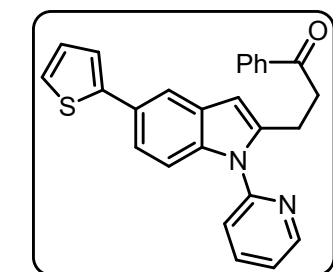

Yield: 49 %; yellow liquid;  $R_f$  = 0.50 in 1:9 EtOAc/Hexane; IR ( $\nu_{\text{max}}$ ,  $\text{cm}^{-1}$ ): 2990, 2857, 1683, 1587, 1470, 1261, 751;  $^1\text{H}$  NMR (400 MHz,  $\text{CDCl}_3$ , 24 °C):  $\delta$  8.64 (d,  $J$  = 4.7 Hz, 1H), 7.96-7.86 (m, 3H), 7.77 (s, 1H), 7.54 (t,  $J$  = 8.0 Hz, 1H), 7.51-7.26 (m, 8H), 6.50 (s, 1H), 3.39 (t,  $J$  = 9.1 Hz, 2H), 3.26 (t,  $J$  = 9.2 Hz, 2H);  $^{13}\text{C}\{^1\text{H}\}$  NMR (100 MHz,  $\text{CDCl}_3$ , 24 °C):  $\delta$



198.9, 141.1, 138.6, 136.8, 136.7, 133.2, 129.1, 129.0, 128.7, 128.2, 126.8, 125.9, 122.4, 121.2, 121.2, 119.0, 117.9, 110.5, 102.7, 38.3, 22.2; HRMS: (ESI)  $m/z$  calcd. for  $C_{26}H_{20}N_2OS$ , 409.1369  $[M+H]^+$ ; found 409.1384.

### 3-(3-Methyl-1-(pyridin-2-yl)-1H-indol-2-yl)-1-phenylpropan-1-one (3l):

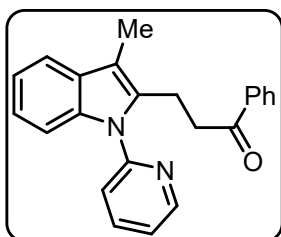

Yield: 61% (Yield was calculated based on  $^1H$  NMR); yellow liquid;  $R_f = 0.5$  in 1:9 EtOAc/Hexane; IR ( $\nu_{max}$ ,  $cm^{-1}$ ): 3056, 2993, 1680, 1518, 1262, 755;  $^1H$  NMR (400 MHz,  $CDCl_3$ , 24  $^{\circ}C$ ):  $\delta$  8.62 (s, 1H), 7.87 (d,  $J = 7.1$  Hz, 1H), 7.56-7.47 (m, 3H), 7.44-7.38 (m, 2H), 7.37-7.33 (m, 2H), 7.15 (t,  $J = 7.2, 1.0$  Hz, 2H), 3.26 (s, 4H), 2.33 (s, 3H);  $^{13}C\{^1H\}$  NMR (100 MHz,  $CDCl_3$ , 24  $^{\circ}C$ ):  $\delta$  199.5, 138.4, 136.8, 136.6, 135.8, 133.1, 129.6, 128.7, 128.6, 128.4, 128.3, 128.1, 122.1, 120.5, 118.5, 110.5, 109.9, 38.9, 20.2, 8.8; HRMS: (ESI)  $m/z$  calcd. for  $C_{23}H_{20}N_2O$ , 341.1648  $[M+H]^+$ ; found 341.1654.

### 3-(3-Chloro-5-methoxy-1-(pyridin-2-yl)-1H-indol-2-yl)-1-phenylpropan-1-one (3m):

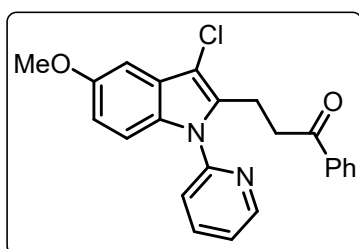

Yield: 61%; yellow liquid;  $R_f = 0.5$  in 1:9 EtOAc/Hexane; IR ( $\nu_{max}$ ,  $cm^{-1}$ ): 3020, 2860, 1680, 1567, 1234, 751;  $^1H$  NMR (400 MHz,  $CDCl_3$ , 24  $^{\circ}C$ ):  $\delta$  8.48 (d,  $J = 3.1$  Hz, 1H), 7.89-7.76 (m, 3H), 7.45 (t,  $J = 8.1$  Hz, 1H), 7.39-7.31 (m, 3H), 7.21 (dd,  $J = 7.1, 4.8$  Hz, 1H), 7.16 (d,  $J = 8.5$  Hz, 1H), 6.96 (d,  $J = 2.3$  Hz, 1H), 6.75 (dd,  $J = 8.6, 2.4$  Hz, 1H), 3.80 (s, 3H), 3.34-3.27 (m, 2H), 3.17 (m, 2H);  $^{13}C\{^1H\}$  NMR (100 MHz,  $CDCl_3$ , 24  $^{\circ}C$ ):  $\delta$  198.9, 155.5, 150.8, 149.8, 138.6, 136.6, 135.8, 133.2, 130.3, 128.2, 126.7, 122.5, 120.7, 113.3, 111.6, 106.6, 99.4, 55.9, 37.9, 20.2; HRMS: (ESI)  $m/z$  calcd. for  $C_{23}H_{19}ClN_2O_2$ , 391.1208  $[M+H]^+$ ; found 391.1300.

### 3-(3-Chloro-5-methoxy-1-(pyridin-2-yl)-1H-indol-2-yl)-1-phenylpropan-1-one (3n):

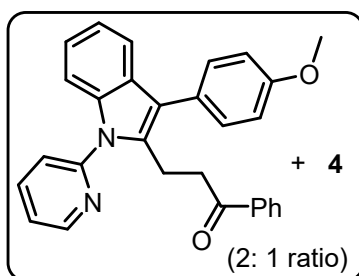

Yield: 48% (Yield was calculated based on  $^1H$  NMR); (2: 1 ratio of **3m** and **4**); yellow liquid;  $R_f = 0.5$  in 1:9 EtOAc/Hexane; IR ( $\nu_{max}$ ,  $cm^{-1}$ ): 3006, 2856, 1670, 1567, 1234, 755;  $^1H$  NMR (400 MHz,  $CDCl_3$ , 24  $^{\circ}C$ ):  $\delta$  8.47 (d,  $J = 3.8$  Hz, 1H), 7.87-7.83 (m, 3H), 7.80 (d,  $J = 7.6$  Hz, 1H),

7.72–7.69 (m, 3H), 7.46–7.741 (m, 2H), 7.37–7.32 (m, 2H), 7.32 (dt,  $J = 8.5, 1.0$  Hz, 2H), 7.05 (dt,  $J = 7.2, 0.6$  Hz, 2H), 3.75 (s, 3H), 3.75 (s, 3H), 3.27 (s, 4H); 2.93–2.90 (m, 2H), 1.74–1.72 (m, 2H);  $^{13}\text{C}\{^1\text{H}\}$  NMR (100 MHz,  $\text{CDCl}_3$ , 24 °C):  $\delta$  200.7, 198.3, 158.6, 152.3, 149.0, 138.4, 137.0, 135.7, 133.2, 133.0, 128.9, 128.7, 128.3, 128.1, 127.2, 127.1, 126.8, 123.5, 122.8, 121.6, 120.5, 120.1, 120.0, 114.6, 114.3, 113.3, 58.3, 38.7, 38.4, 27.7, 23.9; HRMS: (ESI)  $m/z$  calcd. for  $\text{C}_{29}\text{H}_{24}\text{N}_2\text{O}_2$ , 433.1911  $[\text{M}+\text{H}]^+$ ; found 433.1923.

### 1-Phenyl-3-(1-(pyridin-2-yl)-3-(4-(trifluoromethoxy)phenyl)-1H-indol-2-yl)propan-1-one

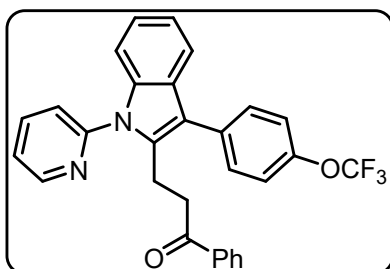

#### (3o):

Yield: 45%; yellow liquid;  $R_f = 0.5$  in 1:9 EtOAc/Hexane; IR ( $\nu_{\text{max}}$ ,  $\text{cm}^{-1}$ ): 3008, 2987, 1678, 1446, 1245, 987, 750;  $^1\text{H}$  NMR (400 MHz,  $\text{CDCl}_3$ , 24 °C):  $\delta$  8.64 (d,  $J = 4.6$  Hz, 1H), 7.99–7.88 (m, 4H), 7.55–7.53 (m, 3H), 7.52–7.29 (m, 4H), 7.16–7.15 (m, 2H), 7.13 (d,  $J = 6.5$  Hz, 2H), 6.49 (s, 1H), 3.42–3.37 (m, 2H), 3.29–3.24 (m, 2H);  $^{13}\text{C}\{^1\text{H}\}$  NMR (100 MHz,  $\text{CDCl}_3$ , 24 °C):  $\delta$  199.1, 151.5, 149.8, 140.4, 138.6, 137.4, 136.8, 133.2, 128.7, 128.3, 128.2, 124.9, 122.3, 122.0, 121.3, 120.9, 120.2, 110.3, 102.5, 38.3, 20.3; HRMS: (ESI)  $m/z$  calcd. for  $\text{C}_{29}\text{H}_{21}\text{F}_3\text{N}_2\text{O}_2$ , 487.1628  $[\text{M}+\text{H}]^+$ ; found 487.1623.

### 3-(1-(4-Methylpyridin-2-yl)-1H-indol-2-yl)-1-phenylpropan-1-one (3p):

Yield: 64 %; yellow liquid;  $R_f = 0.50$  in 1:9 EtOAc/Hexane; IR ( $\nu_{\text{max}}$ ,  $\text{cm}^{-1}$ ): 3007, 1684, 1456, 1273, 754;  $^1\text{H}$  NMR (500 MHz,  $\text{CDCl}_3$ , 24 °C):  $\delta$  8.49 (d,  $J = 4.9$  Hz, 1H), 7.94 (d,  $J = 7.6$  Hz, 2H), 7.60–7.54 (m, 2H), 7.45 (t,  $J = 7.9$  Hz, 2H), 7.33–7.28 (m, 2H), 7.17–7.11 (m, 3H), 6.48 (s, 1H), 3.40 (t,  $J = 9.5$  Hz, 2H), 3.25 (t,  $J = 9.4$  Hz, 2H), 2.46 (s, 3H);  $^{13}\text{C}\{^1\text{H}\}$  NMR (100 MHz,  $\text{CDCl}_3$ , 24 °C):  $\delta$  199.1, 151.4, 150.1, 149.4, 140.4, 137.5, 136.8, 133.2, 128.7, 128.6, 128.2, 123.5, 122.0, 121.8, 120.7, 120.1, 102.2, 38.3, 22.2, 21.2; HRMS: (ESI)  $m/z$  calcd. for  $\text{C}_{23}\text{H}_{20}\text{N}_2\text{O}$ , 341.11648  $[\text{M}+\text{H}]^+$ ; found 341.1661.

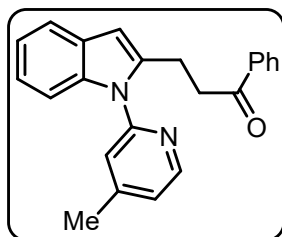

### 1-Phenyl-3-(1-(pyrimidin-2-yl)-1H-indol-2-yl)propan-1-one (3q):

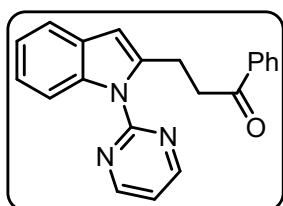

Yield: 74%; yellow liquid;  $R_f = 0.50$  in 1:9 EtOAc/Hexane; IR ( $\nu_{\text{max}}$ ,  $\text{cm}^{-1}$ ): 3008, 2912, 1678, 1589, 1448, 1234, 690;  $^1\text{H}$  NMR (400 MHz,  $\text{CDCl}_3$ , 24 °C):  $\delta$  8.77 (d,  $J = 4.8$  Hz, 2H), 8.32 (d,  $J = 8.3$  Hz, 1H),

7.99 (d,  $J = 8.4$  Hz, 2H), 7.58-7.50 (m, 2H), 7.46 (t,  $J = 8.4$  Hz, 2H), 7.25-7.18 (m, 2H), 7.13 (t,  $J = 5.0$  Hz, 1H), 6.53 (s, 1H), 3.59 (t,  $J = 8.6$  Hz, 2H), 3.46 (t,  $J = 8.0$  Hz, 2H);  $^{13}\text{C}\{^1\text{H}\}$  NMR (100 MHz,  $\text{CDCl}_3$ , 24 °C):  $\delta$  199.4, 158.3, 140.9, 137.1, 133.1, 129.4, 128.7, 128.2, 122.1, 119.9, 117.2, 114.3, 106.3, 72.9, , 38.9, 24.3; HRMS: (ESI)  $m/z$  calcd. for  $\text{C}_{21}\text{H}_{17}\text{N}_3\text{O}$ , 328.1444  $[\text{M}+\text{H}]^+$ ; found 328.1456.

### 3-(1-(Pyridin-2-yl)-1H-indol-2-yl)-1-(p-tolyl)propan-1-one (3r):

Yield: 72%; yellow liquid;  $R_f = 0.50$  in 1:9 EtOAc/Hexane; IR ( $\nu_{\text{max}}$ ,  $\text{cm}^{-1}$ ): 3008, 2912, 1680,

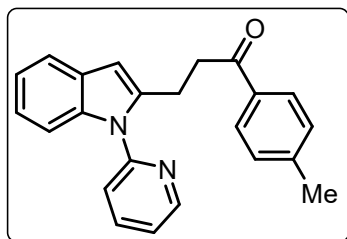

1469, 1427, 1181, 752;  $^1\text{H}$  NMR (500 MHz,  $\text{CDCl}_3$ , 24 °C):  $\delta$  8.64 (dd,  $J = 4.8, 1.3$  Hz, 1H), 7.89 (dt,  $J = 7.6, 2.0$  Hz, 1H), 7.83 (d,  $J = 8.1$  Hz, 2H), 7.57 (dd,  $J = 7.6, 3.0$  Hz, 1H), 7.48 (d,  $J = 8.1$  Hz, 1H), 7.35-7.30 (m, 2H), 7.24 (d,  $J = 8.1$  Hz, 2H), 7.15-7.11 (m, 2H), 6.48 (s, 1H), 3.36 (t,  $J = 8.1$  Hz, 2H), 3.24 (t,  $J = 7.6$  Hz, 2H),

2.40 (s, 3H);  $^{13}\text{C}\{^1\text{H}\}$  NMR (100 MHz,  $\text{CDCl}_3$ , 24 °C):  $\delta$  198.7, 151.4, 149.8, 144.0, 140.5, 138.6, 137.4, 134.4, 129.4, 128.7, 128.3, 122.3, 121.9, 121.3, 120.8, 120.1, 110.3, 102.4, 38.1, 22.3, 21.7; HRMS: (ESI)  $m/z$  calcd. for  $\text{C}_{23}\text{H}_{20}\text{N}_2\text{O}$ , 341.1648  $[\text{M}+\text{H}]^+$ ; found 341.1653.

### 3-(1-(Pyridin-2-yl)-1H-indol-2-yl)-1-(p-tolyl)propan-1-one (3s):

Yield: 53%; yellow liquid;  $R_f = 0.50$  in 1:9 EtOAc/Hexane; IR ( $\nu_{\text{max}}$ ,  $\text{cm}^{-1}$ ): 3008, 2912, 1680,

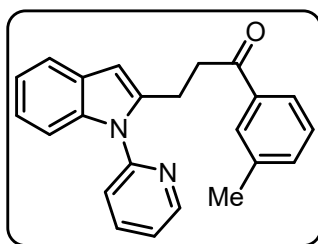

1469, 1427, 1181, 752;  $^1\text{H}$  NMR (500 MHz,  $\text{CDCl}_3$ , 24 °C):  $\delta$  8.64 (dd,  $J = 4.8, 1.3$  Hz, 1H), 7.89 (dt,  $J = 7.6, 2.0$  Hz, 1H), 7.83 (d,  $J = 8.1$  Hz, 2H), 7.57 (dd,  $J = 7.6, 3.0$  Hz, 1H), 7.48 (d,  $J = 8.1$  Hz, 1H), 7.35-7.30 (m, 2H), 7.24 (d,  $J = 8.1$  Hz, 2H), 7.15-7.11 (m, 2H), 6.48 (s, 1H), 3.36 (t,  $J = 8.1$  Hz, 2H), 3.24 (t,  $J = 7.6$  Hz, 2H), 2.40 (s,

3H);  $^{13}\text{C}\{^1\text{H}\}$  NMR (100 MHz,  $\text{CDCl}_3$ , 24 °C):  $\delta$  198.7, 151.4, 149.8, 144.0, 140.5, 138.6, 137.4, 134.4, 129.4, 128.7, 128.3, 122.3, 121.9, 121.3, 120.8, 120.1, 110.3, 102.4, 38.1, 22.3, 21.7; HRMS: (ESI)  $m/z$  calcd. for  $\text{C}_{23}\text{H}_{20}\text{N}_2\text{O}$ , 341.1648  $[\text{M}+\text{H}]^+$ ; found 341.1653.

### 3-(1-(Pyridin-2-yl)-1H-indol-2-yl)-1-(o-tolyl)propan-1-one (3t):

Yield: 48%; yellow liquid;  $R_f = 0.50$  in 1:9 EtOAc/Hexane; IR ( $\nu_{\text{max}}$ ,  $\text{cm}^{-1}$ ): 3008, 2993, 1668,

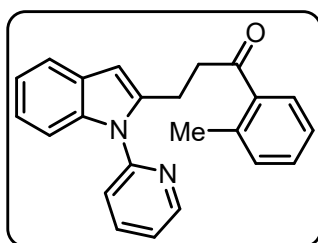

1445, 1260, 751;  $^1\text{H}$  NMR (400 MHz,  $\text{CDCl}_3$ , 24 °C):  $\delta$  8.63 (dd,  $J = 8.6, 2.0$  Hz, 1H), 7.89 (dt,  $J = 7.8, 1.9$  Hz, 1H), 7.75-7.71 (m, 2H),

7.56 (dd,  $J = 7.6, 2.6$  Hz, 1H), 7.48 (d,  $J = 7.9$  Hz, 1H), 7.37-7.30 (m, 4H), 7.15-7.11 (m, 2H), 6.49 (s, 1H), 3.39-3.35 (m, 2H), 3.27-3.23 (m, 2H), 2.38 (s, 3H);  $^{13}\text{C}\{^1\text{H}\}$  NMR (100 MHz,  $\text{CDCl}_3$ , 24 °C):  $\delta$  199.3, 151.4, 149.8, 140.4, 138.6, 138.6, 138.5, 137.4, 136.8, 133.9, 128.7, 128.7, 128.6, 125.4, 122.3, 121.9, 121.3, 120.8, 120.1, 102.4, 38.3, 22.6, 21.5; HRMS: (ESI)  $m/z$  calcd. for  $\text{C}_{23}\text{H}_{20}\text{N}_2\text{O}$ , 341.1648  $[\text{M}+\text{H}]^+$ ; found 341.1651.

### 1-(4-(*tert*-Butyl)phenyl)-3-(1-(pyridin-2-yl)-1*H*-indol-2-yl)propan-1-one (3u):

Yield: 87%; yellow liquid;  $R_f = 0.50$  in 1:9 EtOAc/Hexane; IR ( $\nu_{\text{max}}$ ,  $\text{cm}^{-1}$ ): 3020, 2880, 1676,

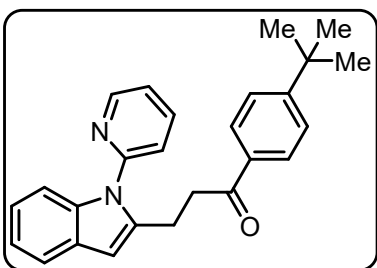

1554, 1245, 990, 750;  $^1\text{H}$  NMR (400 MHz,  $\text{CDCl}_3$ , 24 °C):  $\delta$  8.50 (d,  $J = 4.4$  Hz, 1H), 7.76 (d,  $J = 8.5$  Hz, 2H), 7.72 (d,  $J = 7.5$  Hz, 1H), 7.44 (dd,  $J = 5.9, 2.7$  Hz, 1H), 7.37-7.30 (m, 3H), 7.22 (t,  $J = 4.8$  Hz, 1H), 7.15 (t,  $J = 7.6$  Hz, 1H), 7.01 (dd,  $J = 5.7, 2.5$  Hz, 2H), 6.37 (s, 1H), 3.24 (t,  $J = 9.5$  Hz, 2H), 3.14 (t,  $J = 9.3$  Hz, 2H), 1.21 (s, 9H);  $^{13}\text{C}\{^1\text{H}\}$  NMR (100 MHz,  $\text{CDCl}_3$ ,

24 °C):  $\delta$  198.5, 156.8, 151.3, 149.7, 140.4, 138.4, 137.3, 134.2, 128.6, 128.0, 122.2, 121.8, 121.2, 120.7, 120.1, 110.2, 102.3, 38.0, 35.1, 31.1, 22.2; HRMS: (ESI)  $m/z$  calcd. for  $\text{C}_{26}\text{H}_{26}\text{N}_2\text{O}$ , 405.1937  $[\text{M}+\text{Na}]^+$ ; found 405.1929.

### 1-([1,1'-Biphenyl]-4-yl)-3-(1-(pyridin-2-yl)-1*H*-indol-2-yl)propan-1-one (3v) and 1-phenylpropan-1-ol:

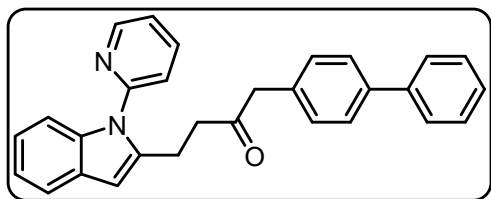

Yield: 67% (Yield was calculated based on  $^1\text{H}$  NMR); yellow liquid;  $R_f = 0.50$  in 1:9 EtOAc/Hexane; IR ( $\nu_{\text{max}}$ ,  $\text{cm}^{-1}$ ): 3006, 2990, 1670, 1545, 1424, 991, 760;  $^1\text{H}$  NMR (400 MHz,  $\text{CDCl}_3$ , 24 °C):  $\delta$  8.63 (d,  $J = 4.8$  Hz,

1H), 7.99 (d,  $J = 8.8$  Hz, 2H), 7.88 (t,  $J = 7.9$  Hz, 1H), 7.68-7.54 (m, 12H), 7.50-7.38 (m, 12H), 7.36-7.31 (m, 3H) 7.16-7.11 (m, 2H) 6.50 (s, 1H), 4.46 (t,  $J = 7.1$  Hz, 1H), 3.43-3.37 (m, 2H), 3.30-3.25 (m, 2H), 1.88-1.77 (m, 1H), 0.94 (t,  $J = 7.3$  Hz, 3H);  $^{13}\text{C}\{^1\text{H}\}$  NMR (100 MHz,  $\text{CDCl}_3$ , 24 °C):  $\delta$  198.6, 151.4, 149.8, 145.8, 143.7, 140.9, 140.5, 140.4, 139.9, 138.6, 137.8, 135.5, 129.1, 128.8, 128.7, 128.3, 127.3, 127.2, 127.1, 126.5, 122.0, 121.3, 120.8, 120.1, 110.2, 102.4, 75.8, 38.3, 31.9, 22.2, 10.3; HRMS: (ESI)  $m/z$  calcd. for  $\text{C}_{29}\text{H}_{24}\text{N}_2\text{O}$ , 403.1805  $[\text{M}+\text{H}]^+$ ; found 403.1796.

### 3-(5-Methoxy-1-(pyridin-2-yl)-1H-indol-2-yl)-1-(4-methoxyphenyl)propan-1-one (3w):

Yield: 81% (Yield was calculated based on  $^1\text{H}$  NMR); (2: 1) ratio of **3w** and **4b**; yellow liquid;

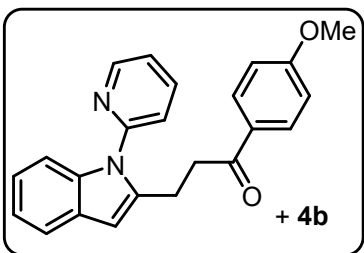

$R_f = 0.50$  in 1:9 EtOAc/Hexane; IR ( $\nu_{\text{max}}$ ,  $\text{cm}^{-1}$ ): 3009, 2990, 1670, 1559, 1270, 984, 751;  $^1\text{H}$  NMR (400 MHz,  $\text{CDCl}_3$ , 24  $^\circ\text{C}$ ):  $\delta$  8.55 (d,  $J = 3.8$  Hz, 1H), 7.88-7.72 (m, 5H), 7.47 (dd,  $J = 5.7$ , 2.7 Hz, 1H), 7.39 (d,  $J = 8.0$  Hz, 1H), 7.26-7.20 (m, 2H), 6.82 (dd,  $J = 8.1$ , 6.1 Hz, 4H) 6.39 (s, 1H) 3.76 (s, 3H) 3.26 (s, 2H),

3.27-3.21 (m, 2H), 3.19-3.12 (m, 2H), 2.91-2.85 (m, 1.6H), 1.76-1.70 (m, 2H);  $^{13}\text{C}\{^1\text{H}\}$  NMR (100 MHz,  $\text{CDCl}_3$ , 24  $^\circ\text{C}$ ):  $\delta$  198.8, 197.6, 163.6, 151.4, 149.7, 140.5, 138.6, 137.4, 130.4, 128.6, 122.3, 121.9, 121.3, 120.8, 120.1, 113.8, 113.7, 110.2, 102.4, 55.5, 38.8, 37.8, 24.3, 22.3; HRMS: (ESI)  $m/z$  calcd for  $\text{C}_{23}\text{H}_{19}\text{N}_2\text{O}_2$ , 379.1417  $[\text{M}+\text{Na}]^+$ ; found 379.1409.

### 3-(5-Methoxy-1-(pyridin-2-yl)-1H-indol-2-yl)-1-(4-methoxyphenyl)propan-1-one (3x):

Yield: 68% (Yield was calculated based on  $^1\text{H}$  NMR); (20: 1) ratio of **3ax** and **4x**; yellow liquid;

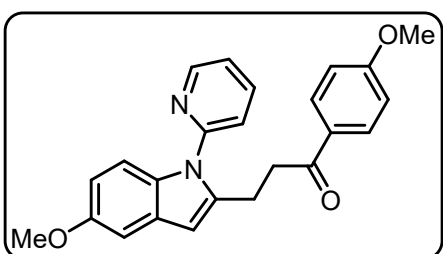

$R_f = 0.50$  in 2:8 EtOAc/Hexane; IR ( $\nu_{\text{max}}$ ,  $\text{cm}^{-1}$ ): 3007, 2964, 1675, 1445, 1234, 751;  $^1\text{H}$  NMR (400 MHz,  $\text{CDCl}_3$ , 24  $^\circ\text{C}$ ):  $\delta$  8.66 (s, 1H), 7.94-7.90 (m, 4H), 7.67 (s, 1H), 7.54 (dd,  $J = 7.5$ , 8.1 Hz, 1H), 7.45 (d,  $J = 7.5$  Hz, 1H), 7.35 (d,  $J = 7.3$  Hz, 1H), 7.19 (s, 1H), 6.95-6.89 (m, 2H),

6.41 (s, 1H), 3.86 (s, 6H), 3.32 (t,  $J = 8.1$  Hz, 2H), 3.22 (t,  $J = 8.2$  Hz, 2H);  $^{13}\text{C}\{^1\text{H}\}$  NMR (100 MHz,  $\text{CDCl}_3$ , 24  $^\circ\text{C}$ ):  $\delta$  197.2, 163.6, 141.7, 138.7, 136.0, 130.6, 130.3, 129.7, 124.6, 122.6, 122.5, 113.9, 113.8, 113.8, 113.7, 111.6, 55.6, 55.5, 37.4, 22.2; HRMS: (ESI)  $m/z$  calcd. for  $\text{C}_{24}\text{H}_{22}\text{N}_2\text{O}_3$ , 387.1703  $[\text{M}+\text{H}]^+$ ; found 387.1714.

### 1-(4-Methoxyphenyl)-3-(1-(pyridin-2-yl)-1H-indol-2-yl)propan-1-one (3y):

Yield: 60%; yellow liquid;  $R_f = 0.50$  in 1:9 EtOAc/Hexane; IR ( $\nu_{\text{max}}$ ,  $\text{cm}^{-1}$ ): 3012, 2903, 1683,

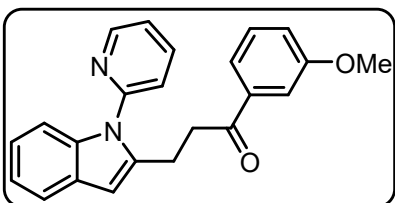

1279, 751;  $^1\text{H}$  NMR (500 MHz,  $\text{CDCl}_3$ , 24  $^\circ\text{C}$ ):  $\delta$  8.55 (d,  $J = 4.0$  Hz, 1H), 7.78 (t,  $J = 7.8$  Hz, 1H), 7.47 (dd,  $J = 6.5$ , 2.5 Hz, 3H), 7.42-7.36 (m, 3H), 7.26-7.19 (m, 3H), 7.05-6.97 (m, 3H), 6.39 (s, 1H), 3.72 (s, 3H), 3.27 (t,  $J = 8.7$  Hz, 2H), 3.16 (t,  $J =$

8.7 Hz, 2H);  $^{13}\text{C}\{^1\text{H}\}$  NMR (100 MHz,  $\text{CDCl}_3$ , 24 °C):  $\delta$  198.8, 159.9, 151.3, 149.7, 140.3, 138.6, 138.5, 138.2, 137.3, 129.6, 128.6, 122.3, 121.9, 121.3, 120.8, 120.7, 120.1, 119.6, 114.4, 112.4, 110.2, 102.4, 55.5, 38.3, 22.3; HRMS: (ESI)  $m/z$  calcd. for  $\text{C}_{23}\text{H}_{20}\text{N}_2\text{O}_2$ , 357.1598  $[\text{M}+\text{H}]^+$ ; found 357.1603.

### 1-(4-Fluorophenyl)-3-(5-methoxy-1-(pyridin-2-yl)-1H-indol-2-yl)propan-1-one (3z):

Yield: 68%; yellow liquid;  $R_f$  = 0.50 in 1:9 EtOAc/Hexane; IR ( $\nu_{\text{max}}$ ,  $\text{cm}^{-1}$ ): 3008, 2998, 1678,

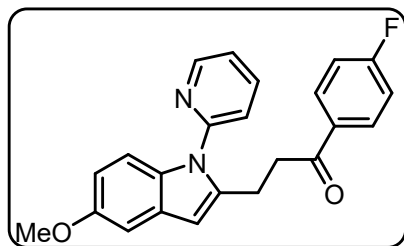

1588, 1465, 1224, 750;  $^1\text{H}$  NMR (400 MHz,  $\text{CDCl}_3$ , 24 °C):  $\delta$  8.52 (d,  $J$  = 4.6 Hz, 1H), 7.86 (dd,  $J$  = 7.4, 3.0 Hz, 2H), 7.97 (dt,  $J$  = 8.6, 1.8 Hz, 1H), 7.36 (d,  $J$  = 7.9 Hz, 1H), 7.20 (dd,  $J$  = 6.8, 2.3 Hz, 1H), 7.16 (d,  $J$  = 9.1 Hz, 1H), 7.01 (t,  $J$  = 8.9 Hz, 2H), 6.94 (d,  $J$  = 2.1 Hz, 1H), 6.70 (dd,  $J$  = 8.7, 2.5 Hz,

1H), 6.31 (s, 1H), 3.75 (s, 3H), 3.26 (t,  $J$  = 9.3 Hz, 2H), 3.15 (t,  $J$  = 8.6 Hz, 2H);  $^{13}\text{C}\{^1\text{H}\}$  NMR (100 MHz,  $\text{CDCl}_3$ , 24 °C):  $\delta$  197.5, 167.1, 164.6, 154.9, 151.5, 149.7, 140.8, 138.5, 133.3, 133.2, 132.4, 130.8, 130.7, 129.2, 122.1, 120.9, 115.8, 115.7, 111.6, 111.1, 110.5, 102.3, 55.9, 38.3, 22.3; HRMS: (ESI)  $m/z$  calcd. for  $\text{C}_{23}\text{H}_{19}\text{FN}_2\text{O}_2$ , 375.1503  $[\text{M}+\text{H}]^+$ ; found 375.1535.

### 1-(4-Chlorophenyl)-3-(1-(pyridin-2-yl)-1H-indol-2-yl)propan-1-one (3aa):

Yield: 66%; yellow liquid;  $R_f$  = 0.50 in 1:9 EtOAc/Hexane; IR ( $\nu_{\text{max}}$ ,  $\text{cm}^{-1}$ ): 3008, 2860, 1687,

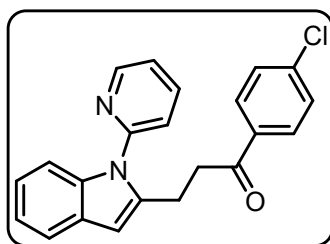

1468, 1234, 990, 751;  $^1\text{H}$  NMR (400 MHz,  $\text{CDCl}_3$ , 24 °C):  $\delta$  8.55 (dd,  $J$  = 4.8, 2.0 Hz, 1H), 7.85-7.77 (m, 3H), 7.49 (dd,  $J$  = 5.7, 3.1 Hz, 1H), 7.41 (dt,  $J$  = 7.8, 1.1 Hz, 1H), 7.34 (d,  $J$  = 7.3 Hz, 2H), 7.27-7.24 (m, 2H) 7.07-7.05 (m, 2H), 6.40 (s, 1H) 3.31-3.27 (m, 2H), 3.19-3.15 (m, 2H);  $^{13}\text{C}\{^1\text{H}\}$  NMR (100 MHz,  $\text{CDCl}_3$ , 24 °C):

$\delta$  197.8, 151.4, 149.8, 140.1, 139.7, 138.6, 137.3, 135.1, 129.6, 129.0, 128.6, 127.5, 122.3, 121.2, 120.9, 120.2, 110.3, 102.6, 38.3, 22.2; HRMS: (ESI)  $m/z$  calcd. for  $\text{C}_{22}\text{H}_{17}\text{ClN}_2\text{O}$ , 361.1102  $[\text{M}+\text{H}]^+$ ; found 361.1094.

### 1-(3-Chlorophenyl)-3-(5-methyl-1-(pyridin-2-yl)-1H-indol-2-yl)propan-1-one (3ab):

Yield: 71%; yellow liquid;  $R_f$  = 0.50 in 1:9 EtOAc/Hexane; IR ( $\nu_{\text{max}}$ ,  $\text{cm}^{-1}$ ): 3079, 2918, 1689,

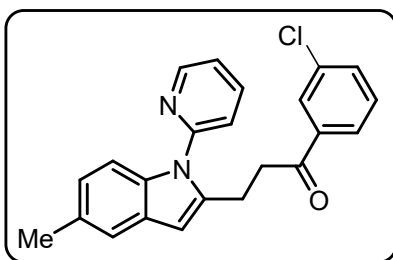

1584, 1469, 1202, 785;  $^1\text{H}$  NMR (400 MHz,  $\text{CDCl}_3$ , 24 °C):  $\delta$  8.61 (d,  $J$  = 3.7 Hz, 1H), 7.92-7.86 (m, 2H), 7.80 (d,  $J$  = 7.7

Hz, 1H), 7.49-7.45 (m, 2H), 7.40-7.33 (m, 2H), 7.30 (t,  $J = 7.4$  Hz, 1H), 7.23-7.20 (m, 2H), 6.96 (d,  $J = 8.4$  Hz, 1H), 6.40 (s, 1H), 3.36 (t,  $J = 9.0$  Hz, 2H), 3.24 (t,  $J = 8.7$  Hz, 2H), 2.43 (s, 3H);  $^{13}\text{C}\{^1\text{H}\}$  NMR (100 MHz,  $\text{CDCl}_3$ , 24 °C):  $\delta$  197.9, 151.5, 149.7, 140.1, 138.5, 138.4, 135.6, 135.0, 133.1, 130.2, 128.9, 128.9, 128.3, 126.2, 123.5, 122.1, 120.9, 119.9, 109.9, 102.3, 38.5, 22.2, 21.5; HRMS: (ESI)  $m/z$  calcd for  $\text{C}_{23}\text{H}_{19}\text{ClN}_2\text{O}$ , 397.1070  $[\text{M}+\text{Na}]^+$ ; found 397.1073.

### 3-(5-Bromo-1-(pyridin-2-yl)-1H-indol-2-yl)-1-(3-chlorophenyl)propan-1-one (3ac):

Yield: 67%; yellow liquid;  $R_f = 0.50$  in 1:9 EtOAc/Hexane; IR ( $\nu_{\text{max}}$ ,  $\text{cm}^{-1}$ ): 3072, 2934, 1689,

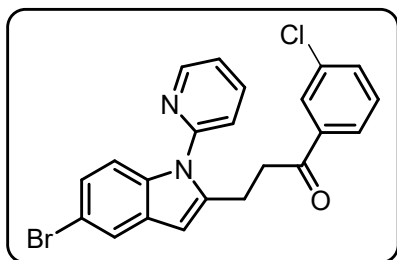

1575, 1472, 1337, 1200, 787;  $^1\text{H}$  NMR (400 MHz,  $\text{CDCl}_3$ , 24 °C):  $\delta$  8.65 (d,  $J = 4.2$  Hz, 1H), 7.95-7.88 (m, 2H), 7.80 (d,  $J = 7.7$  Hz, 1H), 7.67-7.45 (s, 1H), 7.52 (t,  $J = 8.0$  Hz, 1H), 7.45 (d,  $J = 8.0$  Hz, 1H), 7.42-7.34 (m, 2H), 7.23-7.15 (m, 2H), 6.41 (s, 1H), 3.36 (t,  $J = 9.1$  Hz, 2H), 3.22 (t,  $J = 8.7$  Hz, 2H);

$^{13}\text{C}\{^1\text{H}\}$  NMR (100 MHz,  $\text{CDCl}_3$ , 24 °C):  $\delta$  197.9, 150.9, 149.9, 141.3, 138.8, 138.3, 136.0, 135.1, 133.2, 130.3, 128.2, 126.2, 124.8, 122.7, 122.6, 121.2, 114.0, 111.7, 101.9, 38.2, 22.1; HRMS: (ESI)  $m/z$  calcd. for  $\text{C}_{22}\text{H}_{16}\text{BrClN}_2\text{O}$ , 439.0207  $[\text{M}+\text{H}]^+$ ; found 441.0316.

### 1-Phenyl-4-(1-(pyridin-2-yl)-1H-indol-2-yl)butan-2-one (3ad):

Yield: 79% (Yield was calculated based on  $^1\text{H}$  NMR); (1: 1) ratio of **3ad** and **4d**; yellow liquid;

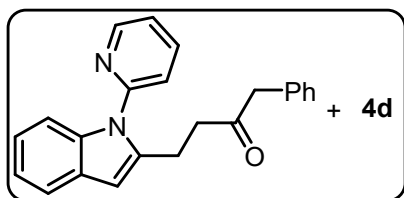

$R_f = 0.50$  in 1:9 EtOAc/Hexane; IR ( $\nu_{\text{max}}$ ,  $\text{cm}^{-1}$ ): 3059, 2933, 1710, 1585, 1461, 1211, 1090, 701;  $^1\text{H}$  NMR (400 MHz,  $\text{CDCl}_3$ , 24 °C):  $\delta$  8.65 (d,  $J = 4.4$  Hz, 1H), 7.83 (t,  $J = 7.8$  Hz, 1H), 7.52 (t,  $J = 4.7$  Hz, 1H), 7.37 (t,  $J = 7.9$  Hz, 1H), 7.33-

7.21 (m, 9H), 7.19-7.07 (m, 6H), 6.31 (s, 1H), 3.63 (s, 2H), 3.62 (s, 2H), 3.05 (t,  $J = 8.7$  Hz, 2H), 2.82 (t,  $J = 7.9$  Hz, 2H), 2.41-2.35 (m, 2H), 1.49-1.43 (m, 2H);  $^{13}\text{C}\{^1\text{H}\}$  NMR (100 MHz,  $\text{CDCl}_3$ , 24 °C):  $\delta$  208.1, 207.1, 151.2, 149.7, 139.9, 138.4, 137.2, 134.3, 134.1, 129.4, 128.8, 128.5, 127.1, 127.0, 122.2, 121.9, 121.1, 120.8, 120.8, 120.1, 110.1, 102.3, 50.2, 50.1, 41.6, 41.1, 23.0, 21.7; HRMS: (ESI)  $m/z$  calcd. for  $\text{C}_{23}\text{H}_{20}\text{N}_2\text{O}$ , 341.1648  $[\text{M}+\text{H}]^+$ ; found 341.1618.

### 1-(Naphthalen-2-yl)-4-(1-(pyridin-2-yl)-1H-indol-2-yl)butan-2-one (3ae):

Yield: 72% (Yield was calculated based on  $^1\text{H}$  NMR); (4: 1) ratio of **3ae** and **4ae**; yellow liquid;

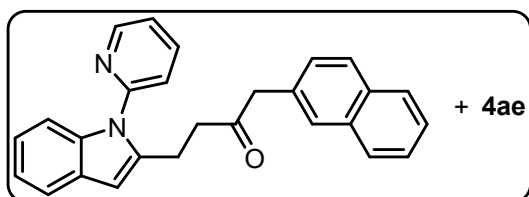

$R_f = 0.50$  in 1:9 EtOAc/Hexane; IR ( $\nu_{\text{max}}$ ,  $\text{cm}^{-1}$ ): 3056,

2912, 1679, 1554, 1443, 1224, 755;  $^1\text{H}$  NMR (400 MHz,  $\text{CDCl}_3$ , 24 °C):  $\delta$  8.36 (dd,  $J = 4.8, 1.6$  Hz, 1H), 7.71-7.60 (m, 7H), 7.50 (s, 0.7H), 7.46 (s, 1H), 7.39-7.31 (m, 5H), 7.19-7.10 (m, 5H), 7.05 (dd,  $J = 7.5, 0.7$  Hz, 1H), 7.00-6.96 (m, 2H), 6.19 (s, 1H), 3.67 (s, 2H), 3.64 (s, 1.4H), 2.96 (t,  $J = 9.3$  Hz, 2H), 2.70 (t,  $J = 9.3$  Hz, 2H), 2.31-2.28 (m, 1.3 H), 1.38-1.35 (m, 1.3H);  $^{13}\text{C}\{^1\text{H}\}$  NMR (100 MHz,  $\text{CDCl}_3$ , 24 °C):  $\delta$  208.1, 207.1, 151.2, 149.6, 139.8, 138.3, 137.2, 133.6, 132.5, 131.8, 131.6, 128.5, 128.4, 128.1, 127.8, 127.7, 127.5, 127.4, 126.3, 125.9, 125.8, 122.3, 121.9, 120.9, 120.7, 120.1, 110.1, 102.5, 50.4, 50.3, 41.6, 43.1, 23.0, 21.7; HRMS: (ESI)  $m/z$  calcd. for  $\text{C}_{27}\text{H}_{22}\text{N}_2\text{O}$ , 391.1805  $[\text{M}+\text{H}]^+$ ; found 391.1818.

#### 4-(5-Bromo-1-(pyridin-2-yl)-1H-indol-2-yl)-1-phenoxybutan-2-one (3af):

Yield: 54%; yellow liquid;  $R_f = 0.50$  in 1:9 EtOAc/Hexane; IR ( $\nu_{\text{max}}$ ,  $\text{cm}^{-1}$ ): 3072, 2934, 1689,

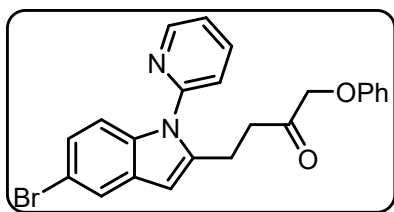

1575, 1472, 1337, 1200, 787;  $^1\text{H}$  NMR (400 MHz,  $\text{CDCl}_3$ , 24 °C):  $\delta$  8.53 (s, 1H), 7.81 (t,  $J = 8.7$  Hz, 1H), 7.59 (s, 1H), 7.33-7.23 (m, 2H), 7.22-7.16 (m, 2H), 7.15-7.05 (m, 2H), 6.91 (t,  $J = 7.9$  Hz, 1H), 6.74 (d,  $J = 8.2$  Hz, 2H), 6.28 (s, 1H), 4.44 (s, 2H), 3.05 (t,  $J = 8.5$  Hz, 2H), 2.92 (t,  $J = 8.7$  Hz, 2H);  $^{13}\text{C}\{^1\text{H}\}$

NMR (100 MHz,  $\text{CDCl}_3$ , 24 °C):  $\delta$  206.7, 157.7, 141.1, 138.7, 135.9, 130.3, 130.2, 129.8, 129.8, 129.7, 128.9, 124.8, 122.7, 121.9, 114.5, 114.0, 111.7, 101.9, 72.9, 38.3, 22.0; HRMS: (ESI)  $m/z$  calcd. for  $\text{C}_{23}\text{H}_{19}\text{BrN}_2\text{O}_2$ , 457.0522  $[\text{M}+\text{Na}]^+$ ; found 457.0522.

#### 1-(1-(Pyridin-2-yl)-1H-indol-2-yl)nonan-3-one (3ag):

Yield: 77%; yellow liquid;  $R_f = 0.50$  in 1:9 EtOAc/Hexane; IR ( $\nu_{\text{max}}$ ,  $\text{cm}^{-1}$ ): 3119, 2926, 1712,

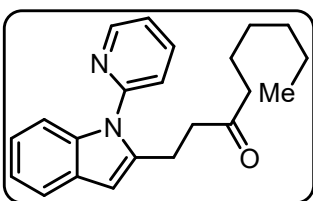

1276, 1461, 1276, 1173, 758;  $^1\text{H}$  NMR (500 MHz,  $\text{CDCl}_3$ , 24 °C):  $\delta$  8.61 (dd,  $J = 5.0, 1.7$  Hz, 1H), 7.85 (dt,  $J = 8.0, 1.9$  Hz, 1H), 7.54 (dd,  $J = 7.5, 3.0$  Hz, 1H), 7.42 (d,  $J = 8.0$  Hz, 1H), 7.32-7.26 (m, 2H), 7.13-7.09 (m, 2H), 6.31 (s, 1H), 3.01 (t,  $J = 9.4$  Hz, 2H), 2.76 (t,

$J = 9.2$  Hz, 2H), 2.35 (t,  $J = 8.3$  Hz, 2H), 1.56-1.49 (m, 2H), 1.32-1.20 (m, 8H), 0.86 (t,  $J = 7.3$  Hz, 3H);  $^{13}\text{C}\{^1\text{H}\}$  NMR (100 MHz,  $\text{CDCl}_3$ , 24 °C):  $\delta$  209.9, 167.1, 151.3, 149.7, 140.2, 138.4, 138.4, 137.3, 128.6, 122.2, 121.9, 121.1, 120.8, 120.0, 110.2, 102.3, 42.9, 41.8, 31.6, 28.9, 23.8, 22.5, 21.7, 14.1; HRMS: (ESI)  $m/z$  calcd. for  $\text{C}_{22}\text{H}_{26}\text{N}_2\text{O}$ , 335.2118  $[\text{M}+\text{H}]^+$ ; found 335.2132.



### 1-Adamantan-1-yl)-3-(1-(pyridin-2-yl)-1H-indol-2-yl)propan-1-one (3ah):

Yield: 55%; yellow liquid;  $R_f = 0.5$  in 1:9 EtOAc/Hexane; IR ( $\nu_{\max}$ ,  $\text{cm}^{-1}$ ): 3008, 2912, 1680,

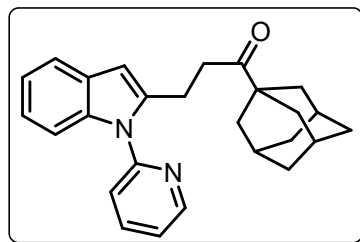

1460, 1427, 1181, 752;  $^1\text{H}$  NMR (400 MHz,  $\text{CDCl}_3$ , 24 °C):  $\delta$  8.64 (d,  $J = 4.7$  Hz, 1H), 7.89 (td,  $J = 8.4, 1.6$  Hz, 1H), 7.56 (dd,  $J = 5.6, 3.2$  Hz, 1H), 7.46 (d,  $J = 7.7$  Hz, 1H), 7.32 (m, 2H), 7.12 (dd,  $J = 5.8, 3.2$  Hz, 2H), 6.42 (s, 1H), 3.03 (t,  $J = 9.5$  Hz, 2H), 2.85 (t,  $J = 8.0$  Hz, 2H), 2.02 (m, 3H), 1.76 (m, 7H), 1.72-1.70 (m, 2H),

1.65 (m, 5H);  $^{13}\text{C}\{^1\text{H}\}$  NMR (100 MHz,  $\text{CDCl}_3$ , 24 °C):  $\delta$  214.5, 151.5, 149.8, 140.7, 138.5, 137.4, 128.7, 122.3, 121.9, 121.9, 121.3, 120.8, 120.1, 110.3, 102.2, 46.4, 38.3, 36.7, 35.8, 28.0, 21.8; HRMS: (ESI)  $m/z$  calcd. for  $\text{C}_{26}\text{H}_{29}\text{N}_2\text{O}$ , 385.2274  $[\text{M}+\text{H}]^+$ ; found 385.2280.

### 1-(4-(tert-Butyl)phenyl)-3-(1-(pyrimidin-2-yl)-1H-indol-2-yl)propan-1-one (3ai):

Yield: 72%; yellow liquid;  $R_f = 0.50$  in 1:9 EtOAc/Hexane; IR ( $\nu_{\max}$ ,  $\text{cm}^{-1}$ ): 2993, 1680, 1574,

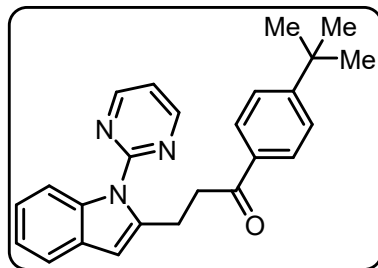

1476, 1250, 690;  $^1\text{H}$  NMR (400 MHz,  $\text{CDCl}_3$ , 24 °C):  $\delta$  8.76 (d,  $J = 7.5$  Hz, 2H), 8.30 (d,  $J = 8.2$  Hz, 1H), 7.91 (d,  $J = 8.3$  Hz, 2H), 7.52 (d,  $J = 7.6$  Hz, 2H), 7.23-7.15 (m, 2H), 7.12 (t,  $J = 4.8$  Hz, 1H), 6.52 (s, 1H), 3.58 (t,  $J = 8.1$  Hz, 2H), 3.42 (t,  $J = 7.1$  Hz, 2H), 1.33 (s, 9H);  $^{13}\text{C}\{^1\text{H}\}$  NMR (100 MHz,  $\text{CDCl}_3$ , 24 °C):  $\delta$  199.1, 158.3, 156.9, 141.1, 137.1, 134.5, 129.4, 128.2,

125.6, 122.8, 122.1, 119.8, 117.2, 114.2, 106.3, 38.8, 35.2, 31.2, 24.3; HRMS: (ESI)  $m/z$  calcd. for  $\text{C}_{25}\text{H}_{25}\text{N}_3\text{O}$ , 384.2070  $[\text{M}+\text{H}]^+$ ; found 384.2084.

### 1-(4-(phenoxy)methyl)phenyl)-3-(1-(pyrimidin-2-yl)-1H-indol-2-yl)propan-1-one (3aj):

Yield: 73%; yellow liquid;  $R_f = 0.50$  in 1:9 EtOAc/Hexane; IR ( $\nu_{\max}$ ,  $\text{cm}^{-1}$ ): 3007, 2912, 1689,

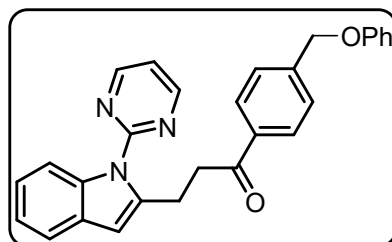

1555, 1470, 1220, 755;  $^1\text{H}$  NMR (400 MHz,  $\text{CDCl}_3$ , 24 °C):  $\delta$  8.73 (d,  $J = 5.5$  Hz, 2H), 8.30 (d,  $J = 8.2$  Hz, 1H), 7.51 (d,  $J = 6.8$  Hz, 1H), 7.22-7.11 (m, 2H), 6.98 (t,  $J = 8.1$  Hz, 1H), 6.84 (d,  $J = 6.9$  Hz, 6.46 (s, 1H), 4.56 (s, 2H), 3.48 (t,  $J = 8.4$  Hz, 2H), 3.08 (t,  $J = 8.7$  Hz, 2H);  $^{13}\text{C}\{^1\text{H}\}$  NMR (100 MHz,  $\text{CDCl}_3$ ,

24 °C):  $\delta$  207.0, 157.8, 140.3, 137.0, 129.7, 122.9, 122.1, 121.8, 119.9, 117.1, 114.6, 114.3, 106.5, 72.9, , 39.2, 23.3; HRMS: (ESI)  $m/z$  calcd. for  $\text{C}_{28}\text{H}_{23}\text{N}_3\text{O}_2$ , 434.1863  $[\text{M}+\text{H}]^+$ ; found 434.1860.

### 1-(4-(phoxymethyl)phenyl)-3-(1-(pyrimidin-2-yl)-1*H*-indol-2-yl)propan-1-one (3ak):

Yield: 12% (Yield was calculated based on <sup>1</sup>H NMR); yellow liquid; *R*<sub>f</sub> = 0.5 in 1:9

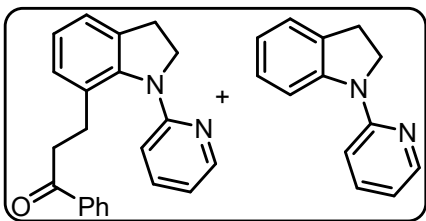

EtOAc/Hexane; IR ( $\nu_{\max}$ ,  $\text{cm}^{-1}$ ): 3067, 3008, 2980, 1676, 1554, 1260, 750; <sup>1</sup>H NMR (400 MHz, CDCl<sub>3</sub>, 24 °C):  $\delta$  8.57 (d, *J* = 4.4 Hz, 0.2H), 8.34 (d, *J* = 4.0 Hz, 1H), 8.20 (d, *J* = 8.5 Hz, 0.2H), 8.17 (d, *J* = 8.1 Hz, 1H), 8.57 (dt, *J* = 8.1, 1.9 Hz, 0.2H), 7.72 (d, *J* = 3.4, 0.2 Hz, 0.2H), 7.66 (d, *J*

= 7.4 Hz, 0.2H), 7.58 (dt, *J* = 8.7, 1.6 Hz, 1H), 7.39–7.31 (m, 3H), 7.21 (dd, *J* = 7.1, 4.8 Hz, 1H), 7.16 (d, *J* = 8.5 Hz, 1H), 6.96 (d, *J* = 2.3 Hz, 1H), 7.4 (d, *J* = 7.8 Hz, 0.2H), 7.21–7.15 (m, 2.5H), 6.86 (d, *J* = 7.5 Hz, 1H), 6.80–6.75 (m, 2H), 6.71 (d, *J* = 3.2 Hz, 0.2H), 4.04 (t, *J* = 8.9 Hz, 2.2H), 3.21 (t, *J* = 8.8 Hz, 2.2H); HRMS: (ESI) *m/z* calcd. for C<sub>23</sub>H<sub>21</sub>N<sub>2</sub>O, 328.1696 [M+H]<sup>+</sup>; found 328.1684.

## 6. Mechanistic investigation

### 6.1 Control experiment with cyclopropanol 2a:

General experimental procedure was followed for the control experiment reactions.

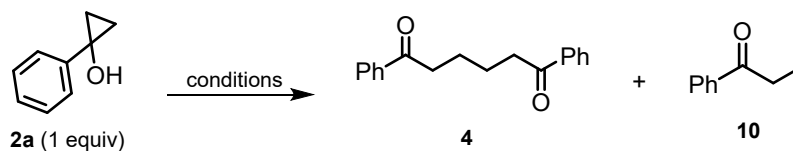

| Entry | Cp*CoI <sub>2</sub> CO<br>[10 mol%] | AgSbF <sub>6</sub><br>[20 mol%] | Cu(OAc) <sub>2</sub> ·H <sub>2</sub> O<br>[100 mol%] | Yield (%) <sup>a</sup> |    |
|-------|-------------------------------------|---------------------------------|------------------------------------------------------|------------------------|----|
|       |                                     |                                 |                                                      | 4                      | 10 |
| 1     | ✓                                   | ✓                               | ✓                                                    | 17                     | 41 |
| 2     | -                                   | ✓                               | ✓                                                    | 51                     | 4  |
| 3     | ✓                                   | -                               | ✓                                                    | 33                     | 11 |
| 4     | ✓                                   | ✓                               | -                                                    | 16                     | ND |

<sup>a</sup> All are isolated yield.

## 6.2 Intermolecular competitive experiment with *N*-pyridylindoles

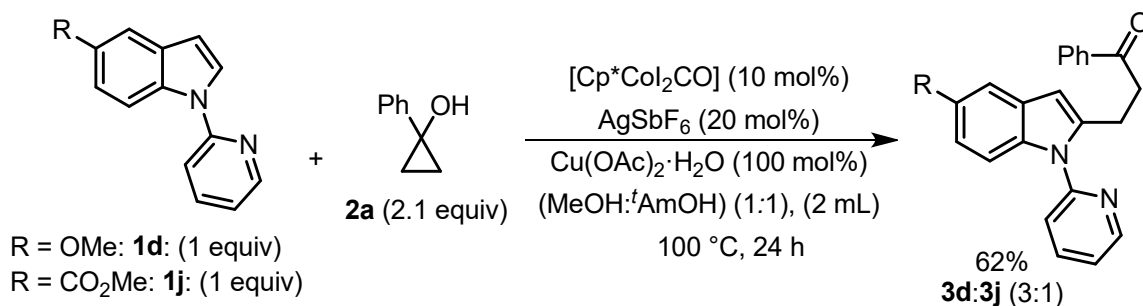

Oven-dried sealed tube was charged with 5-methoxy-1-(pyridin-2-yl)-1*H*-indole **1d** (0.22 mmol), (1.0 equiv), methyl-1-(pyridin-2-yl)-1*H*-indole-5-carboxylate **1j** (0.22 mmol), (1.0 equiv), 1-phenylcyclopropan-1-ol **2a** (0.46 mmol, 2.1 equiv), [Cp\*CoI<sub>2</sub>CO] (10 mol%), AgSbF<sub>6</sub> (20 mol%) and Cu(OAc)<sub>2</sub>·H<sub>2</sub>O (100 mol%). The inner atmosphere was made inert through repeated (thrice) evacuation and refilled with nitrogen. Dry (MeOH:*t*AmOH) (1:1), (2 mL) was added to the reaction mixture and the reaction mixture was stirred at 100 °C temperature for 4 h. After completion of the reaction (monitored by TLC), the reaction mixture was cooled to room temperature, filtered through a pad of celite, and concentrated to get the crude product. The crude product was purified by column chromatography through silica gel to afford the expected products (**3d:3j**) in 62% in 3:1 ratio.

## 6.3 Deuterium experiment

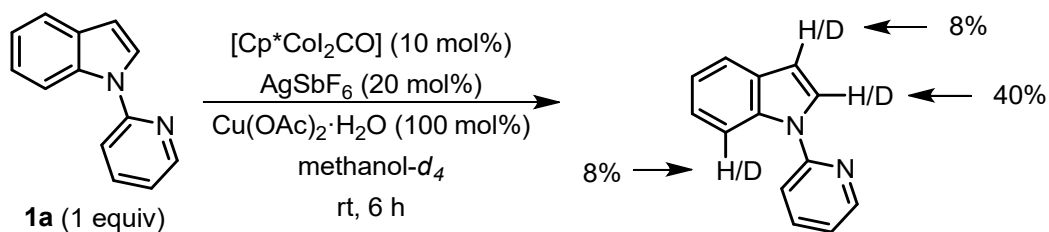

1-(pyridin-2-yl)-1*H*-indole **1a** (50 mg) (1 equiv), [Cp\*CoI<sub>2</sub>CO], (10 mol %), Cu(OAc)<sub>2</sub>·H<sub>2</sub>O (100 mol%) and AgSbF<sub>6</sub> (20 mol%) were taken in a 15 mL reaction tube, followed by methanol-*d*<sub>4</sub> (2 mL) was added. The reaction mixture was allowed to stir at room temperature for 6 h. After 6 h, the reaction was diluted with DCM, filtered through celite, and the filtrate was concentrated. The crude residue was purified by column chromatography using hexane: ethyl acetate (2:8). The recovered **1a** (93%) had deuterium incorporation at C2, C3, and C7-position in 40%, 8%, and 8%, respectively.

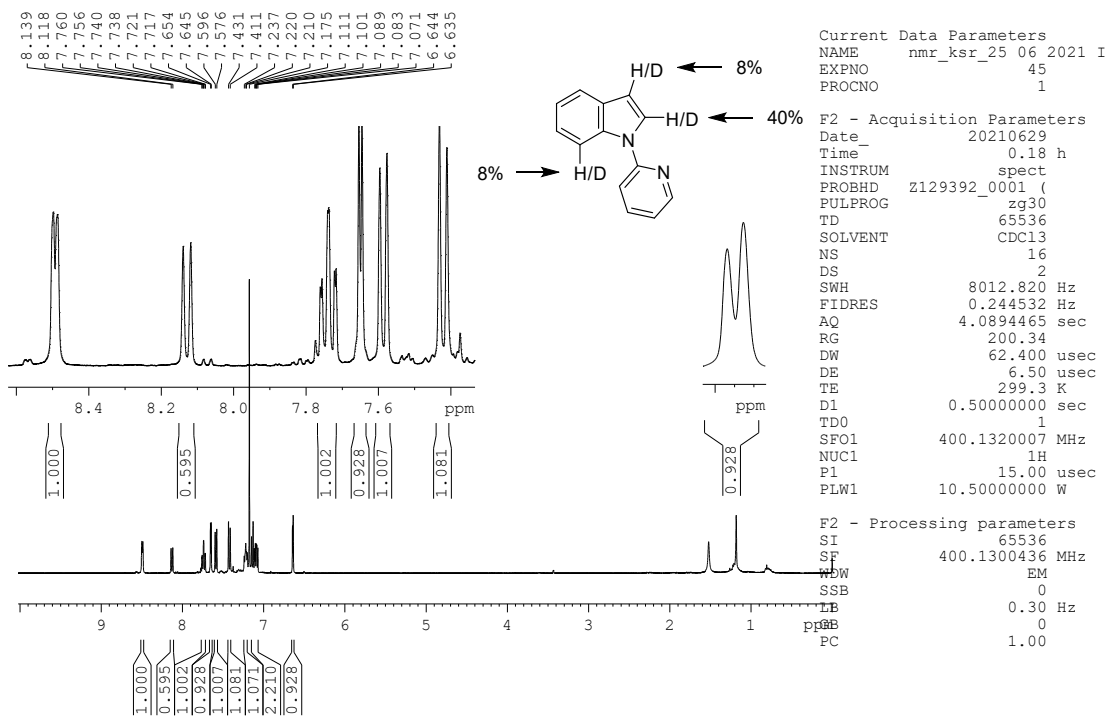

<sup>1</sup>H NMR (500 MHz, CDCl<sub>3</sub>, 24 °C) deuterated compound **1a/1a'**

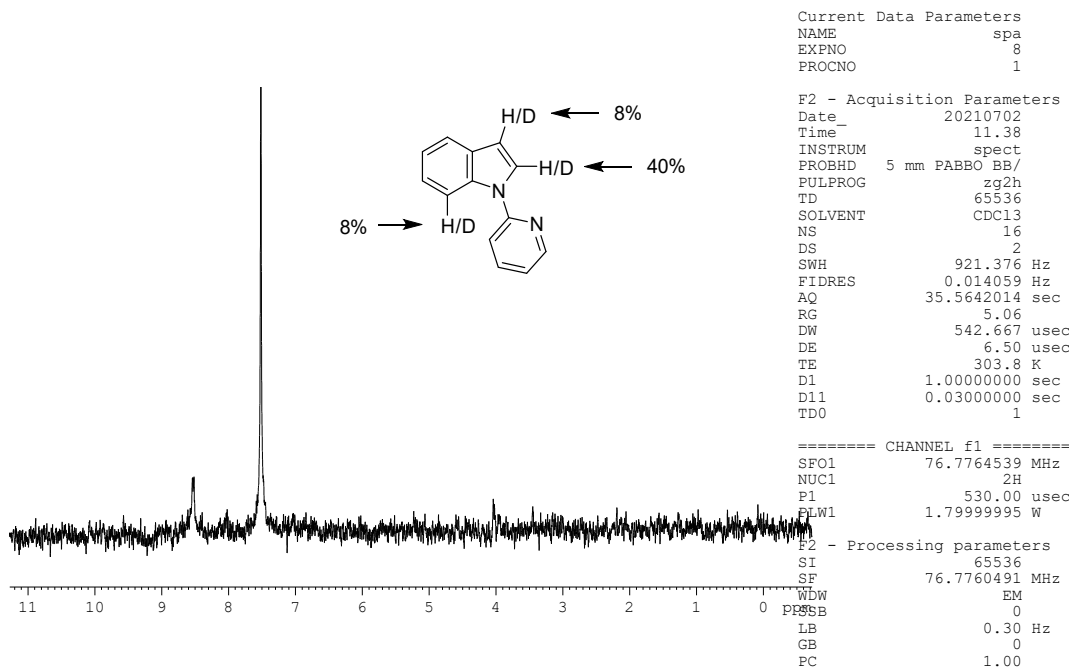

Deuterium NMR (500 MHz, CHCl<sub>3</sub>, 24 °C) of the compound **1a/1a'**

## 6.4 Stoichiometric experiments

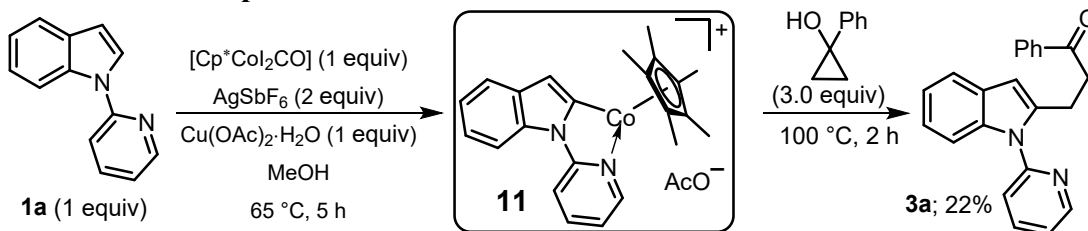

Oven-dried Schlenk tube was charged with **1a** (1 equiv, 0.26 mmol),  $\text{Cu}(\text{OAc})_2 \cdot \text{H}_2\text{O}$  (1 equiv),  $\text{AgSbF}_6$  (2 equiv) and  $[\text{Cp}^*\text{CoI}_2\text{CO}]$  (1 equiv). The charged Schlenk tube was made inert through repeated (thrice) evacuation and refilling with nitrogen. And 3 mL of dry MeOH (3mL) was added, then reaction mixture was stirred at  $65\text{ }^\circ\text{C}$  in a pre-heated oil bath for 5 h. Then, the reaction was cooled to room temperature and complex **11** was identified by HRMS. Subsequently, the compound **11** was transferred to pressure tube under inert atmosphere and **2a** (3 equiv) was added followed by stirring at  $100\text{ }^\circ\text{C}$  for 2 h. The reaction mixture was brought to room temperature, filtered through a pad of celite and concentrated to get the crude product. The crude product was purified by column chromatography through silica gel to afford the expected product **3a** in 22% yield.

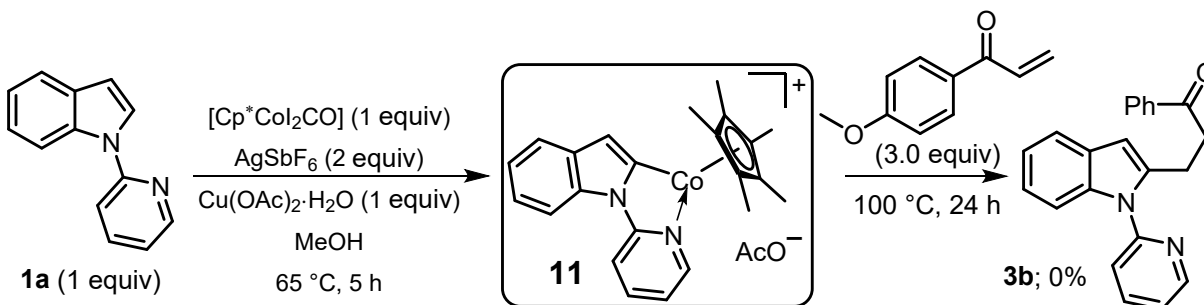

Similarly, an oven-dried Schlenk tube was charged with **1a** (1 equiv, 0.26 mmol),  $\text{Cu}(\text{OAc})_2 \cdot \text{H}_2\text{O}$  (1 equiv),  $\text{AgSbF}_6$  (2 equiv) and  $[\text{Cp}^*\text{CoI}_2\text{CO}]$  (1 equiv). The charged Schlenk tube was made inert through repeated (thrice) evacuation and refilling with nitrogen and 3 mL of dry MeOH (3mL) was added. The reaction mixture was stirred at  $65\text{ }^\circ\text{C}$  in a pre-heated oil bath for 5 h. Subsequently, compound **11** was transferred to pressure tube under inert atmosphere and 1-(4-methoxyphenyl)prop-2-en-1-one (3 equiv) was added followed by stirring at  $100\text{ }^\circ\text{C}$  for 24 h. The desired product **3b** did not formed and **1a** and 1-(4-methoxyphenyl)prop-2-en-1-one were recovered.

**7. Synthetic of 1,1-Diphenyl-4-(pyridin-2-yl)-1,2,3,4-tetrahydro cyclopenta-[b]indole (6) and 2-(3,3-diphenylallyl)-1-(pyridin-2-yl)-1H-indole (7):**

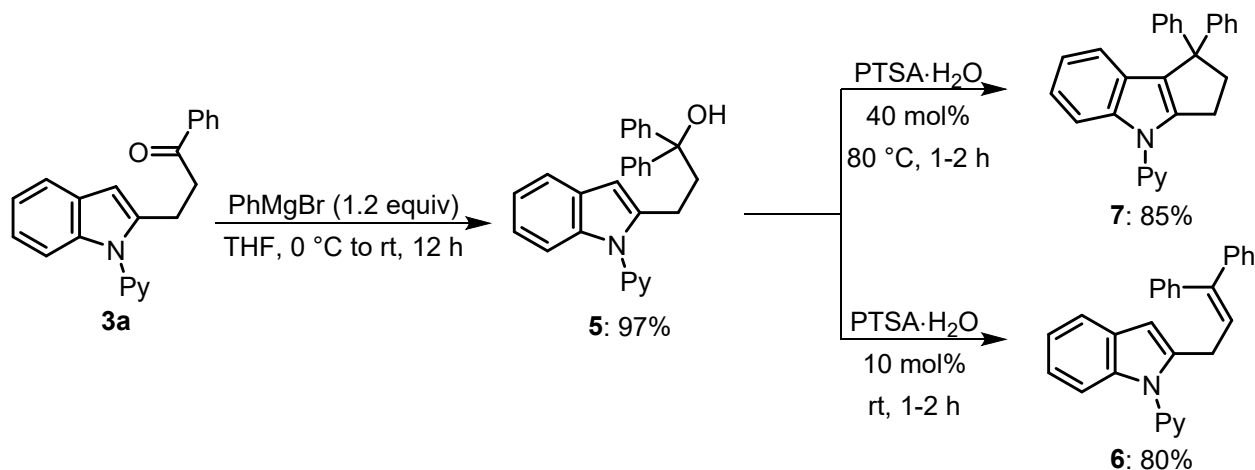

A 25 mL round-bottom flask was charged with alkylated indole **3a** (0.60 mmol, 1.0 equiv) and dry THF (5 mL), subsequently, phenyl magnesium bromide (0.72 mmol, 1.2 equiv) was added dropwise. The reaction mixture was stirred at room temperature. Once the reaction was completed (monitored by TLC), the reaction mixture was quenched with ammonium chloride solution. The mixture was extracted with DCM and washed with water. The collected organic layer was concentrated to get the crude product. The crude product was purified by column chromatography to afford the expected product **5** in 97% yield.

The alcohol **5** was treated with PTSA·H<sub>2</sub>O (10 mol%) in DCE at room temperature for 2 h. The progress of the reaction was monitored by TLC. The reaction mixture was quenched with NaHCO<sub>3</sub> solution. The mixture was extracted with DCM and washed using water. The collected organic layer was concentrated to get the crude product. The crude product was purified by column chromatography through silica gel to afford the expected product **6** in 80% yield.

On the other hand, the mixture of alcohol **5** and 40 mol% of PTSA·H<sub>2</sub>O in DCE was heated at 80 °C for 2 h. After the reaction was completed, the reaction mixture was quenched with NaHCO<sub>3</sub> solution, extracted with DCM and washed with water. The collected organic layer was concentrated to get the crude product. The crude was subjected silica gel column chromatography to give **7** in 85% of yield.

### 7.1 Synthetic of 1-Phenyl-4-(pyridin-2-yl)-1,2,3,4-tetrahydrocyclopenta[*b*]indole (9):

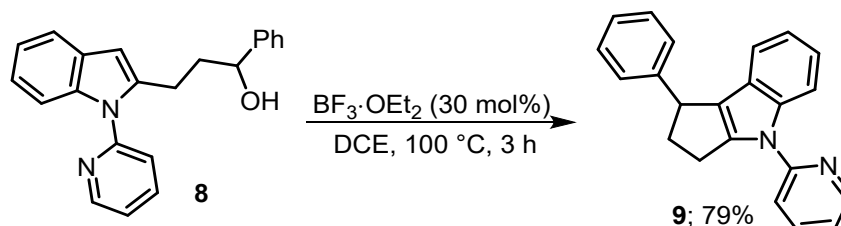

Oven dried 15 mL reaction tube was charged with alcohol **8** (0.15 mmol, 1.0 equiv) and dry DCE (2 mL). Subsequently,  $\text{BF}_3 \cdot \text{OEt}_2$  (0.044 mmol, 50 mol%) was added and closed with stopper. The reaction tube was kept in a preheated oil bath at  $100^\circ\text{C}$ . After completion of the reaction (monitored by TLC), the reaction mixture was cooled to room temperature and quenched with  $\text{NaHCO}_3$  solution, extracted with DCM and washed with water. The collected organic layer was concentrated to get the crude product. The crude product was purified by column chromatography through silica gel to afford the expected product **9** in 79% yield.

### 2-(3,3-Diphenylallyl)-1-(pyridin-2-yl)-1*H*-indole (6):

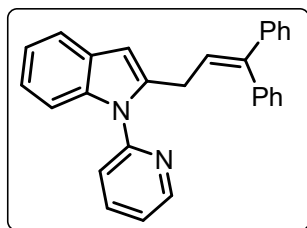

Yield: 80%; yellow liquid;  $R_f = 0.50$  in 1:9 EtOAc/Hexane; IR ( $\nu_{\text{max}}$ ,  $\text{cm}^{-1}$ ): 2939, 1725, 1678, 1403, 1234, 678;  $^1\text{H}$  NMR (400 MHz,  $\text{CDCl}_3$ ,  $24^\circ\text{C}$ ):  $\delta$  8.53 (d,  $J = 4.3$  Hz, 1H), 7.77 (t,  $J = 8.1$  Hz, 1H), 7.57 (dd,  $J = 4.1, 2.4$  Hz, 1H), 7.35-7.27 (m, 5H), 7.26-7.19 (m, 5H), 7.16-7.11 (m, 5H), 6.53 (s, 1H), 6.16 (t,  $J = 7.6$  Hz, 1H), 3.70 (d,  $J = 7.6$  Hz, 2H);  $^{13}\text{C}\{^1\text{H}\}$  NMR (100 MHz,  $\text{CDCl}_3$ ,  $24^\circ\text{C}$ ):  $\delta$  159.4, 149.7, 143.2, 142.6, 139.9, 139.5, 138.4, 137.5, 129.9, 128.7, 128.3, 128.2, 127.6, 127.3, 127.2, 125.5, 122.0, 121.9, 121.0, 120.8, 120.2, 110.4, 103.2, 28.7; HRMS: (ESI)  $m/z$  calcd. for  $\text{C}_{28}\text{H}_{22}\text{N}_2$ , 387.1856  $[\text{M}+\text{H}]^+$ ; found 387.1857.

### 1,1-Diphenyl-4-(pyridin-2-yl)-1,2,3,4-tetrahydrocyclopenta[*b*]indole (7):

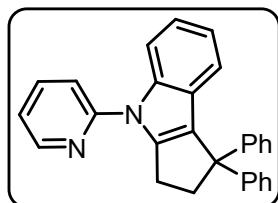

Yield: 85%; yellow liquid;  $R_f = 0.50$  in 1:9 EtOAc/Hexane; IR ( $\nu_{\text{max}}$ ,  $\text{cm}^{-1}$ ): 2922, 1735, 1567, 1471, 1224, 750;  $^1\text{H}$  NMR (400 MHz,  $\text{CDCl}_3$ ,  $24^\circ\text{C}$ ):  $\delta$  8.46 (d,  $J = 4.6$  Hz, 1H), 7.85 (t,  $J = 8.3$  Hz, 1H), 7.67 (t,  $J = 8.0$  Hz, 1H), 7.33 (d,  $J = 7.3$  Hz, 1H), 7.32-7.27 (m, 4H), 7.24 (d,  $J = 8.0$  Hz, 1H), 7.20-7.13 (m, 4H), 7.12-6.94 (m, 5H), 3.18 (t,  $J = 6.9$  Hz, 2H), 3.09 (t,  $J = 7.6$  Hz, 2H);  $^{13}\text{C}\{^1\text{H}\}$  NMR (100 MHz,  $\text{CDCl}_3$ ,  $24^\circ\text{C}$ ):  $\delta$  152.2, 149.2, 148.3, 143.8, 142.5, 140.2, 138.3,

137.8, 128.2, 127.9, 127.6, 126.0, 125.6, 122.7, 121.9, 121.3, 120.4, 119.5, 116.5, 112.8, 57.4, 47.3, 27.8; HRMS: (ESI)  $m/z$  calcd. for  $C_{28}H_{22}N_2$ , 387.1856  $[M+H]^+$ ; found 387.1853.

**1,1-Diphenyl-4-(pyridin-2-yl)-1,2,3,4-tetrahydrocyclopenta[*b*]indole (9):**

Yield: 79%; yellow liquid;  $R_f$  = 0.50 in 1:9 EtOAc/Hexane; IR ( $\nu_{max}$ ,  $cm^{-1}$ ): 2990, 1656, 1555,

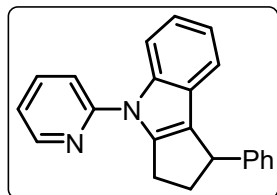

1445, 1224, 750;  $^1H$  NMR (400 MHz,  $CDCl_3$ , 24 °C):  $\delta$  8.54 (d,  $J$  = 4.4 Hz, 1H), 7.94 (d,  $J$  = 8.0 Hz, 1H), 7.78 (t,  $J$  = 8.3 Hz, 1H), 7.45 (d,  $J$  = 8.3 Hz, 1H), 7.26 (d,  $J$  = 3.6 Hz, 1H), 7.21-7.20 (m, 3H), 7.18-7.08 (m, 4H), 7.00 (t,  $J$  = 7.9 Hz, 1H), 4.46 (t,  $J$  = 8.5 Hz, 1H), 3.28-3.18 (m, 1H),

3.14-2.98 (m, 2H), 2.41-2.32 (m,  $^1H$ );  $^{13}C$  { $^1H$ } NMR (100 MHz,  $CDCl_3$ , 24 °C):  $\delta$  152.5, 149.3, 145.8, 145.2, 140.4, 138.3, 128.5, 127.5, 126.6, 125.7, 124.6, 121.9, 121.1, 120.2, 119.0, 116.1, 112.8, 44.5, 40.0, 27.8; HRMS: (ESI)  $m/z$  calcd. for  $C_{22}H_{18}N_2$ , 333.1362  $[M+Na]^+$ ; found 333.1357.



## 8. Spectral data

### 3-(1*H*-Indol-2-yl)-1-phenylpropan-1-one: **3a**

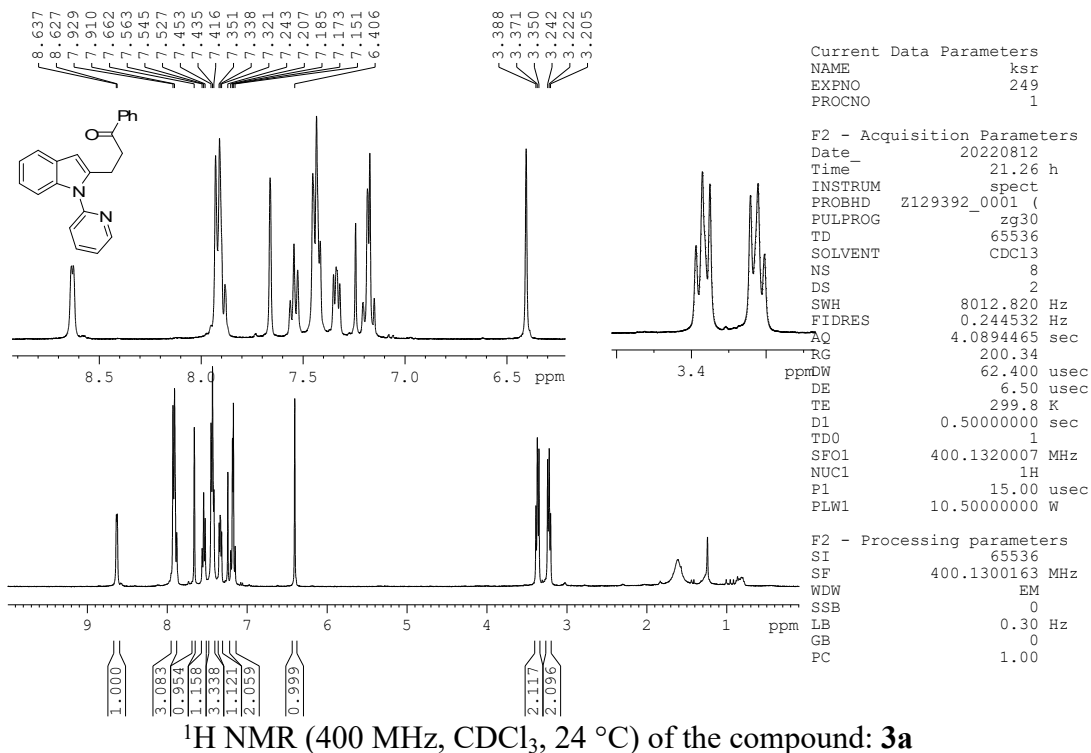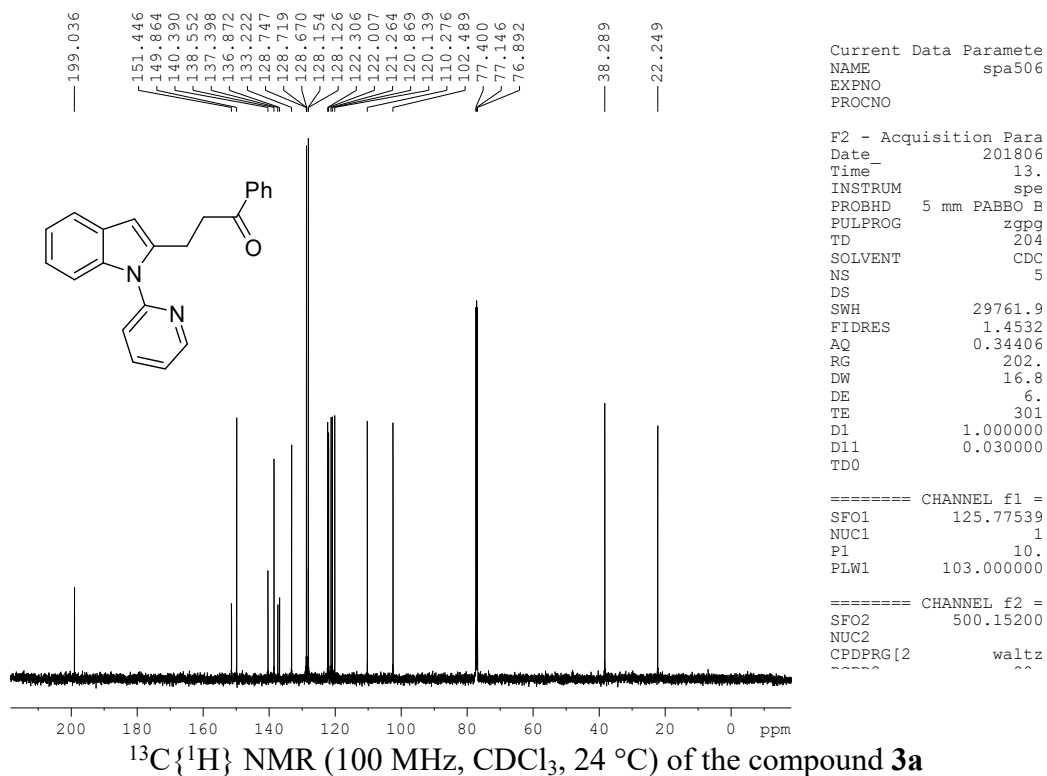

**3-(5-Methyl-1-(pyridin-2-yl)-1H-indol-2-yl)-1-phenylpropan-1-one: 3b**

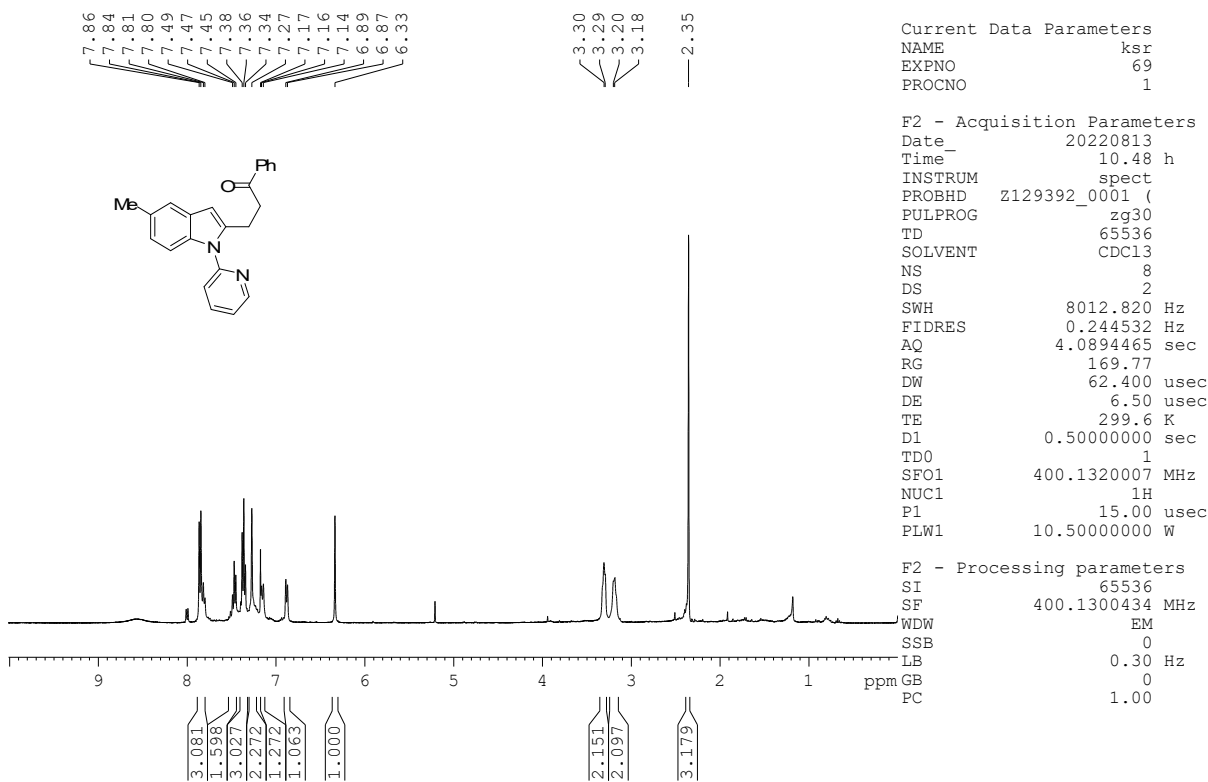

**<sup>1</sup>H NMR (400 MHz, CDCl<sub>3</sub>, 24 °C) of the compound: 3b**

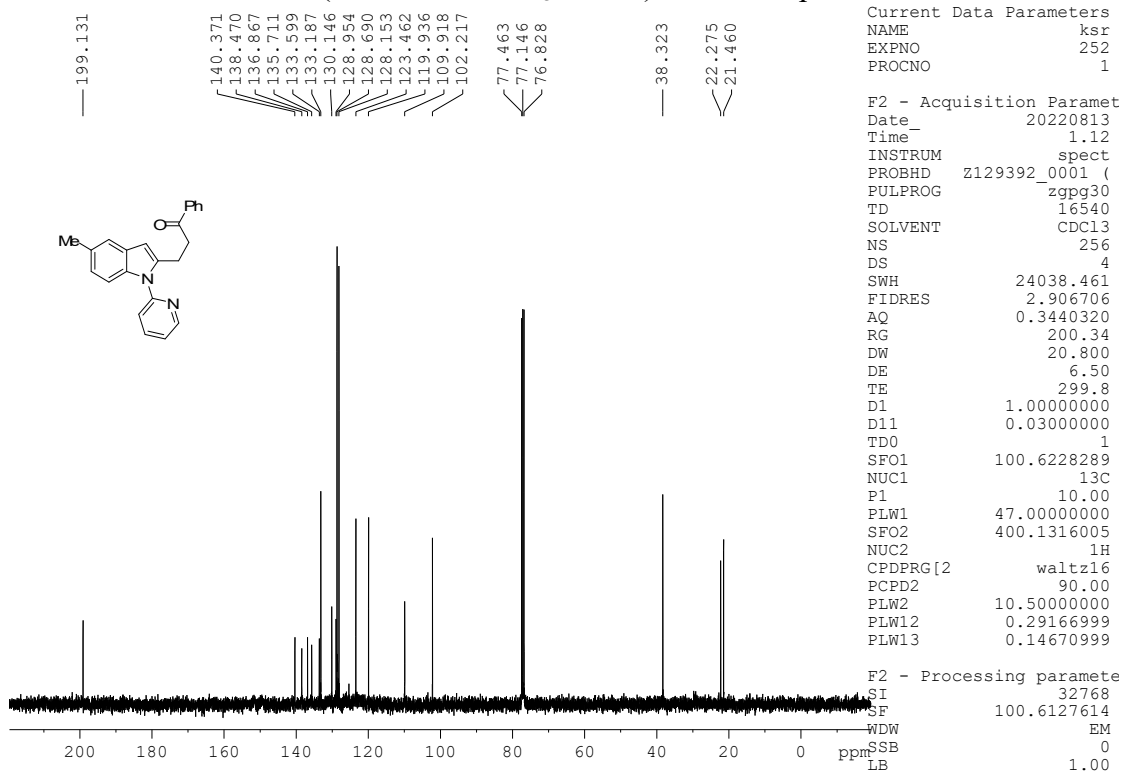

**<sup>13</sup>C{<sup>1</sup>H} NMR (100 MHz, CDCl<sub>3</sub>, 24 °C) of the compound 3b**

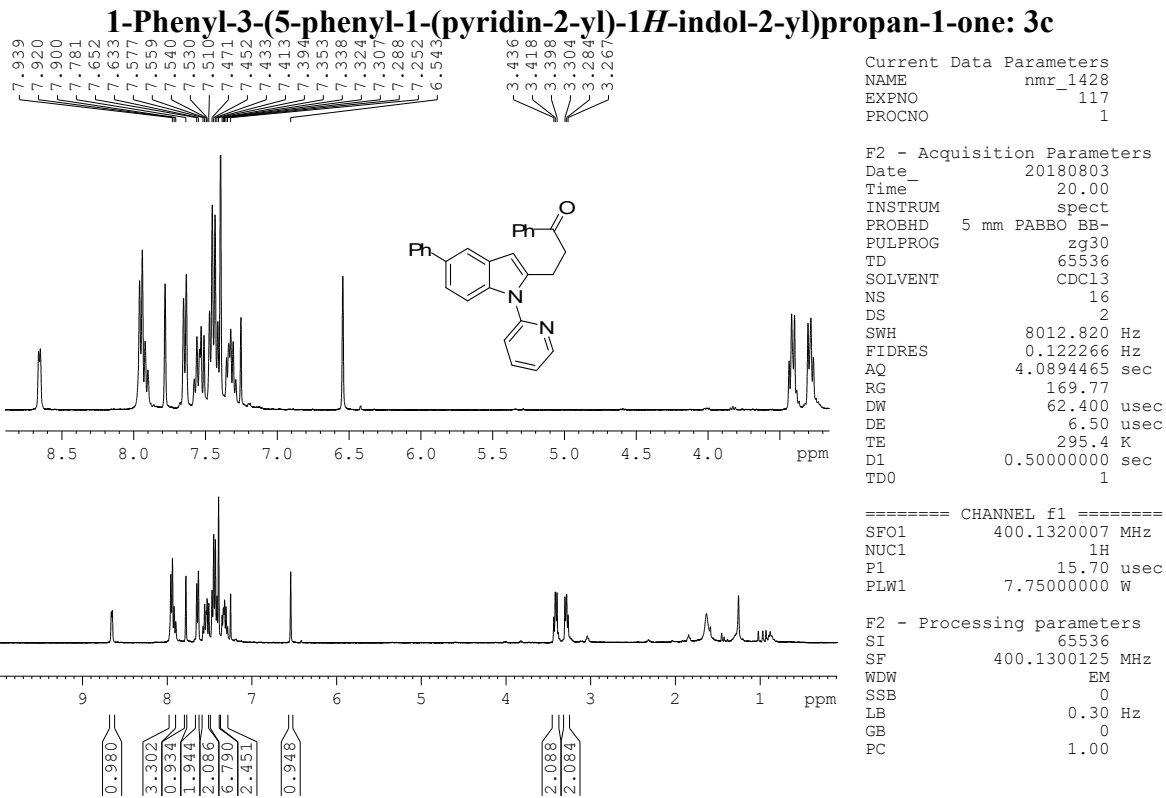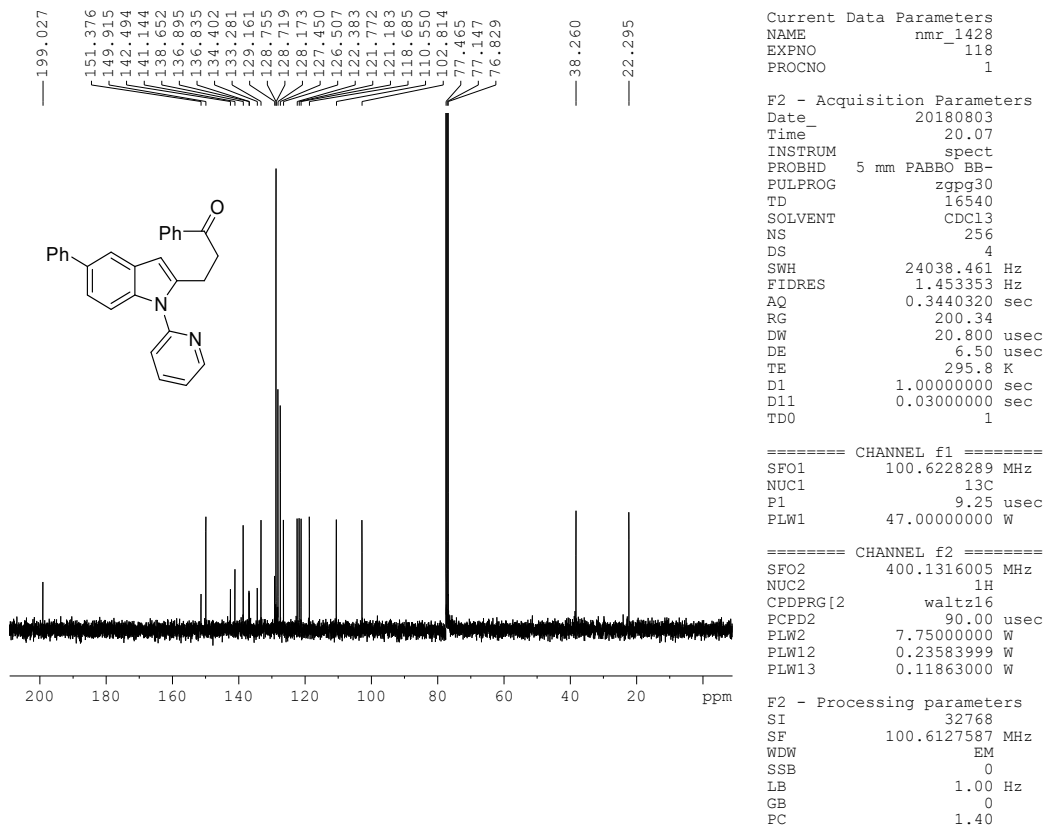

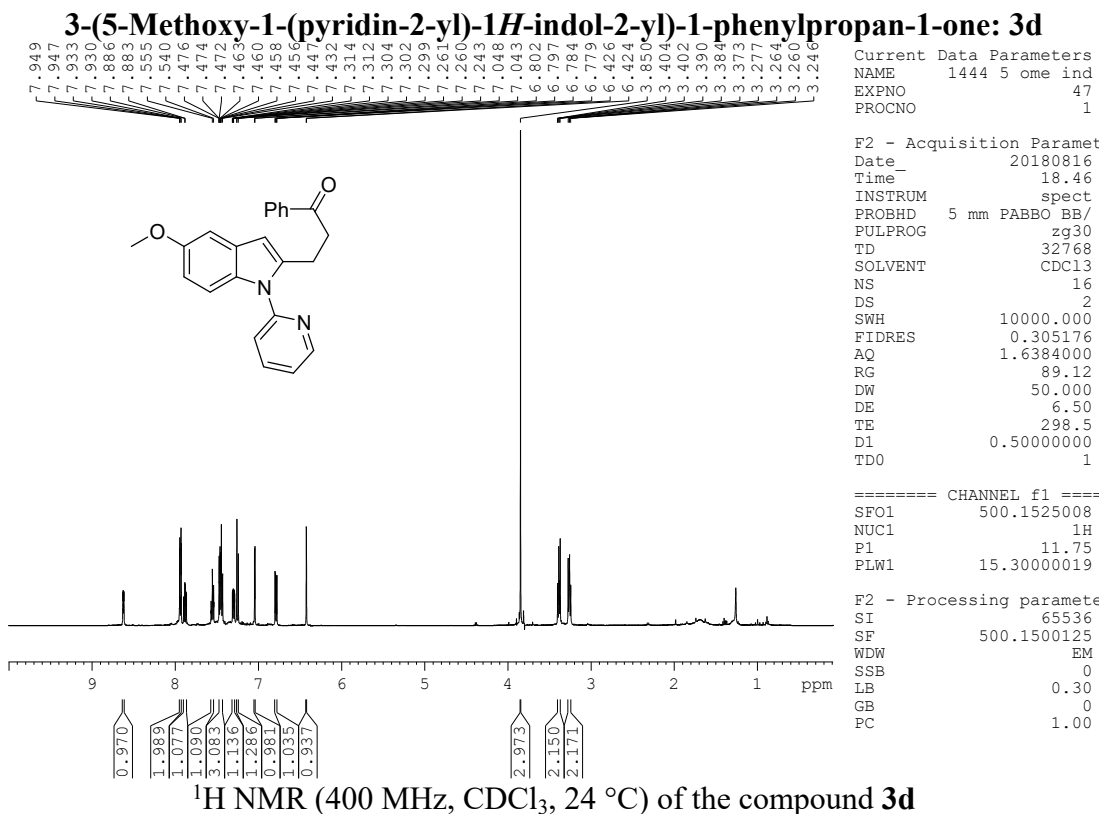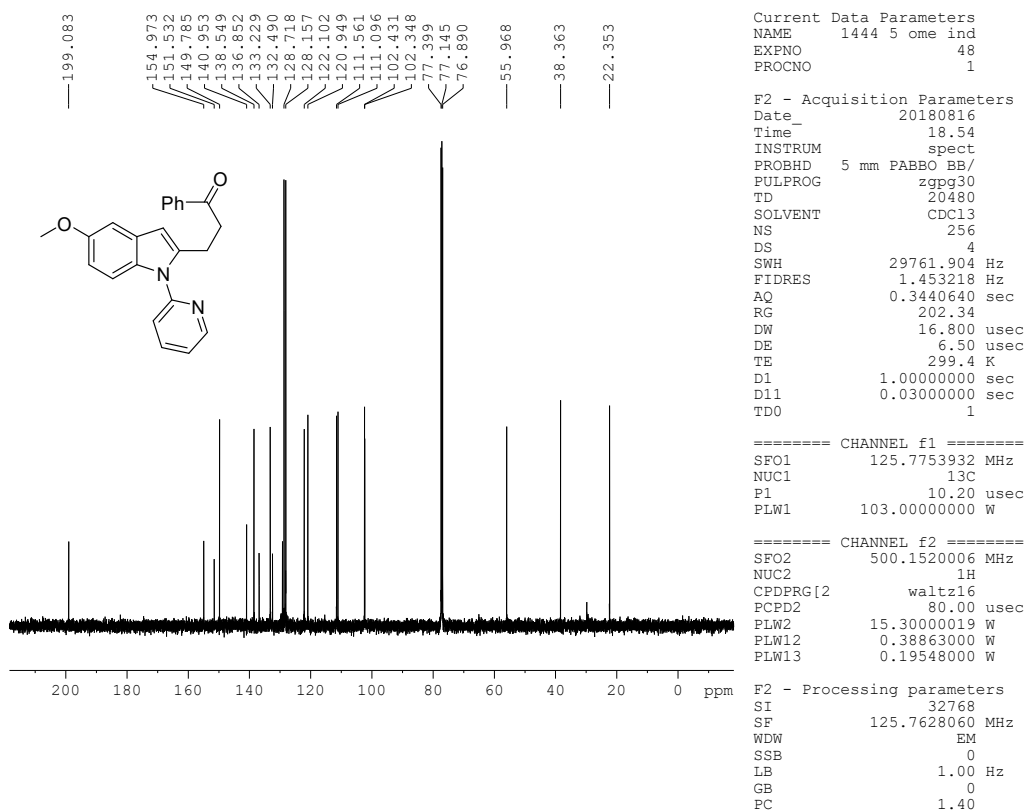

**3-(5-Chloro-1-(pyridin-2-yl)-1H-indol-2-yl)-1-phenylpropan-1-one: 3e**

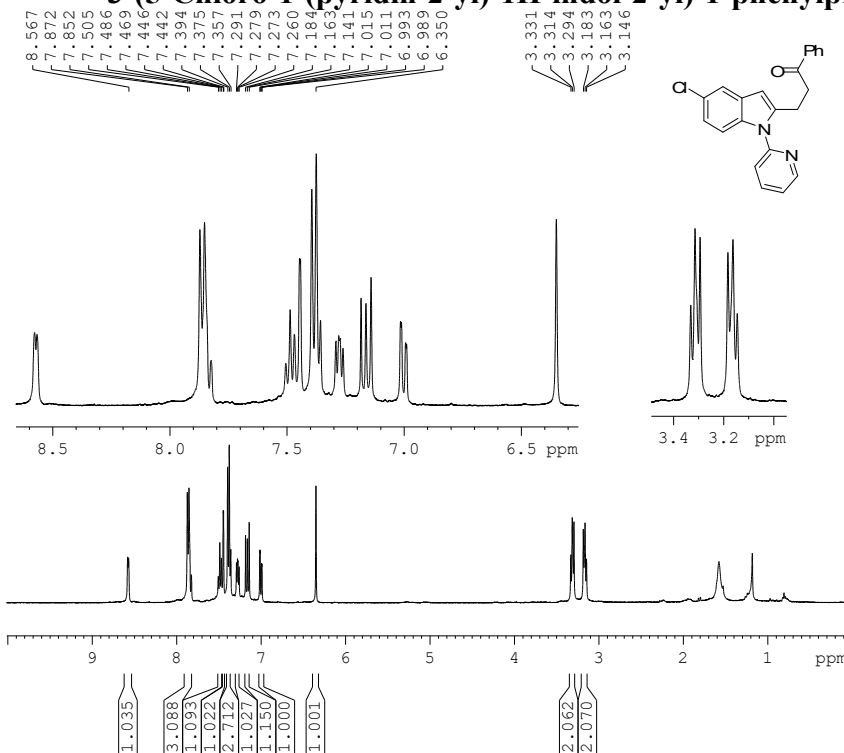

Current Data Parameters  
 NAME 2779 5CL IND cy oh  
 EXPNO 171  
 PROCNO 1

F2 - Acquisition Parameters  
 Date\_ 20211209  
 Time\_ 1.24 h  
 INSTRUM spect  
 PROBHD Z129392\_0001 (  
 PULPROG zg30  
 TD 65536  
 SOLVENT CDCl3  
 NS 16  
 DS 2  
 SWH 8012.820 Hz  
 FIDRES 0.244532 Hz  
 AQ 4.0894465 sec  
 RG 200.34  
 DW 62.400 usec  
 DE 6.50 usec  
 TE 298.7 K  
 D1 0.50000000 sec  
 TD0 1  
 SFO1 400.1320007 MHz  
 NUC1 1H  
 P1 15.00 usec  
 PLW1 10.50000000 W

F2 - Processing parameters  
 SI 65536  
 SF 400.1300401 MHz  
 WDW EM  
 SSB 0  
 LB 0.30 Hz  
 GB 0  
 PC 1.00

<sup>1</sup>H NMR (400 MHz, CDCl<sub>3</sub>, 24 °C) of the compound: 3e

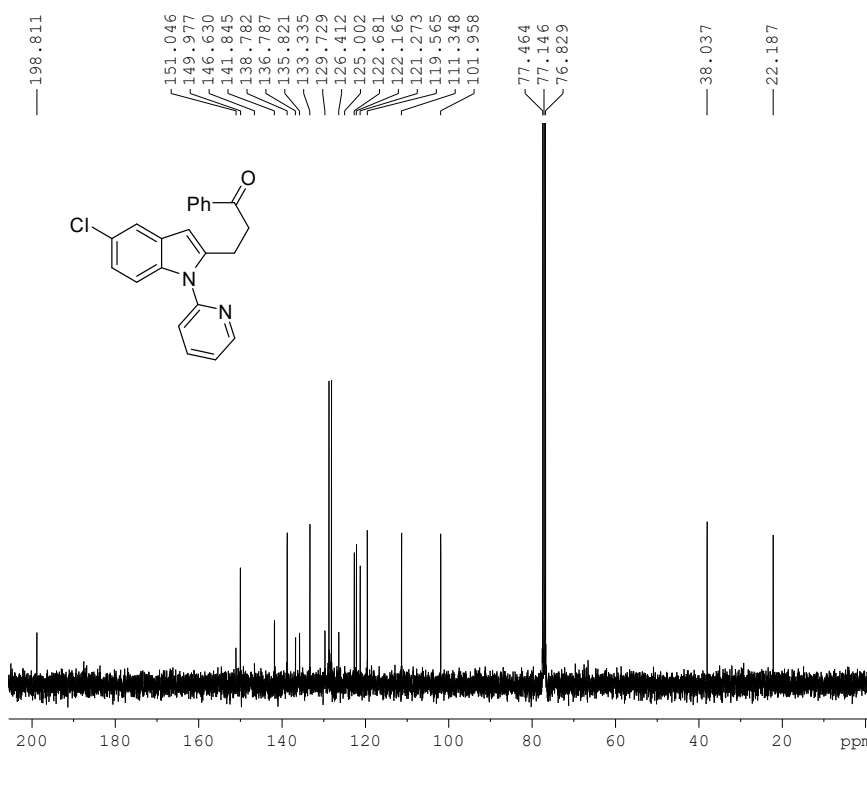

Current Data Parameters  
 NAME 2779 5CL IND cy oh  
 EXPNO 172  
 PROCNO 1

F2 - Acquisition Parameters  
 Date\_ 20211209  
 Time\_ 1.31 h  
 INSTRUM spect  
 PROBHD Z129392\_0001 (  
 PULPROG zgpg30  
 TD 16540  
 SOLVENT CDCl3  
 NS 256  
 DS 4  
 SWH 24038.461 Hz  
 FIDRES 2.906706 Hz  
 AQ 0.3440320 sec  
 RG 200.34  
 DW 20.800 usec  
 DE 6.50 usec  
 TE 298.8 K  
 D1 1.00000000 sec  
 D11 0.03000000 sec  
 TD0 1  
 SFO1 100.6228289 MHz  
 NUC1 13C  
 P1 10.00 usec  
 PLW1 47.00000000 W  
 SFO2 400.1316005 MHz  
 NUC2 1H  
 CPDPRG[2] waltz16  
 PCPD2 90.00 usec  
 PLW2 10.50000000 W  
 PLW12 0.29166999 W  
 PLW13 0.14670999 W

F2 - Processing parameters  
 SI 32768  
 SF 100.6127571 MHz  
 WDW EM  
 SSB 0  
 LB 1.00 Hz  
 GB 0  
 PC 1.40

<sup>13</sup>C{<sup>1</sup>H} NMR (100 MHz, CDCl<sub>3</sub>, 24 °C) of the compound 3e

**3-(5-Bromo-1-(pyridin-2-yl)-1H-indol-2-yl)-1-phenylpropan-1-one: 3f**

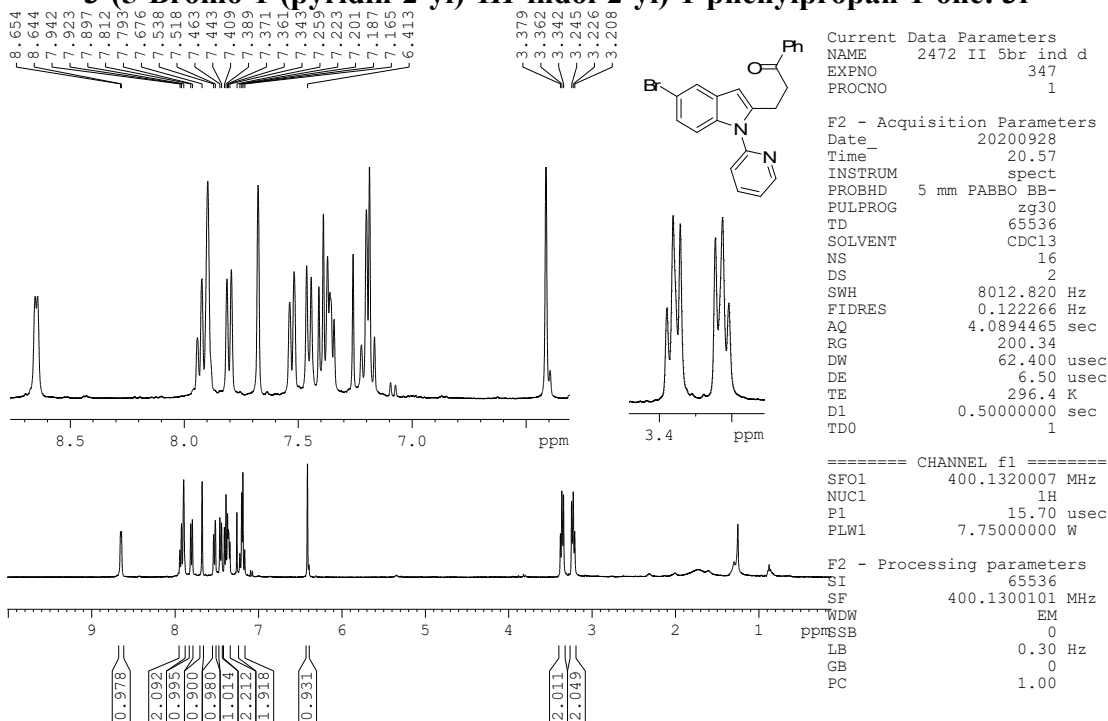

<sup>1</sup>H NMR (400 MHz, CDCl<sub>3</sub>, 24 °C) of the compound **3f**

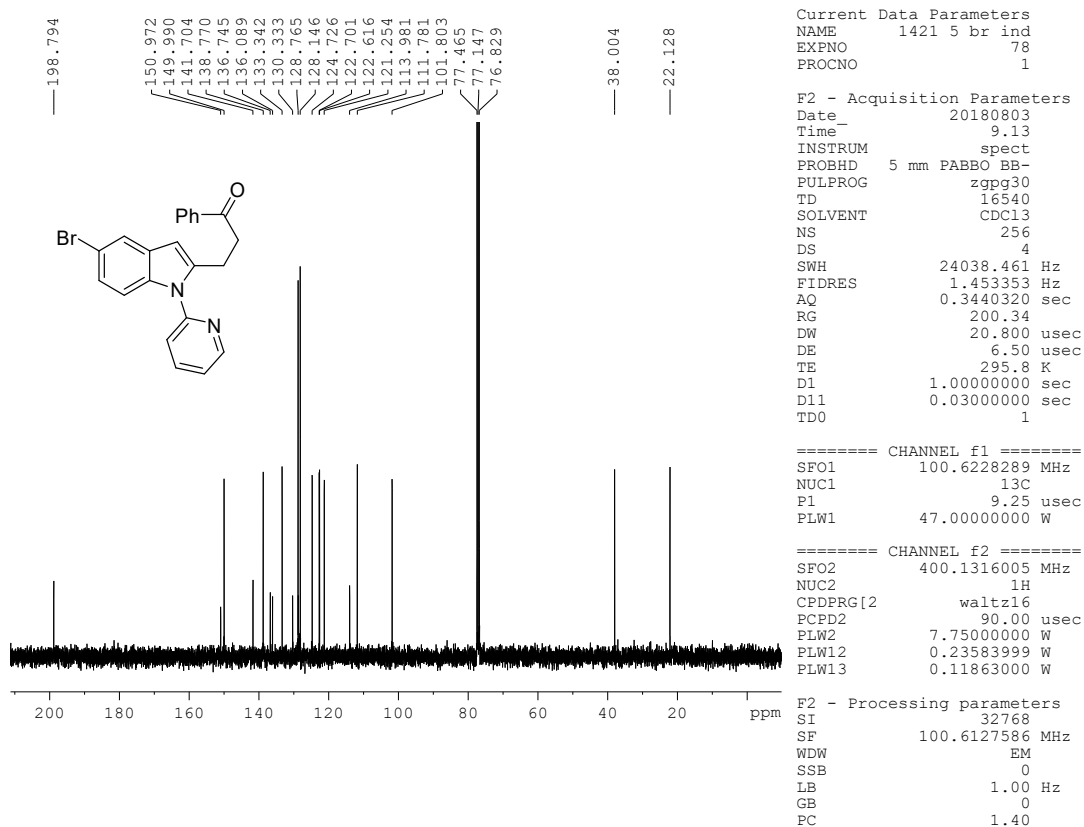

<sup>13</sup>C{<sup>1</sup>H} NMR (100 MHz, CDCl<sub>3</sub>, 24 °C) of the compound **3f**

**3-(6-Chloro-1-(pyridin-2-yl)-1H-indol-2-yl)-1-phenylpropan-1-one: 3g**

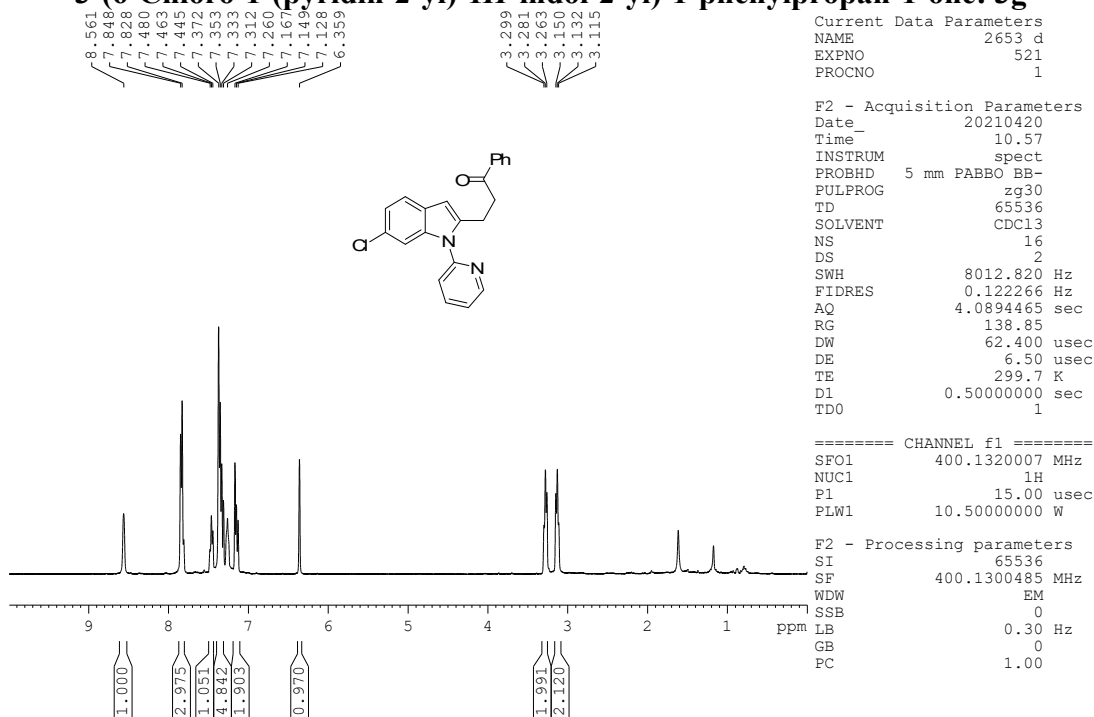

**<sup>1</sup>H NMR (400 MHz, CDCl<sub>3</sub>, 24 °C) of the compound 3g**

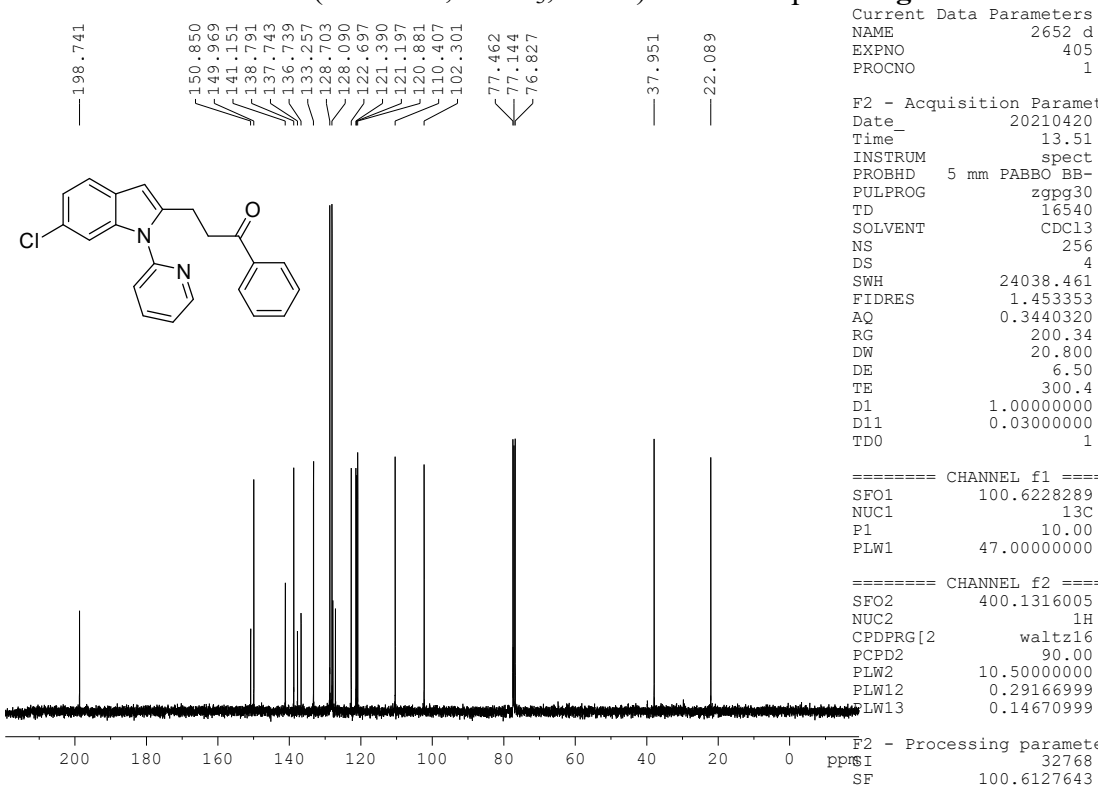

**<sup>13</sup>C{<sup>1</sup>H} NMR (100 MHz, CDCl<sub>3</sub>, 24 °C) of the compound 3g**

**3-(6-Bromo-1-(pyridin-2-yl)-1H-indol-2-yl)-1-phenylpropan-1-one: 3h**

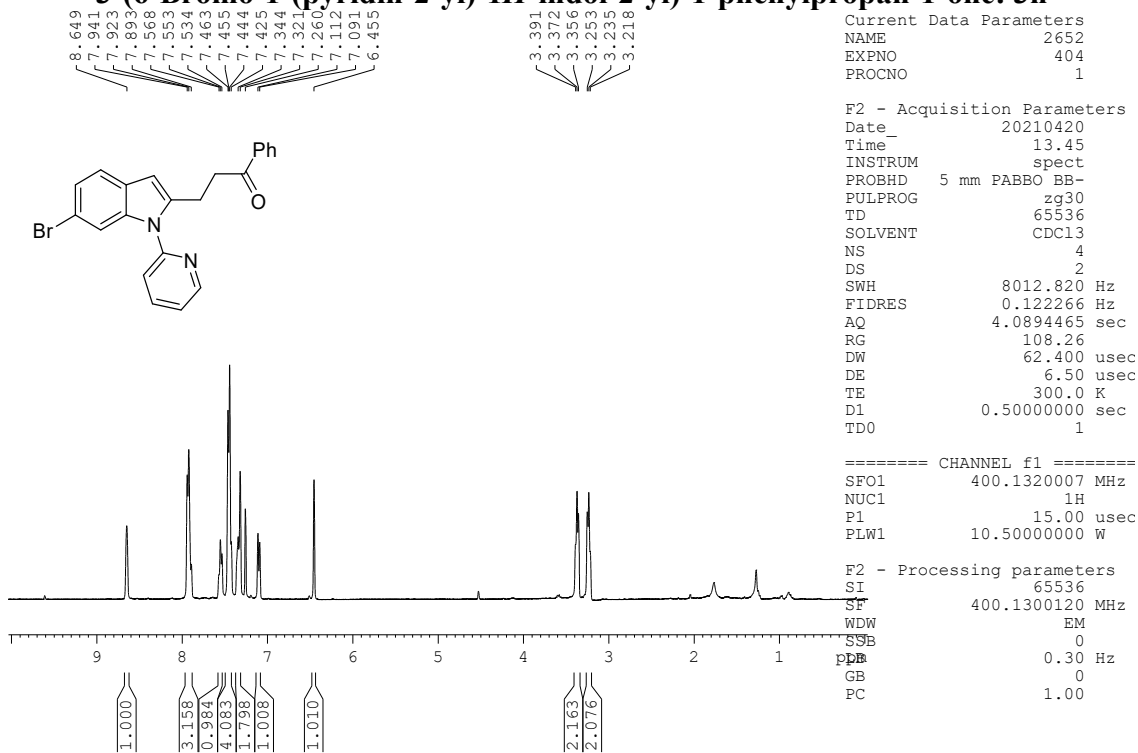

<sup>1</sup>H NMR (400 MHz, CDCl<sub>3</sub>, 24 °C) of the compound **3h**

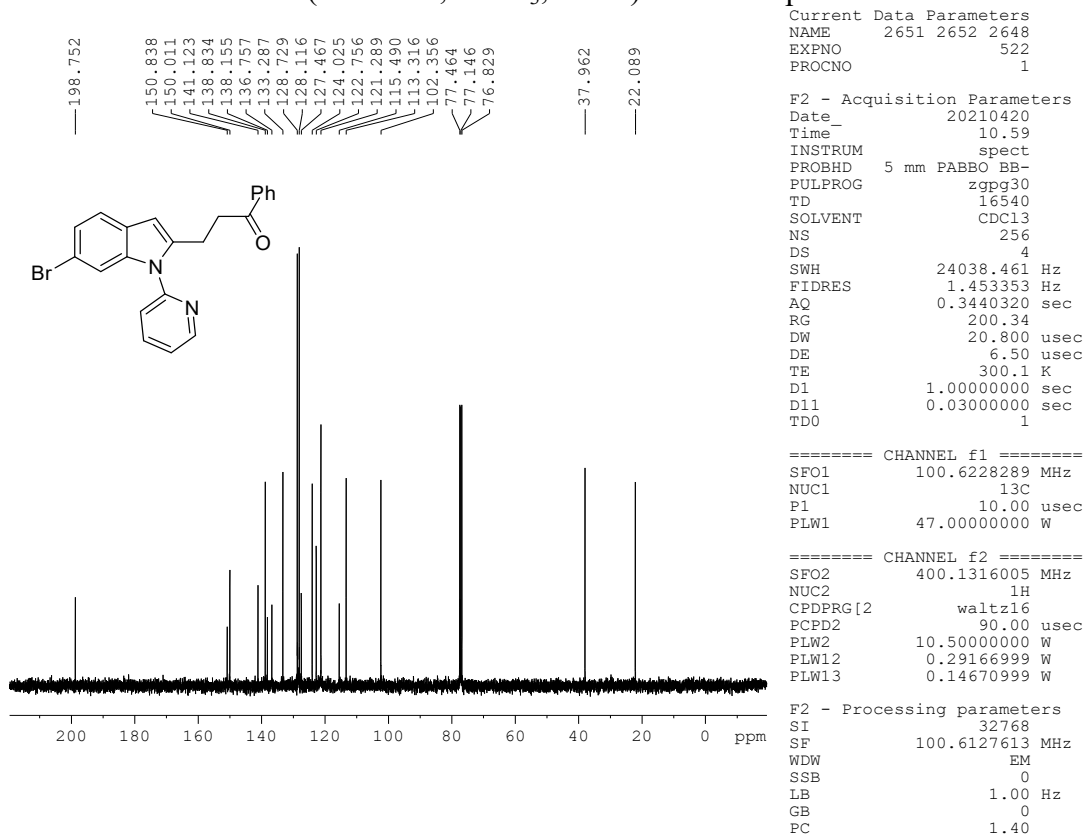

<sup>13</sup>C{<sup>1</sup>H} NMR (100 MHz, CDCl<sub>3</sub>, 24 °C) of the compound **3h**



### 3-(4-Bromo-1-(pyridin-2-yl)-1H-indol-2-yl)-1-phenylpropan-1-one: 3i

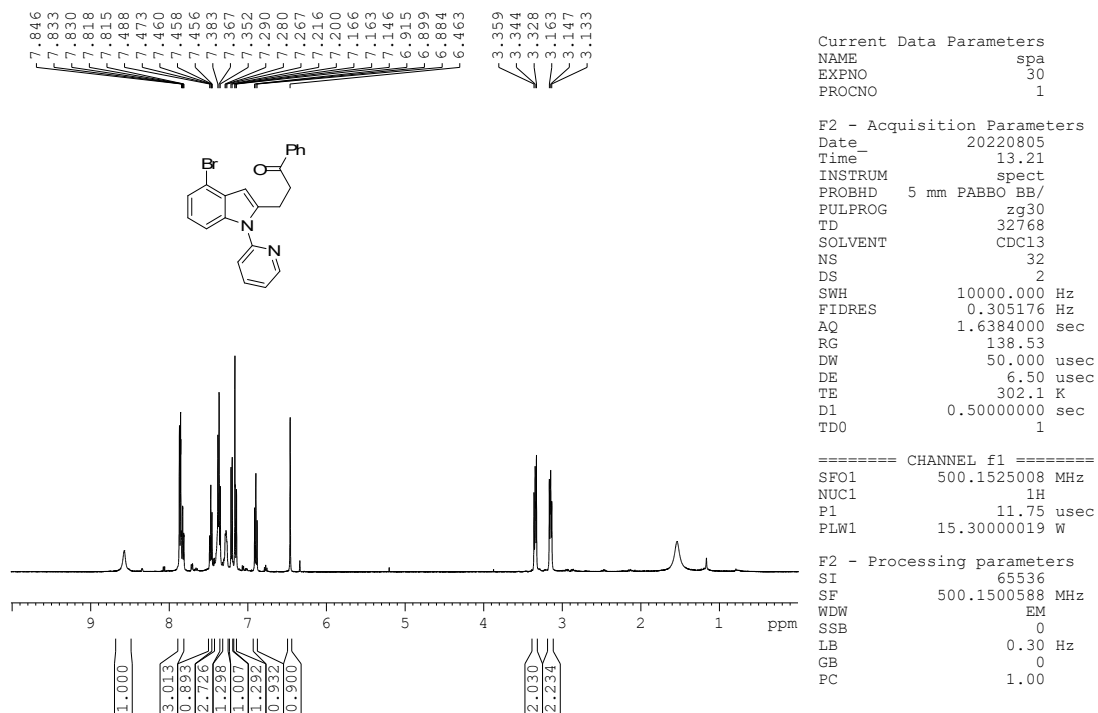

<sup>1</sup>H NMR (400 MHz, CDCl<sub>3</sub>, 24 °C) of the compound 3i

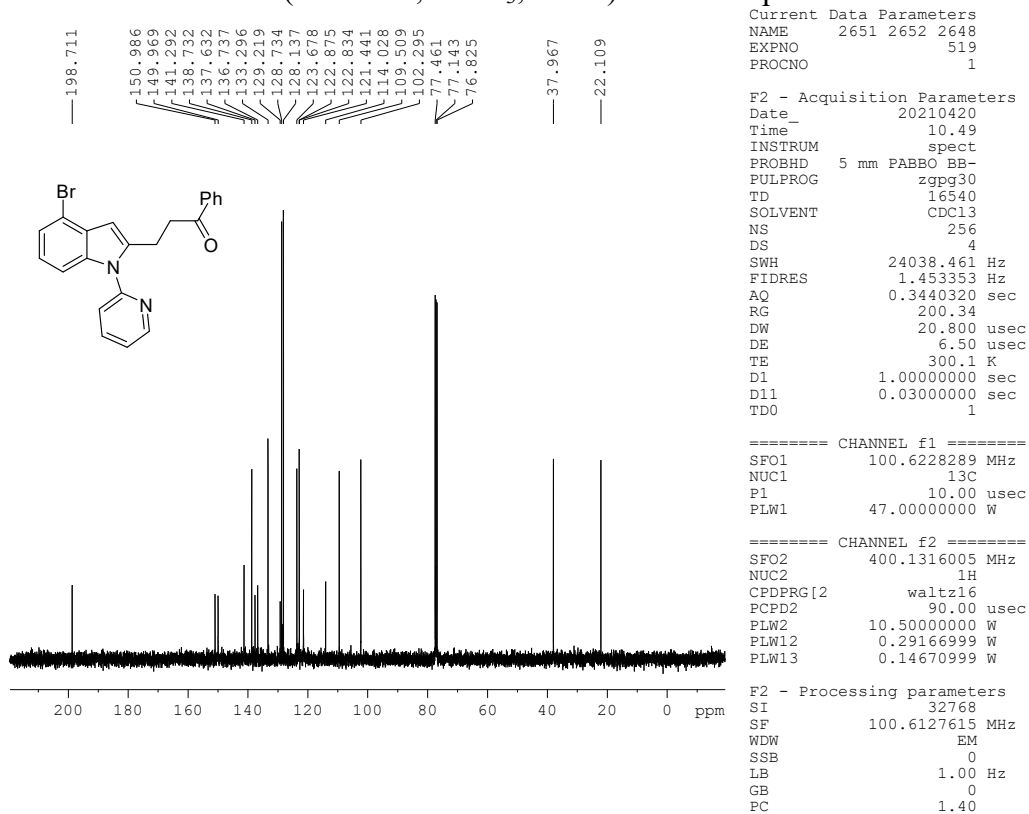

<sup>13</sup>C{<sup>1</sup>H} NMR (100 MHz, CDCl<sub>3</sub>, 24 °C) of the compound 3i

**Methyl 2-(3-oxo-3-phenylpropyl)-1-(pyridin-2-yl)-1H-indole-5-carboxylate: 3j**

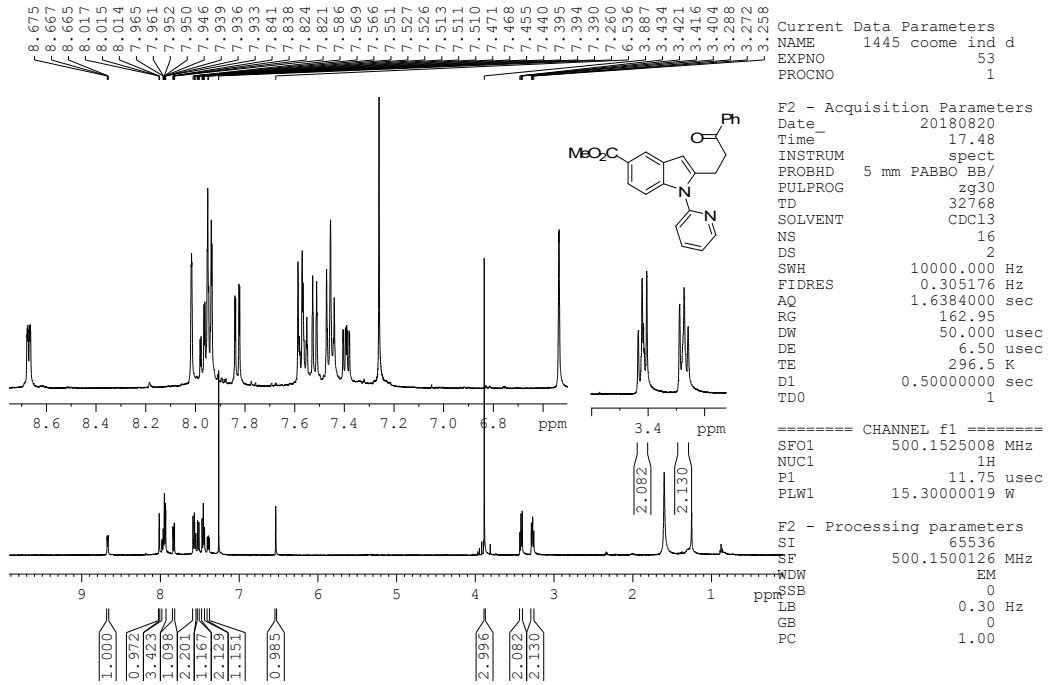

<sup>1</sup>H NMR (400 MHz, CDCl<sub>3</sub>, 24 °C) of the compound **3j**

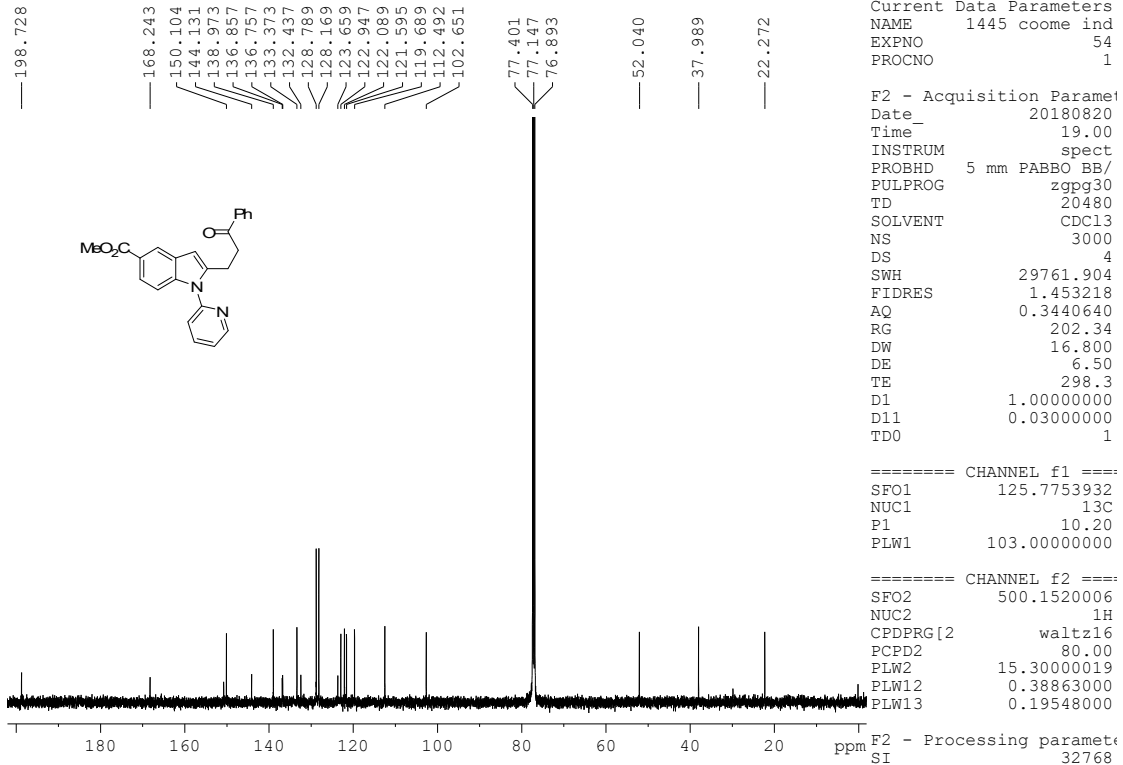

<sup>13</sup>C{<sup>1</sup>H} NMR (100 MHz, CDCl<sub>3</sub>, 24 °C) of the compound **3j**

**1-Phenyl-3-(1-(pyridin-2-yl)-5-(thiophen-2-yl)-1H-indol-2-yl)propan-1-one: 3k**

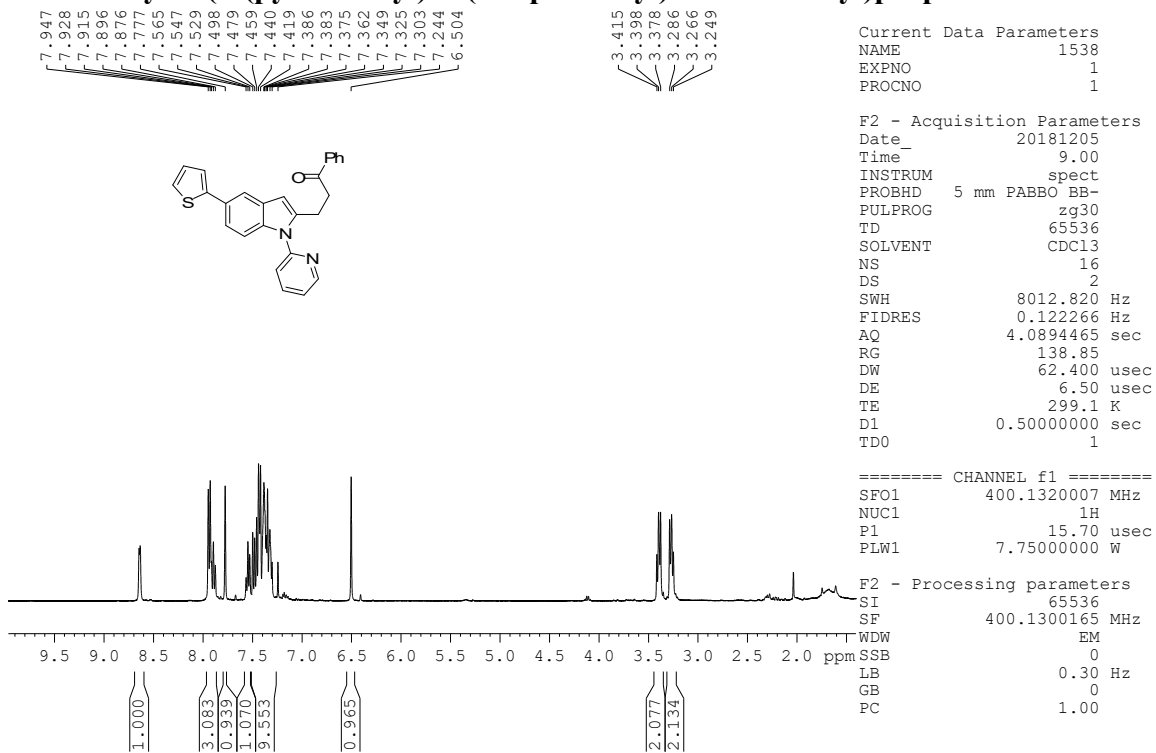

**<sup>1</sup>H NMR (400 MHz, CDCl<sub>3</sub>, 24 °C) of the compound 3k**

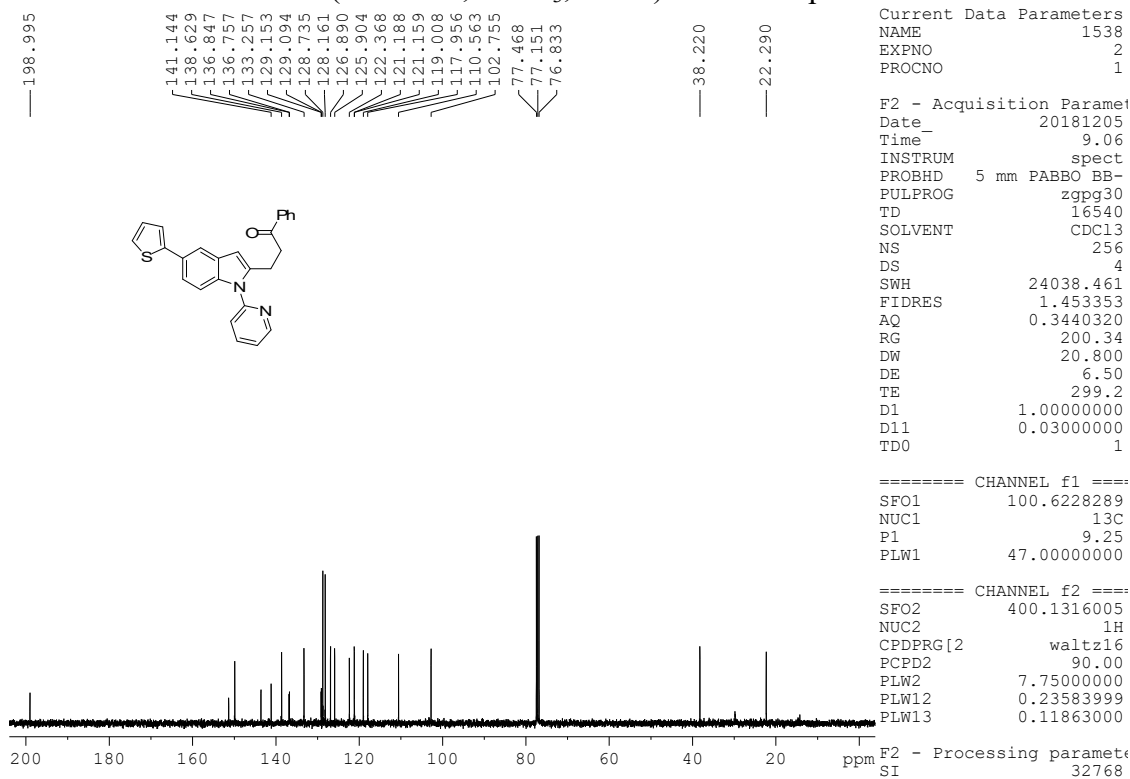

**<sup>13</sup>C{<sup>1</sup>H} NMR (100 MHz, CDCl<sub>3</sub>, 24 °C) of the compound 3k**

### 3-(3-Methyl-1-(pyridin-2-yl)-1H-indol-2-yl)-1-phenylpropan-1-one: 3l

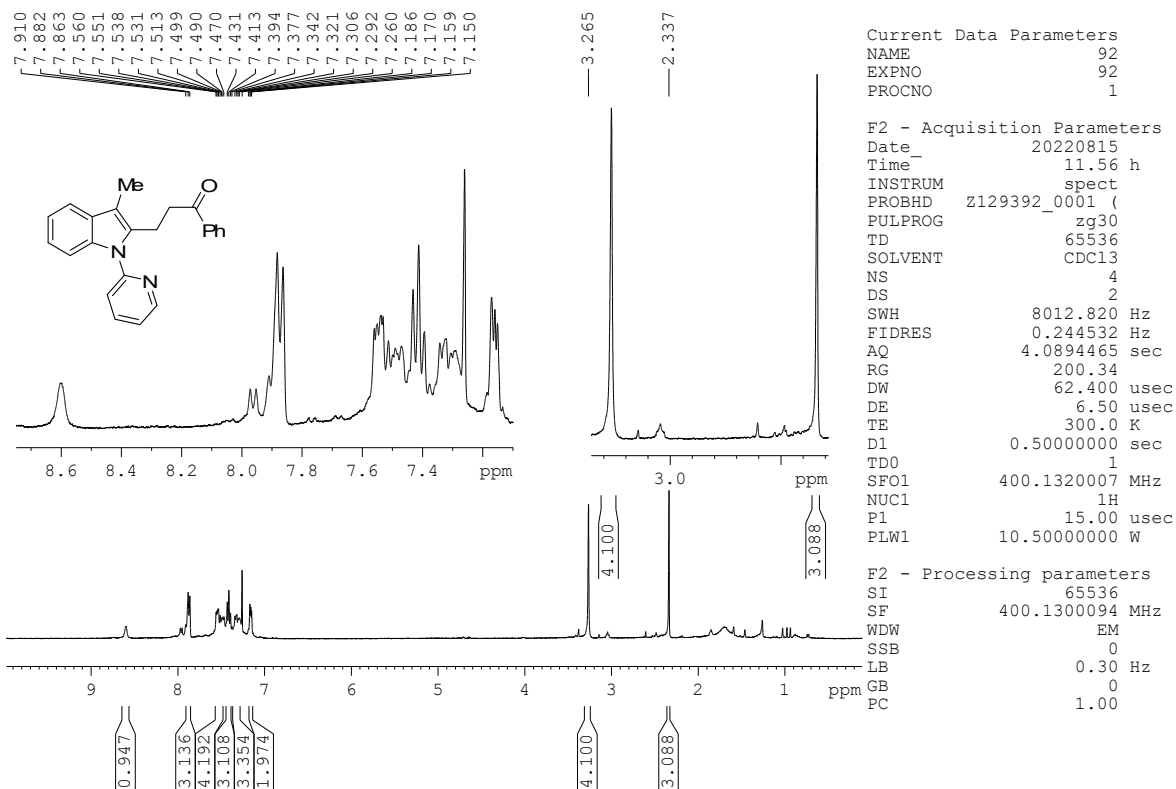

### <sup>1</sup>H NMR (400 MHz, CDCl<sub>3</sub>, 24 °C) of the compound 3l

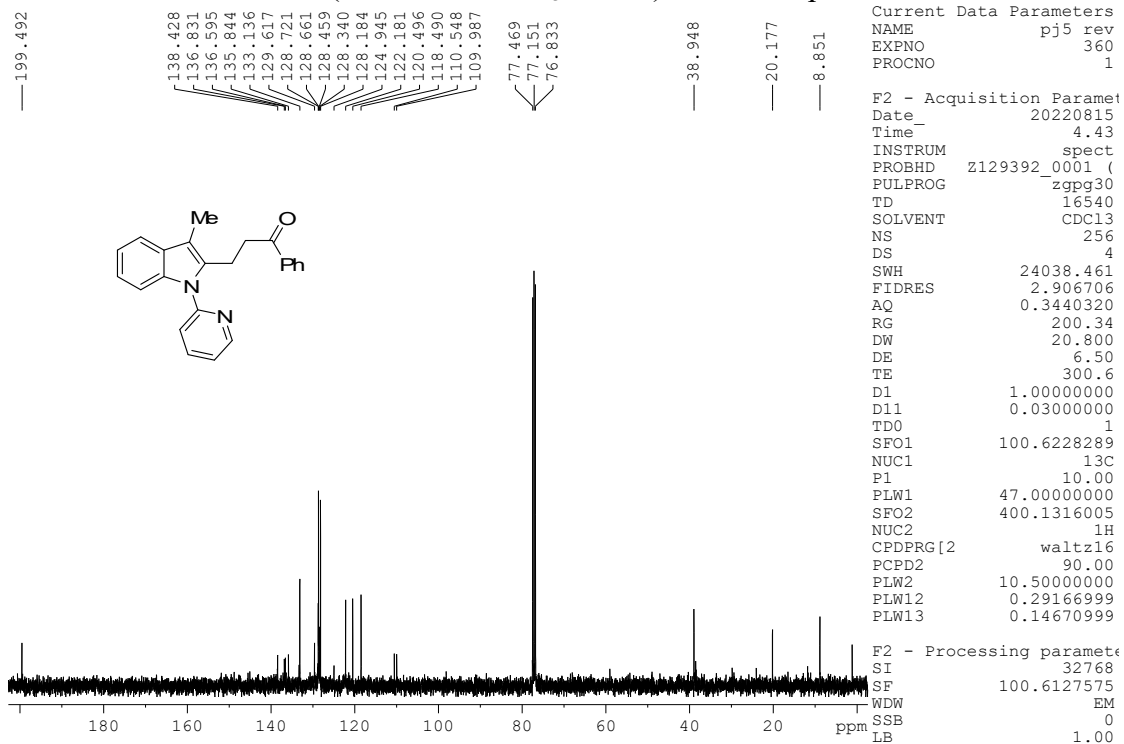

### <sup>13</sup>C{<sup>1</sup>H} NMR (100 MHz, CDCl<sub>3</sub>, 24 °C) of the compound 3l

### 3-(3-Chloro-5-methoxy-1-(pyridin-2-yl)-1H-indol-2-yl)-1-phenylpropan-1-one: **3m**

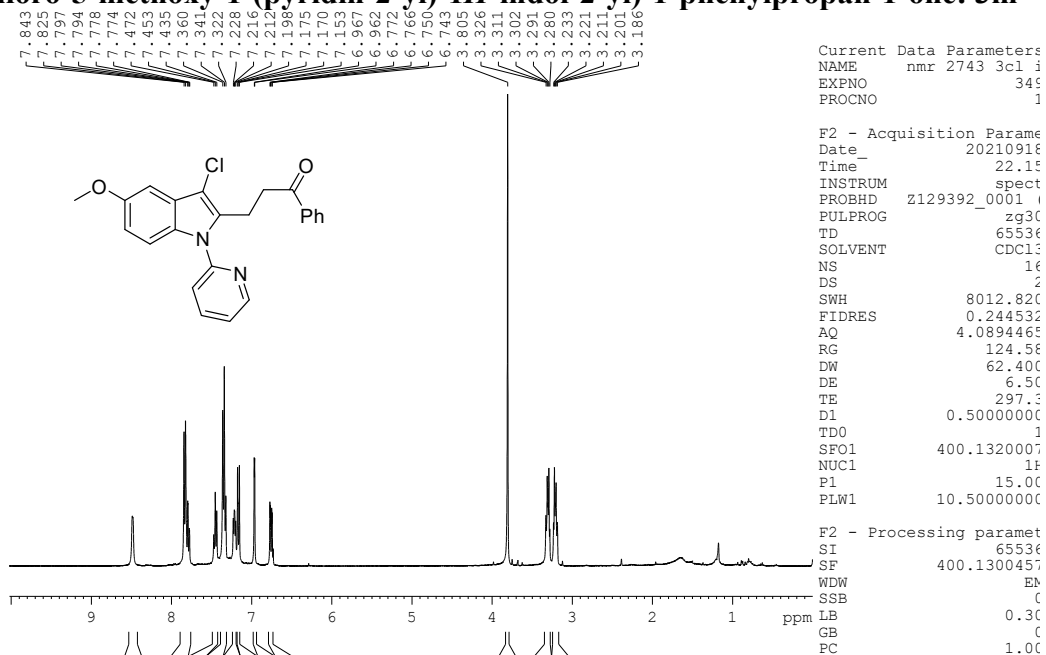

<sup>1</sup>H NMR (400 MHz, CDCl<sub>3</sub>, 24 °C) of the compound **3m**

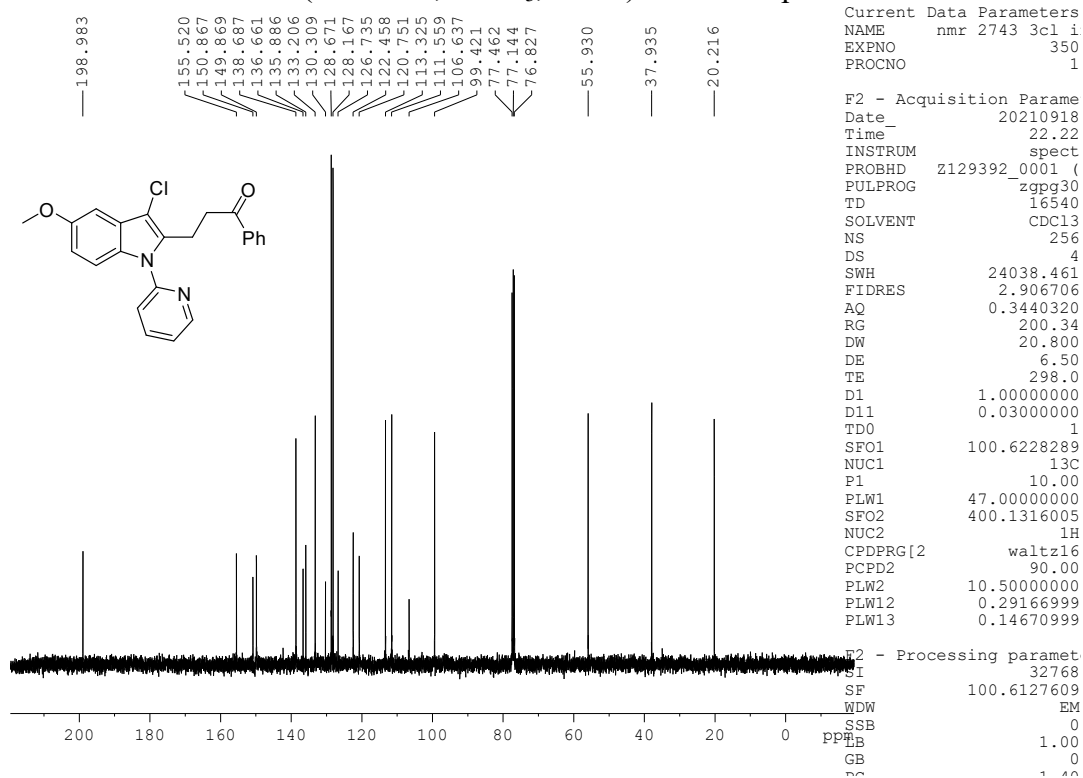

<sup>13</sup>C{<sup>1</sup>H} NMR (100 MHz, CDCl<sub>3</sub>, 24 °C) of the compound **3m**

### 3-(3-(4-Methoxyphenyl)-1-(pyridin-2-yl)-1H-indol-2-yl)-1-phenylpropan-1-one: 3n

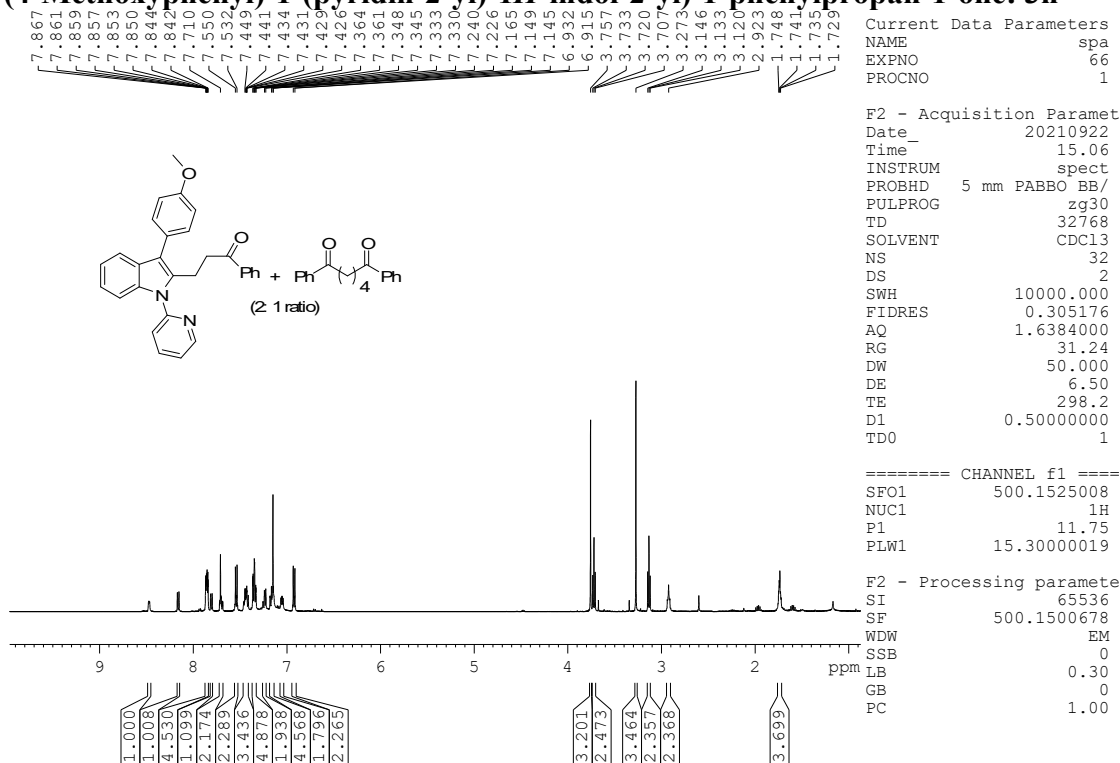

<sup>1</sup>H NMR (400 MHz, CDCl<sub>3</sub>, 24 °C) of the compound 3n

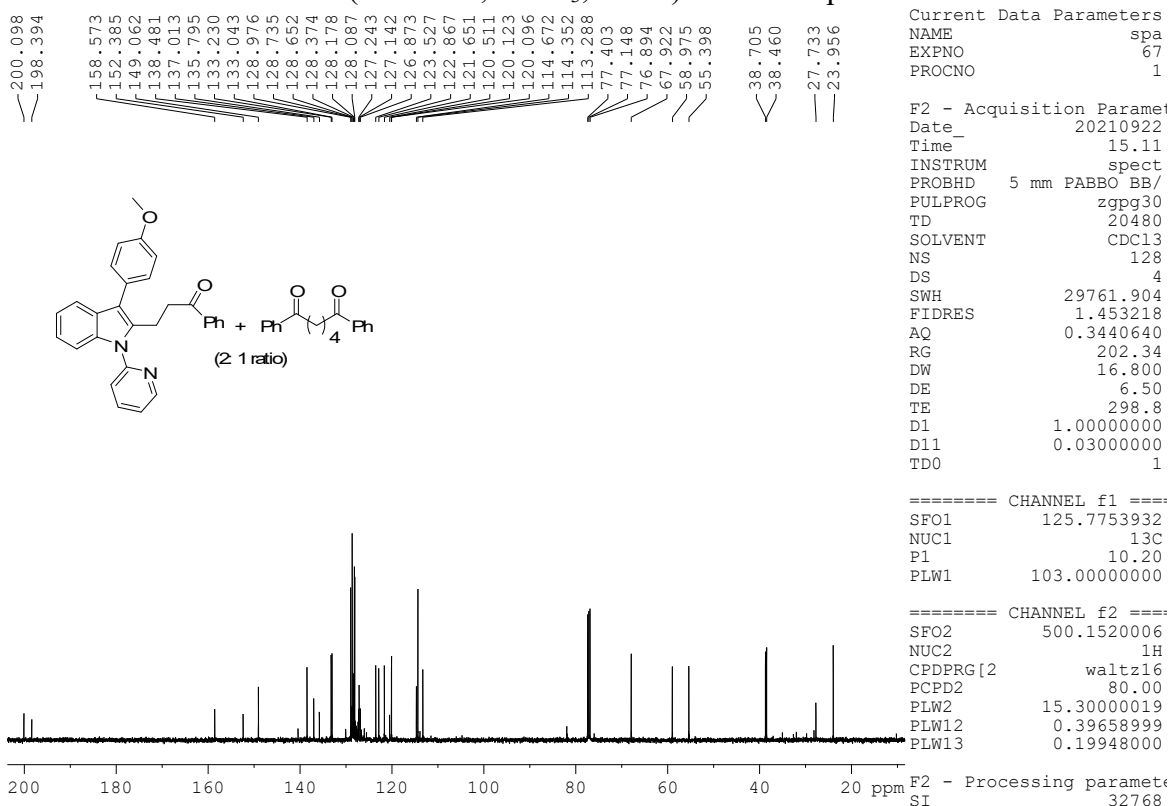

<sup>13</sup>C{<sup>1</sup>H} NMR (100 MHz, CDCl<sub>3</sub>, 24 °C) of the compound 3n

**1-Phenyl-3-(1-(pyridin-2-yl)-3-(4-(trifluoromethoxy)phenyl)-1H-indol-2-yl)propan-1-one:**  
**3o**

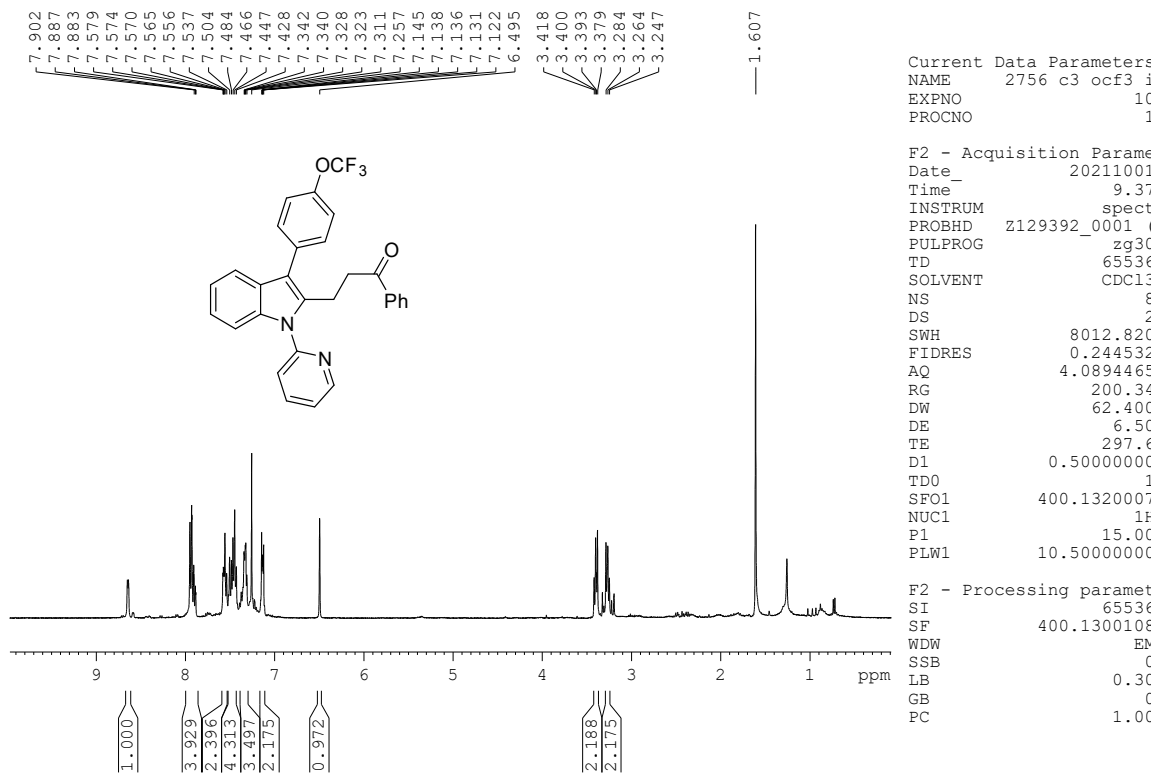

<sup>1</sup>H NMR (400 MHz, CDCl<sub>3</sub>, 24 °C) of the compound **3o**

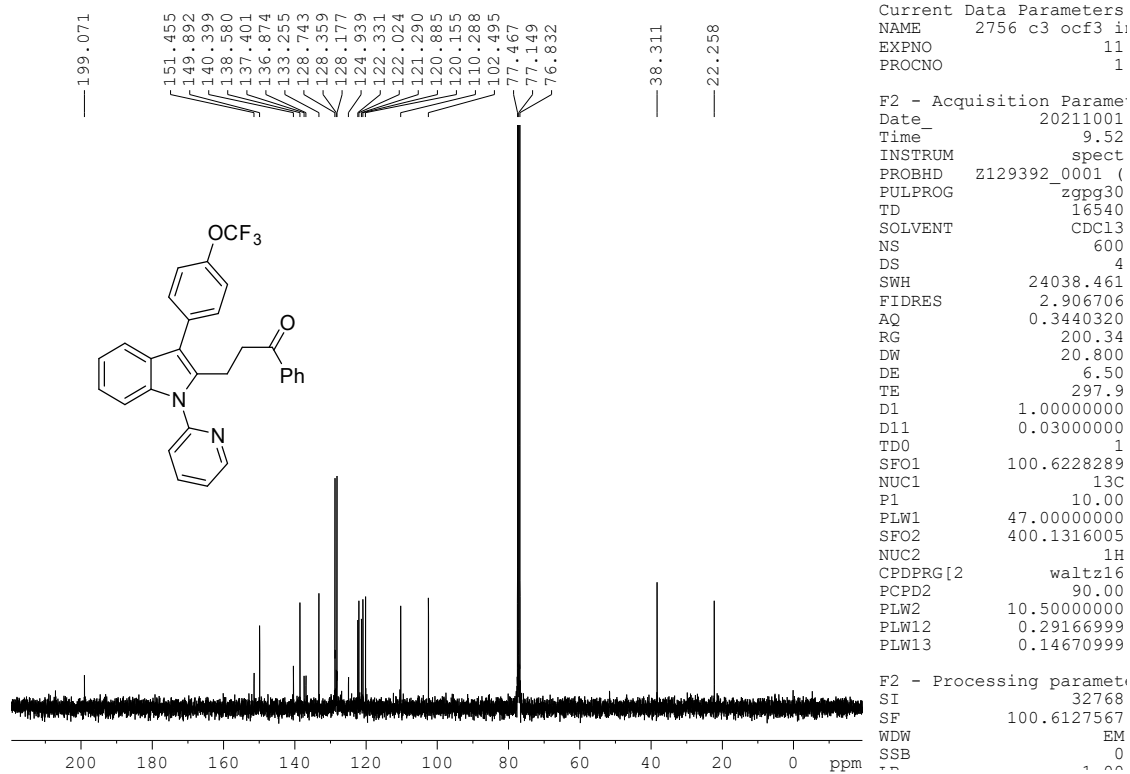

<sup>13</sup>C{<sup>1</sup>H} NMR (100 MHz, CDCl<sub>3</sub>, 24 °C) of the compound **3o**

**3-(1-(4-Methylpyridin-2-yl)-1H-indol-2-yl)-1-phenylpropan-1-one: 3p**

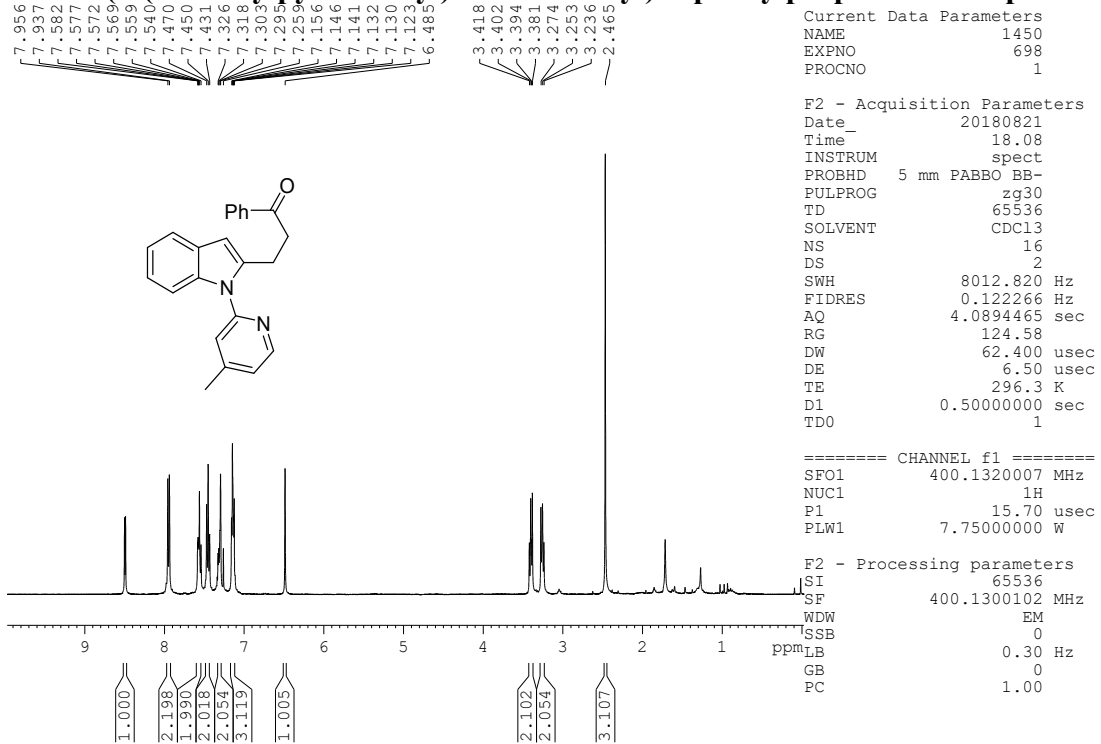

<sup>1</sup>H NMR (400 MHz, CDCl<sub>3</sub>, 24 °C) of the compound **3p**

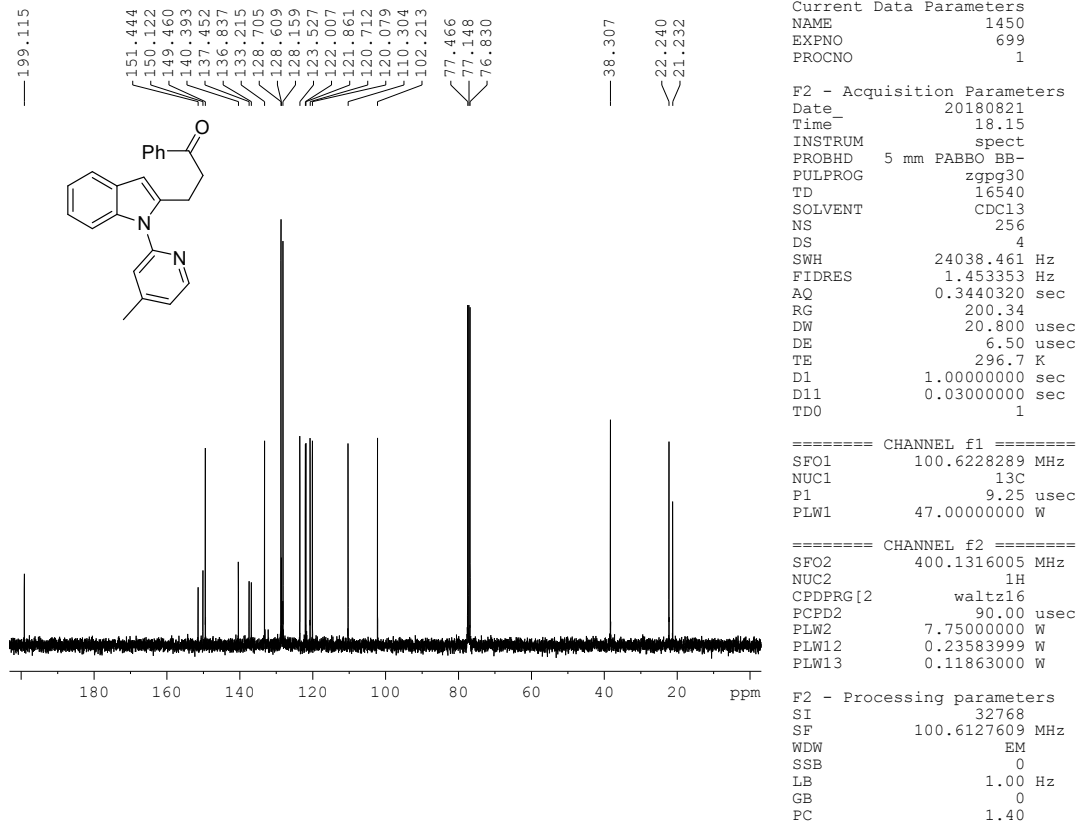

<sup>13</sup>C{<sup>1</sup>H} NMR (100 MHz, CDCl<sub>3</sub>, 24 °C) of the compound **3p**



**1-Phenyl-3-(1-(pyrimidin-2-yl)-1H-indol-2-yl)propan-1-one: 3q**

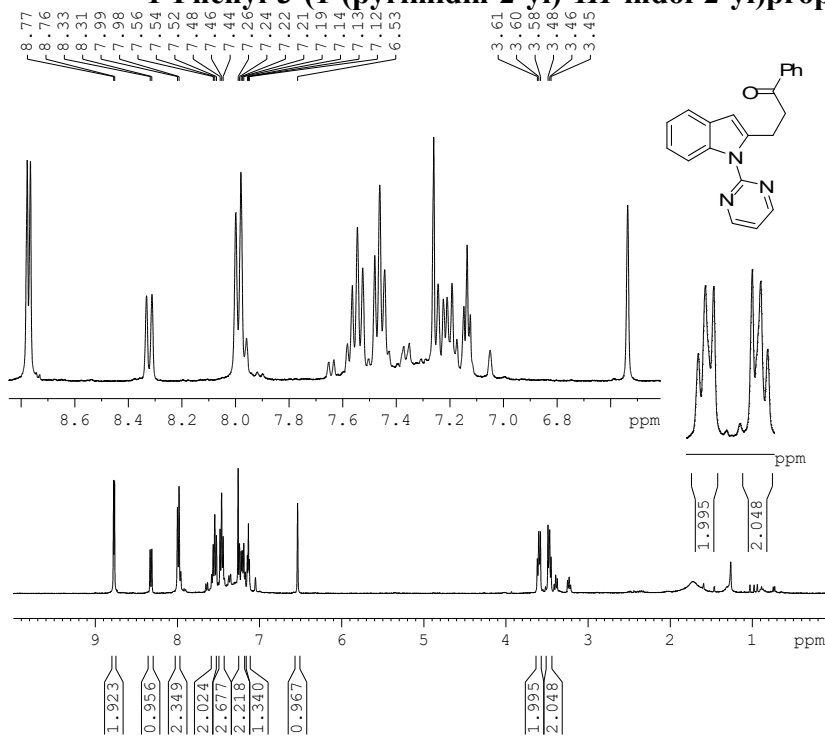

Current Data Parameters  
 NAME pj5  
 EXPNO 371  
 PROCNO 1

F2 - Acquisition Parameters  
 Date\_ 20220815  
 Time\_ 9.49 h  
 INSTRUM spect  
 PROBHD z129392\_0001 (  
 PULPROG zg30  
 TD 65536  
 SOLVENT CDCl3  
 NS 4  
 DS 2  
 SWH 8012.820 Hz  
 FIDRES 0.244532 Hz  
 AQ 4.0894465 sec  
 RG 200.34  
 DW 62.400 usec  
 DE 6.50 usec  
 TE 299.8 K  
 D1 0.50000000 sec  
 TD0 1  
 SFO1 400.1320007 MHz  
 NUC1 1H  
 P1 15.00 usec  
 PLW1 10.50000000 W

F2 - Processing parameters  
 SI 65536  
 SF 400.1300094 MHz  
 WDW EM  
 SSB 0  
 LB 0.30 Hz  
 GB 0  
 PC 1.00

**<sup>1</sup>H NMR (400 MHz, CDCl<sub>3</sub>, 24 °C) of the compound 3q**

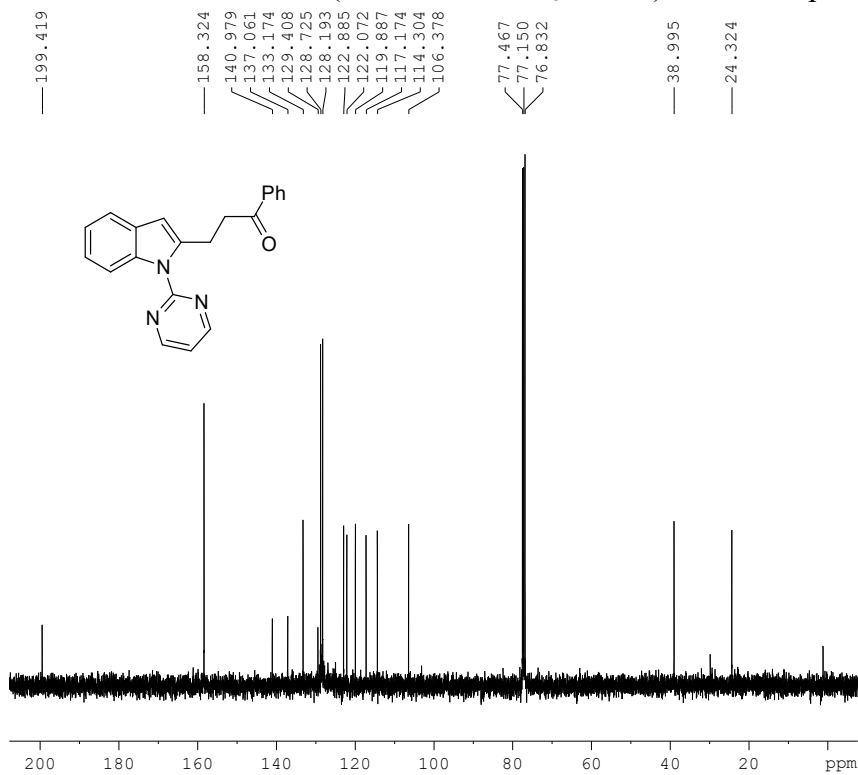

Current Data Parameters  
 NAME 2688 I PYM PAREN  
 EXPNO 31  
 PROCNO 1

F2 - Acquisition Parameters  
 Date\_ 20210704  
 Time\_ 15.10 h  
 INSTRUM spect  
 PROBHD z129392\_0001 (  
 PULPROG zgpg30  
 TD 16540  
 SOLVENT CDCl3  
 NS 256  
 DS 4  
 SWH 24038.461 H  
 FIDRES 2.906706 H  
 AQ 0.34440320 s  
 RG 200.34  
 DW 20.800 u  
 DE 6.50 u  
 TE 301.0 K  
 D1 1.00000000 s  
 D11 0.03000000 s  
 TD0 1  
 SFO1 100.6228289 M  
 NUC1 13C  
 P1 10.00 u  
 PLW1 47.00000000 W  
 SFO2 400.1316005 M  
 NUC2 1H  
 CPDPRG[2] waltz16  
 PCPD2 90.00 u  
 PLW2 10.50000000 W  
 PLW12 0.29166999 W  
 PLW13 0.14670999 W

F2 - Processing parameter  
 SI 32768  
 SF 100.6127579 M  
 WDW EM  
 SSB 0

**<sup>13</sup>C{<sup>1</sup>H} NMR (100 MHz, CDCl<sub>3</sub>, 24 °C) of the compound 3q**

**3-(1-(Pyridin-2-yl)-1H-indol-2-yl)-1-(p-tolyl)propan-1-one: 3r**

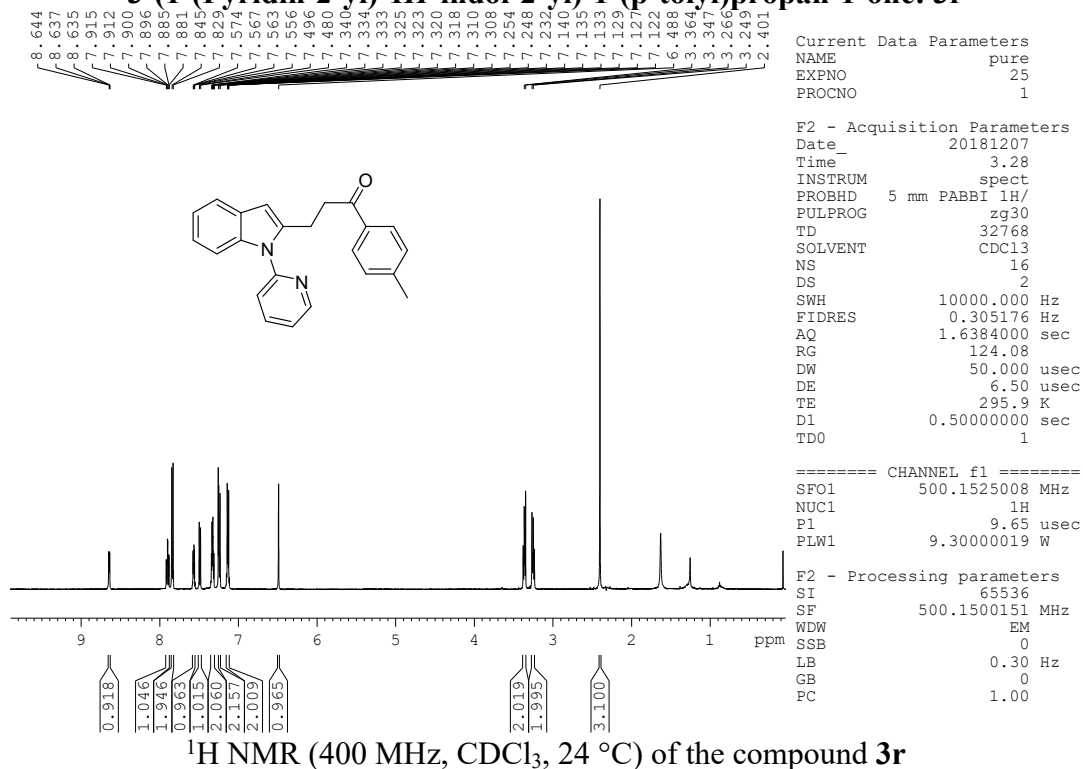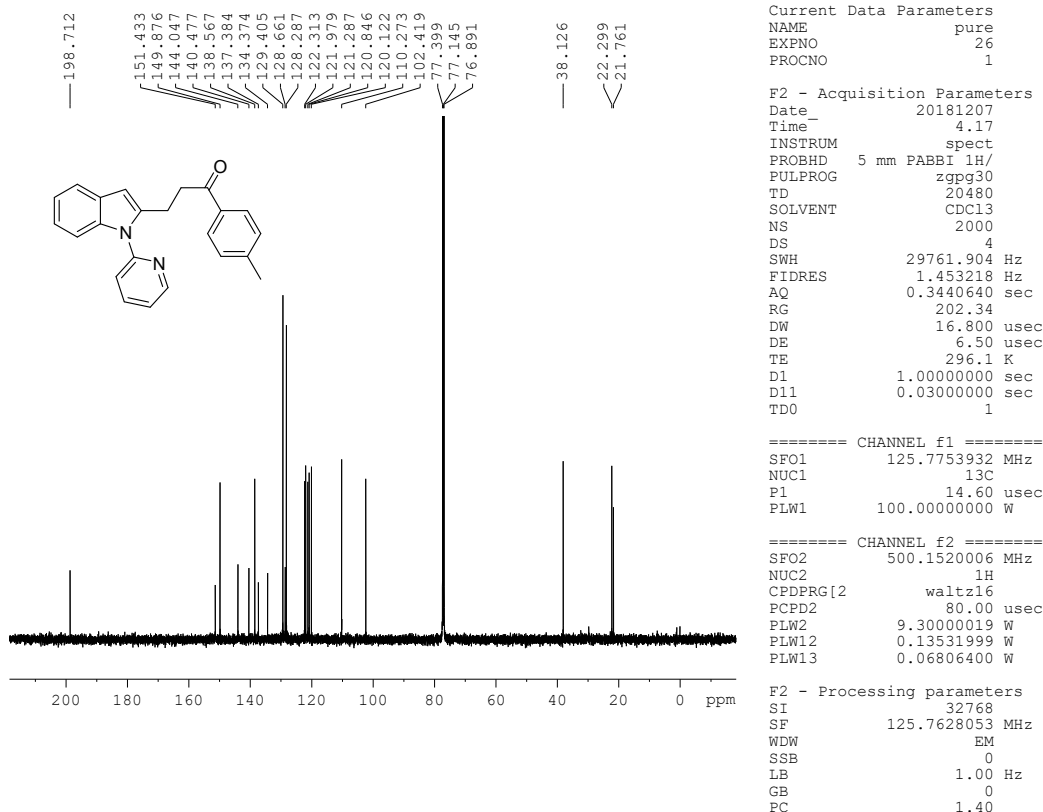

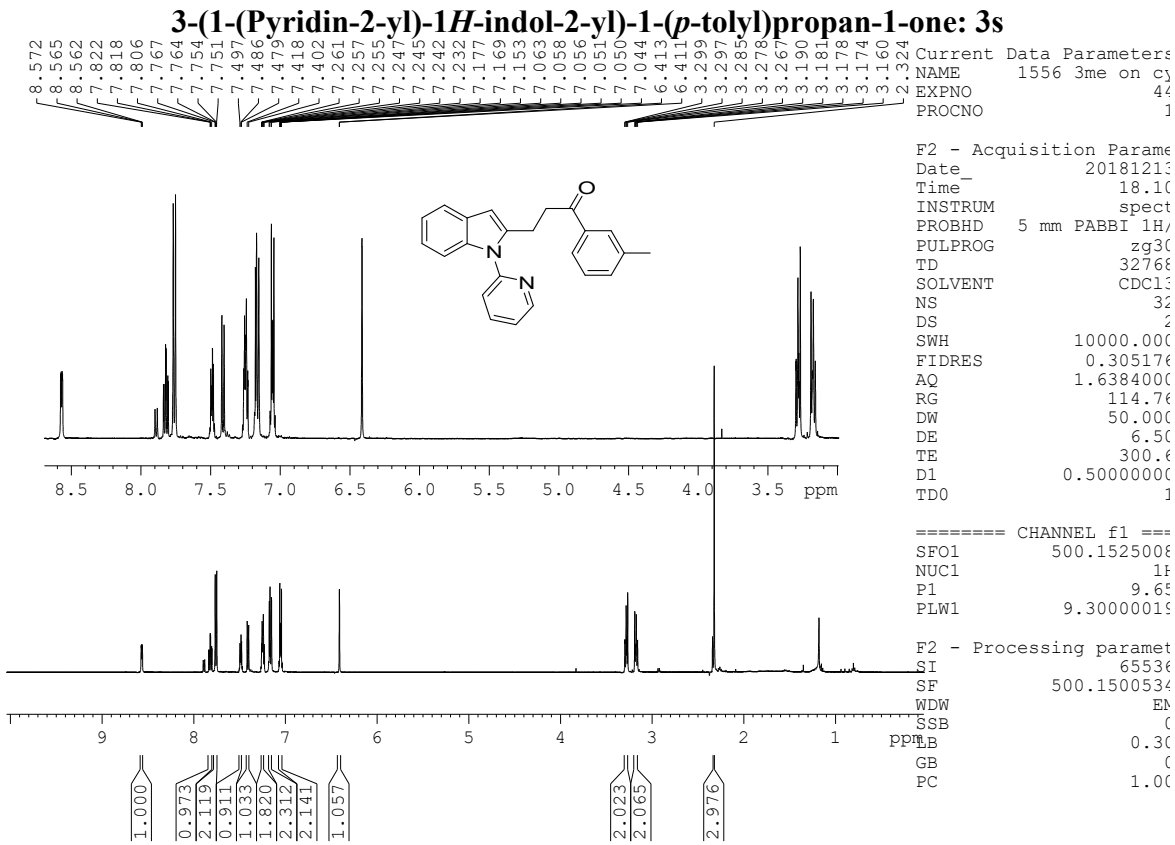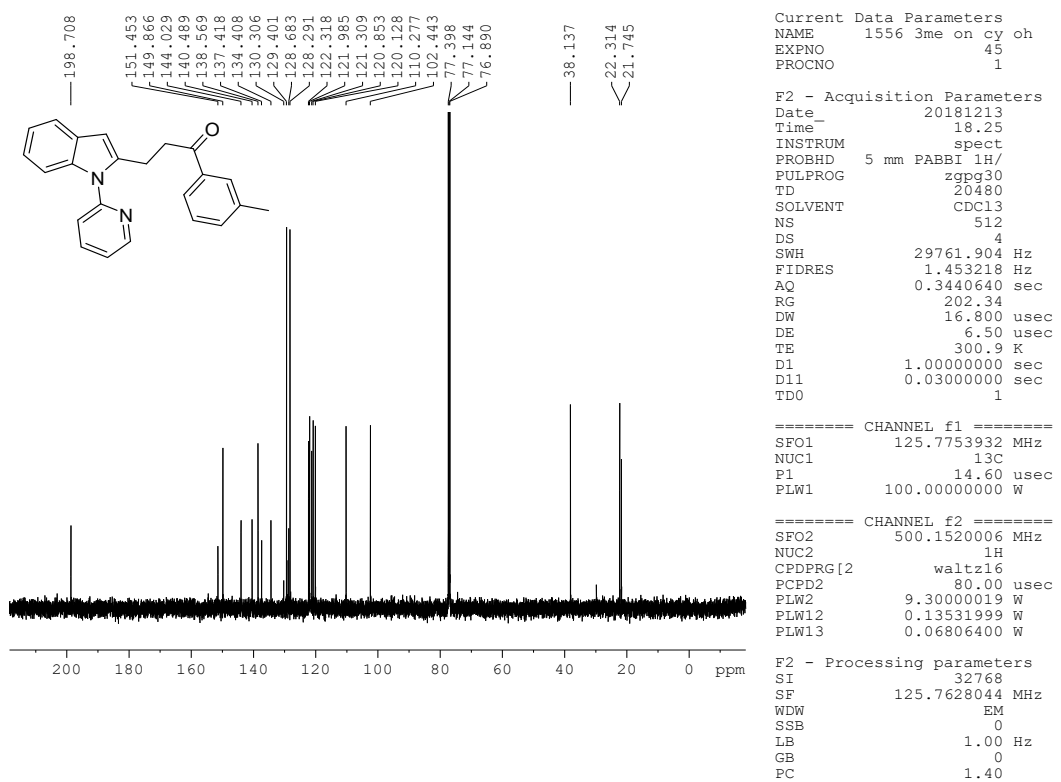

```

Current Data Parameters
NAME      1556 3me on cy
EXPNO    44
PROCNO   1

F2 - Acquisition Parameters
Date_    20181213
Time     18.10
INSTRUM  spect
PROBHD   5 mm PABBI 1H/
PULPROG  zg30
TD       32768
SOLVENT  CDCl3
NS       32
DS       2
SWH      10000.000
FIDRES   0.305176
AQ       1.6384000
RG       114.76
DW       50.000
DE       6.50
TE       300.6
D1       0.50000000
TD0      1

===== CHANNEL f1 =====
SFO1     500.1525008
NUC1     1H
P1       9.69
PLW1     9.30000019

F2 - Processing parameters
SI       65536
SF       500.1500534
WDW      EM
SSB      0
GB       0
PC       1.00
  
```

```

Current Data Parameters
NAME      1556 3me on cy oh
EXPNO    45
PROCNO   1

F2 - Acquisition Parameters
Date_    20181213
Time     18.25
INSTRUM  spect
PROBHD   5 mm PABBI 1H/
PULPROG  zgpg30
TD       20480
SOLVENT  CDCl3
NS       512
DS       4
SWH      29761.904 Hz
FIDRES   1.453218 Hz
AQ       0.3440640 sec
RG       202.34
DW       16.800 usec
DE       6.50 usec
TE       300.9 K
D1       1.00000000 sec
D11      0.03000000 sec
TD0      1

===== CHANNEL f1 =====
SFO1     125.7753932 MHz
NUC1     13C
P1       14.60 usec
PLW1     100.00000000 W

===== CHANNEL f2 =====
SFO2     500.1520006 MHz
NUC2     1H
CPDPRG[2] waltz16
PCPD2    80.00 usec
PLW2     9.30000019 W
PLW12    0.13531999 W
PLW13    0.06806400 W

F2 - Processing parameters
SI       32768
SF       125.7628044 MHz
WDW      EM
SSB      0
LB       1.00 Hz
GB       0
PC       1.40
  
```

**3-(1-(Pyridin-2-yl)-1H-indol-2-yl)-1-(o-tolyl)propan-1-one: 3t**

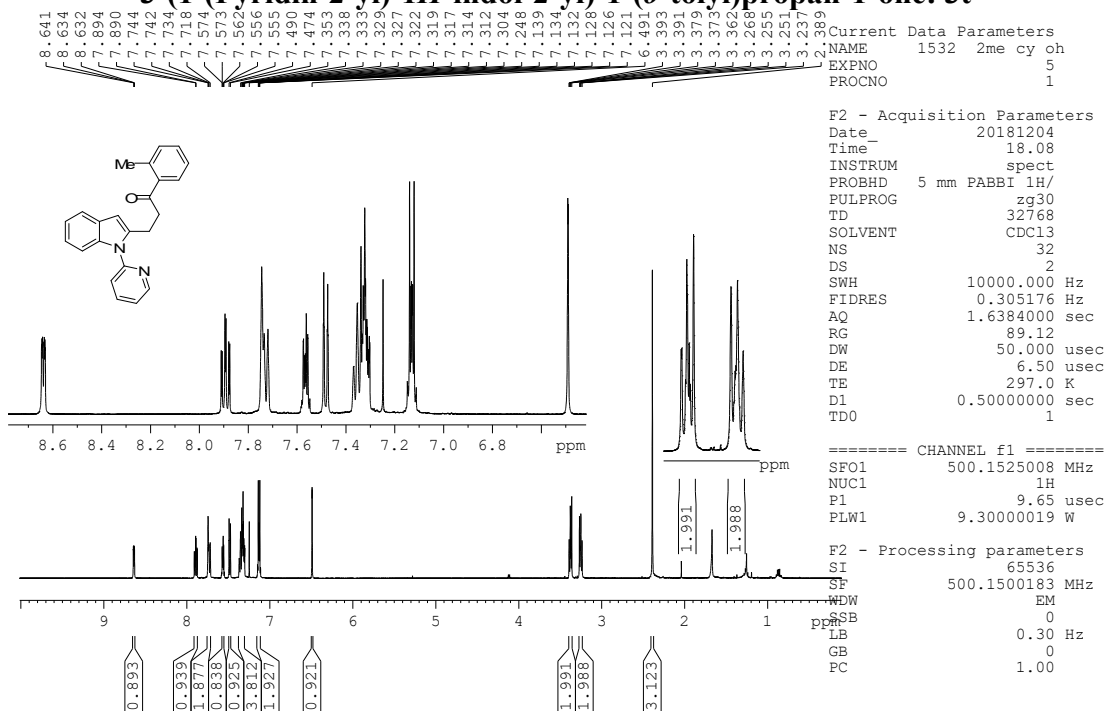

**<sup>1</sup>H NMR (400 MHz, CDCl<sub>3</sub>, 24 °C) of the compound 3t**

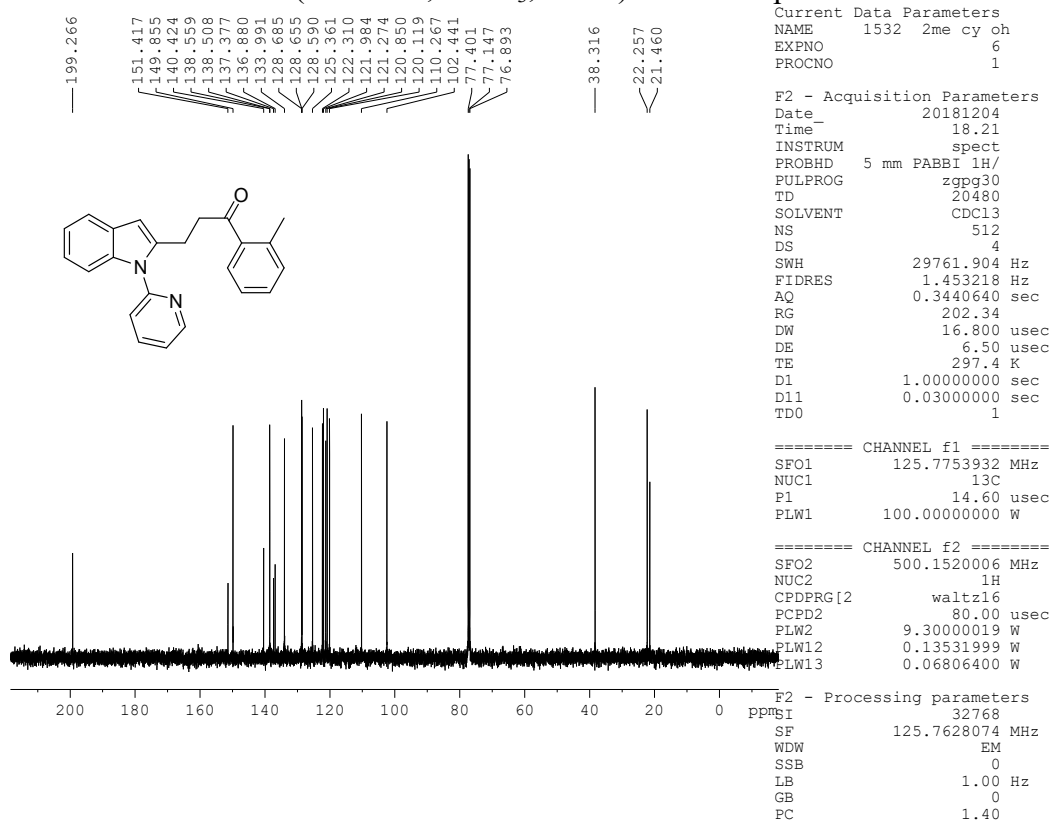

**<sup>13</sup>C{<sup>1</sup>H} NMR (100 MHz, CDCl<sub>3</sub>, 24 °C) of the compound 3t**

**1-(4-(*tert*-Butyl)phenyl)-3-(1-(pyridin-2-yl)-1*H*-indol-2-yl)propan-1-one: 3u**

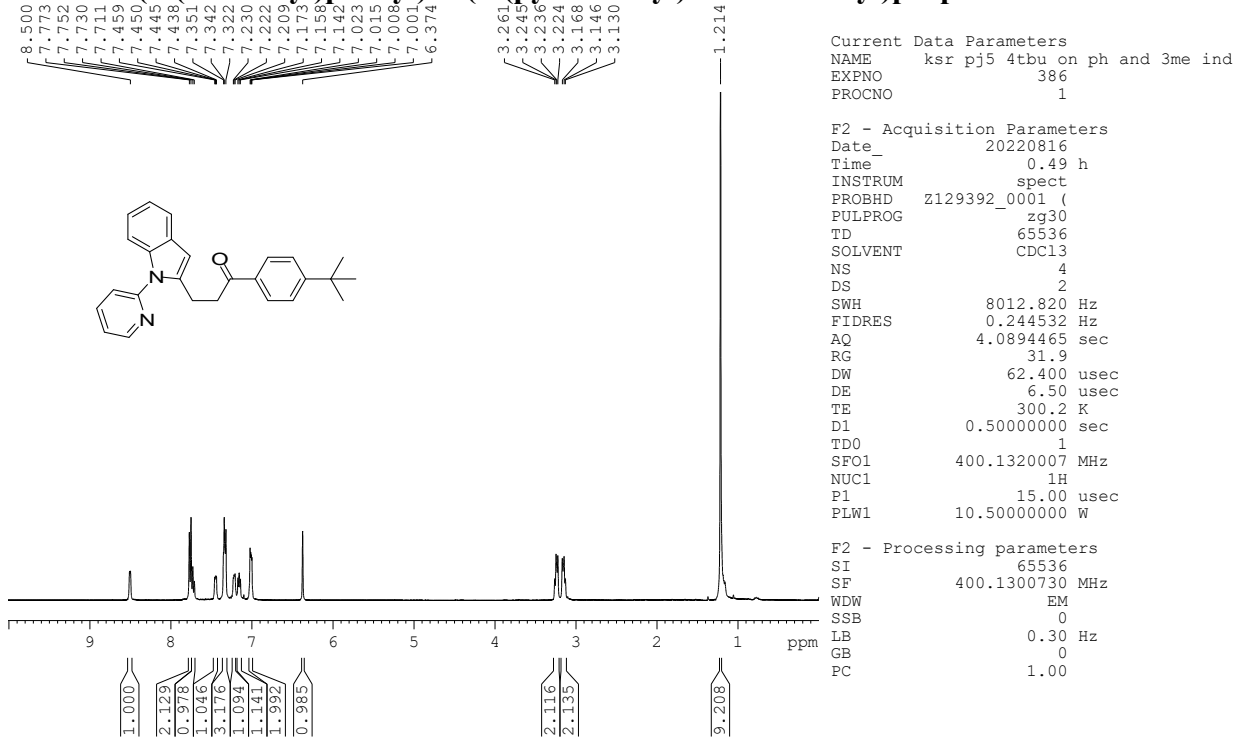

<sup>1</sup>H NMR (400 MHz, CDCl<sub>3</sub>, 24 °C) of the compound 3u

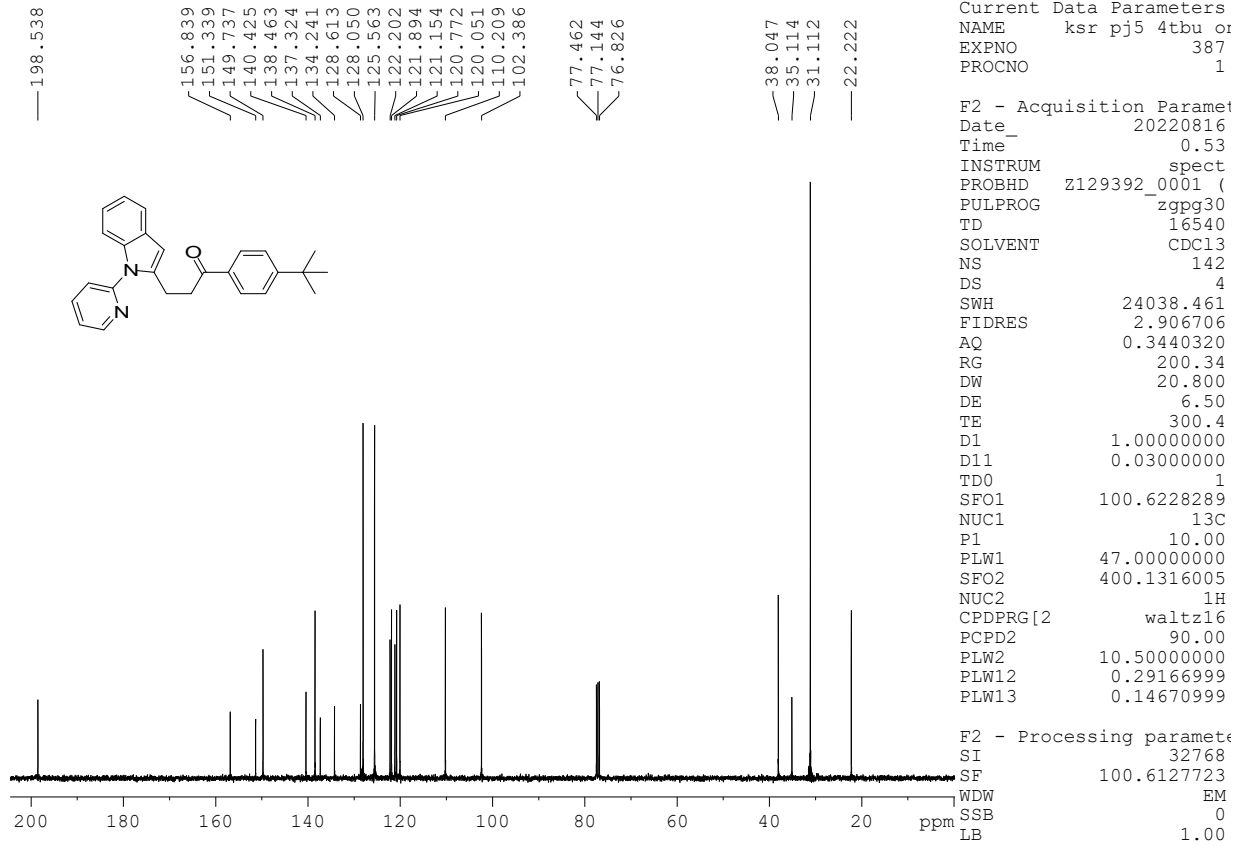

<sup>13</sup>C{<sup>1</sup>H} NMR (100 MHz, CDCl<sub>3</sub>, 24 °C) of the compound 3u

**1-([1,1'-Biphenyl]-4-yl)-3-(1-(pyridin-2-yl)-1H-indol-2-yl)propan-1-one: 3v**

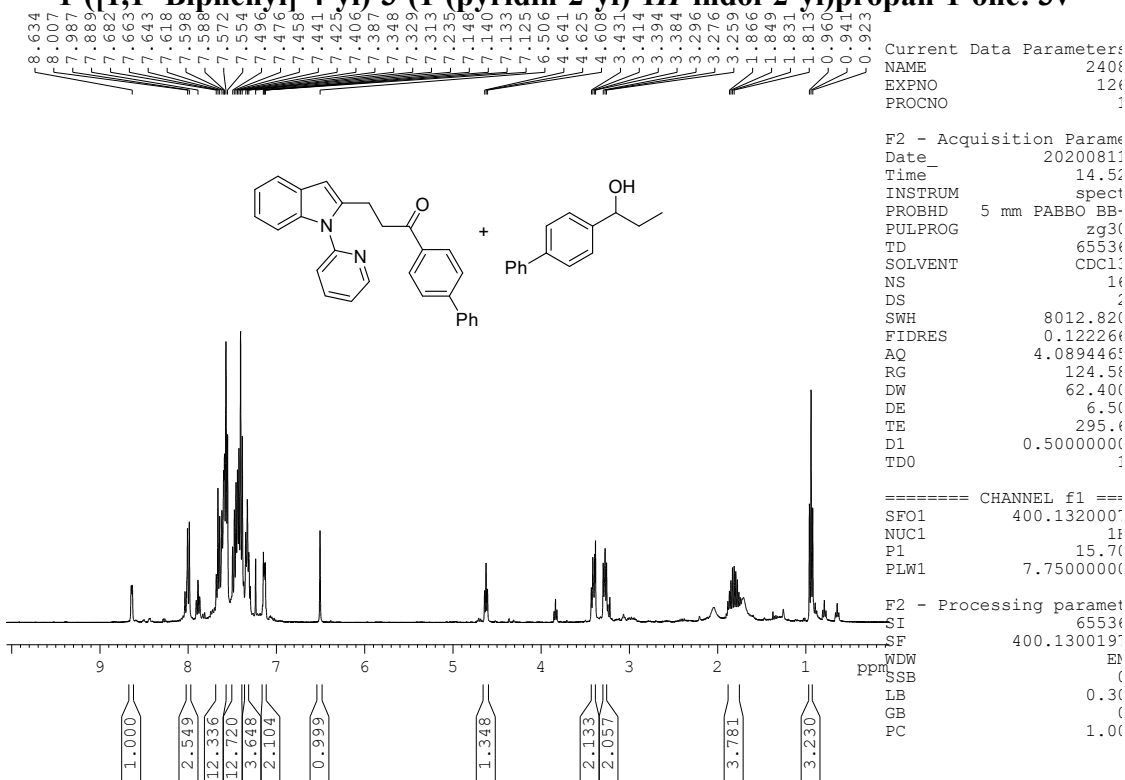

**<sup>1</sup>H NMR (400 MHz, CDCl<sub>3</sub>, 24 °C) of the compound: 3v**

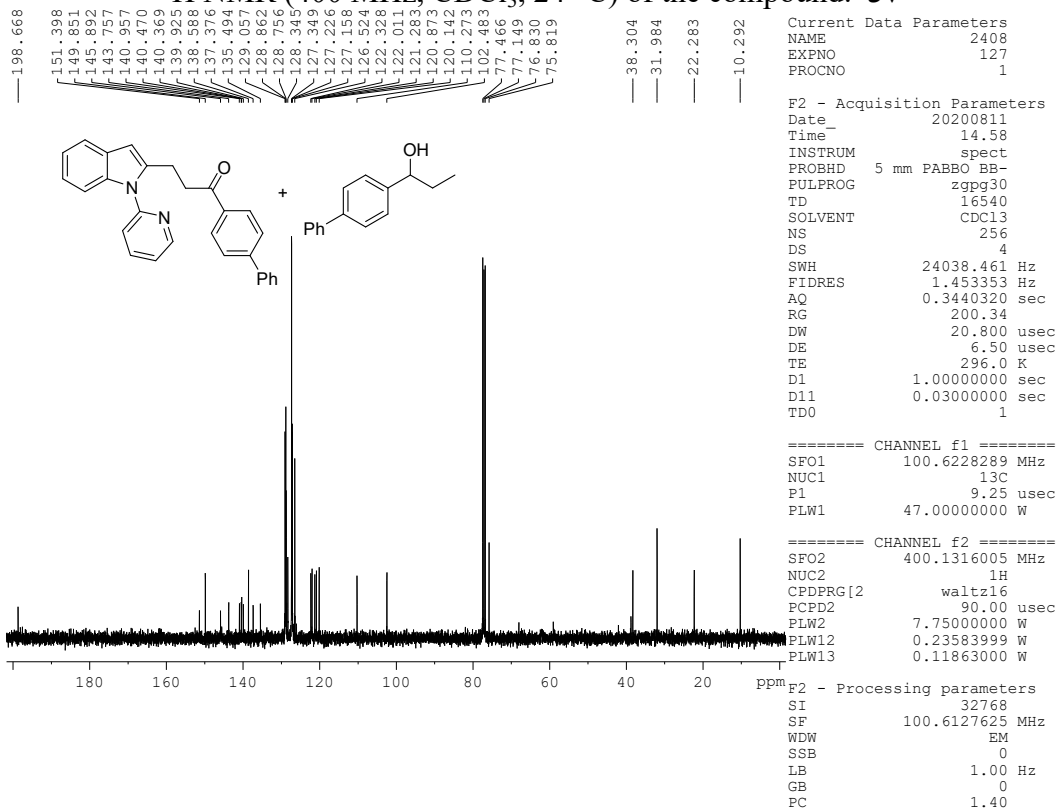

**<sup>13</sup>C{<sup>1</sup>H} NMR (100 MHz, CDCl<sub>3</sub>, 24 °C) of the compound 3v**

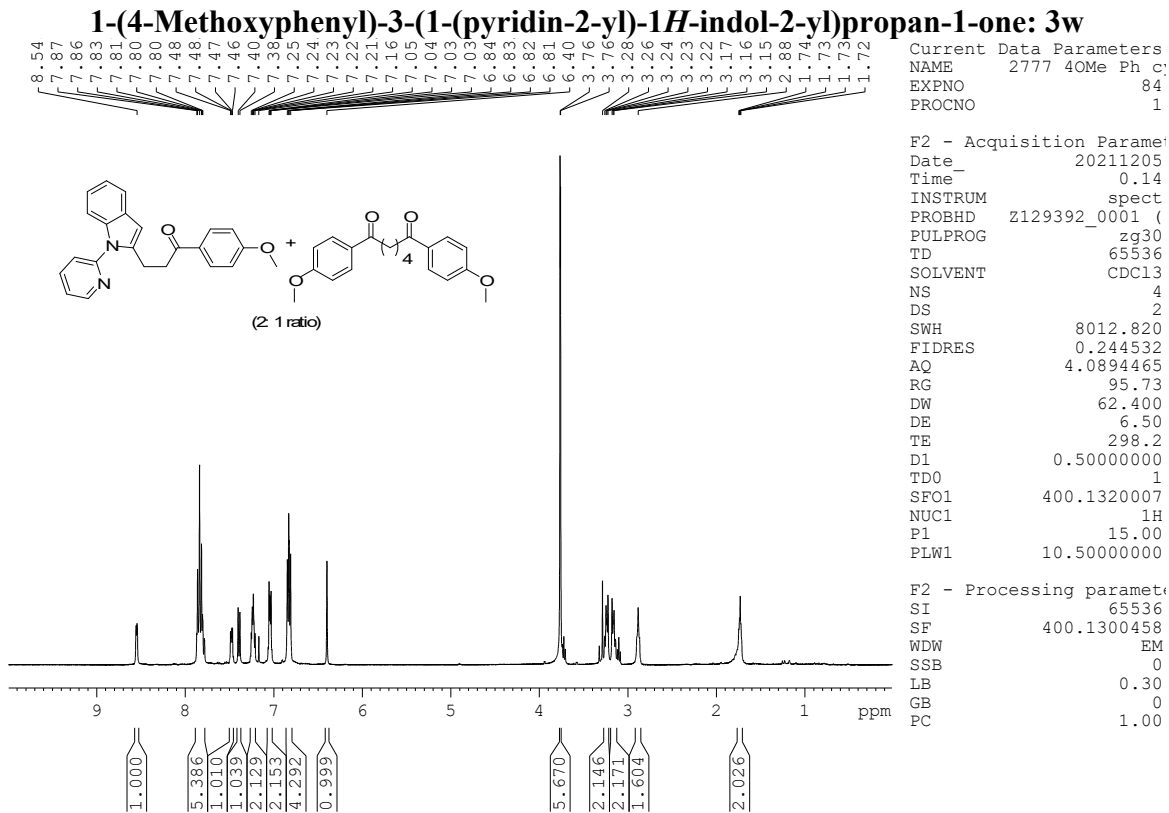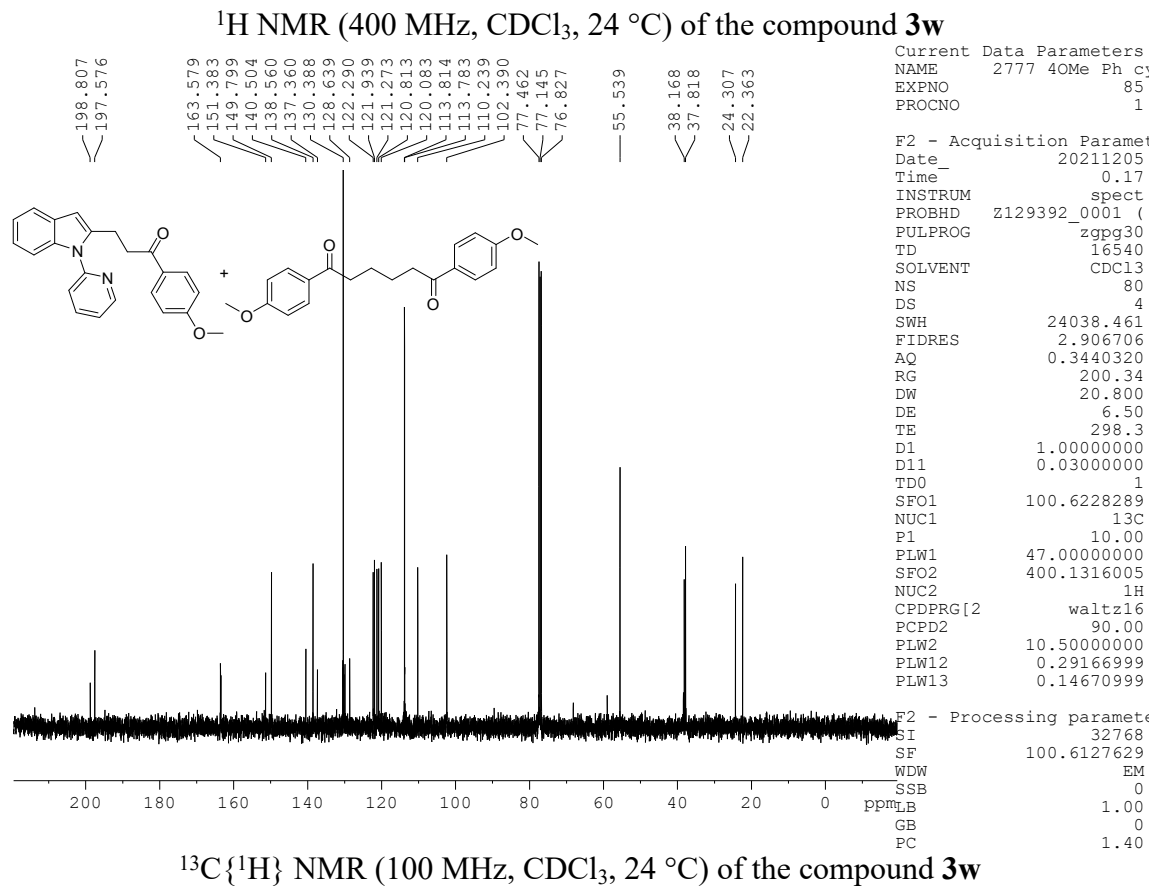

### 3-(5-Methoxy-1-(pyridin-2-yl)-1H-indol-2-yl)-1-(4-methoxyphenyl)propan-1-one:

**3x**

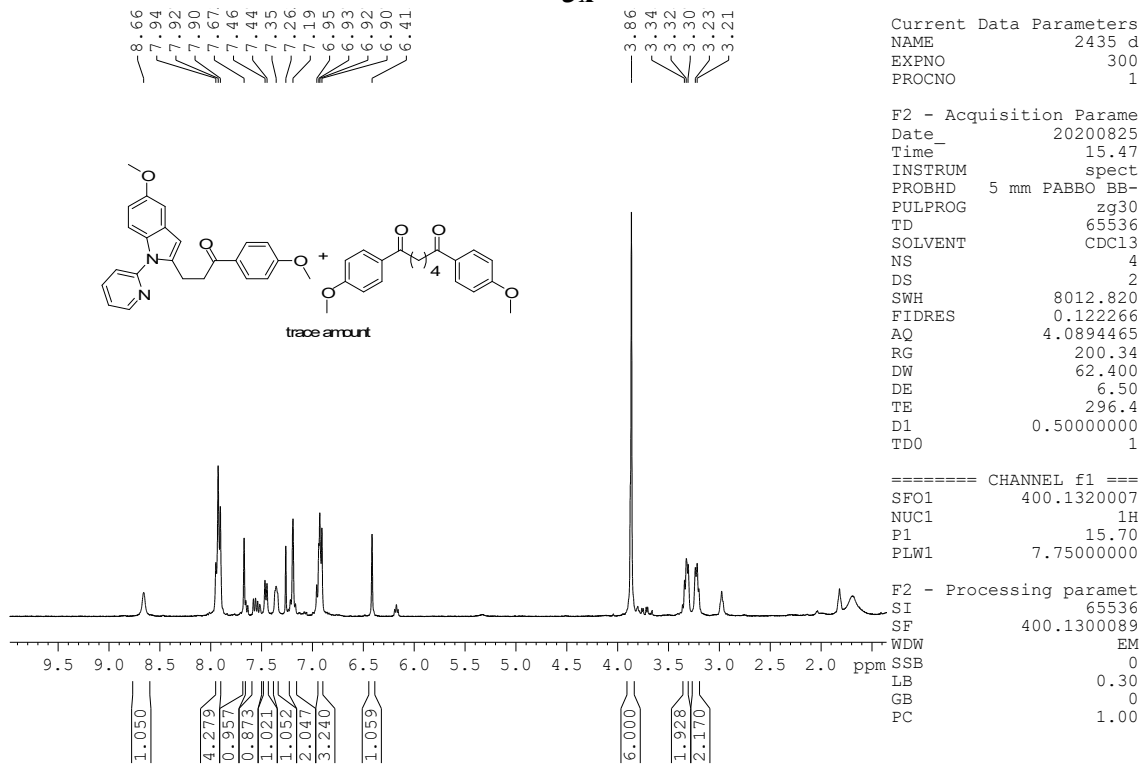

### <sup>1</sup>H NMR (400 MHz, CDCl<sub>3</sub>, 24 °C) of the compound 3x

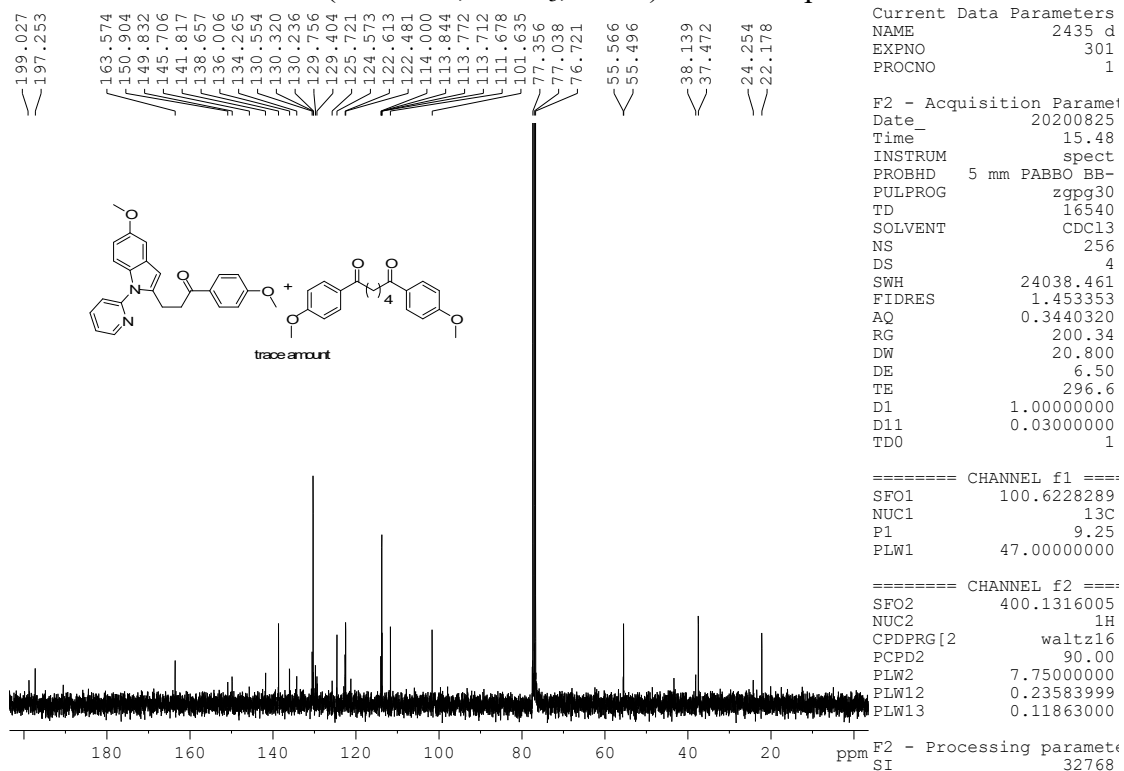

### <sup>13</sup>C{<sup>1</sup>H} NMR (100 MHz, CDCl<sub>3</sub>, 24 °C) of the compound 3x



**1-(4-Methoxyphenyl)-3-(1-(pyridin-2-yl)-1H-indol-2-yl)propan-1-one: 3y**

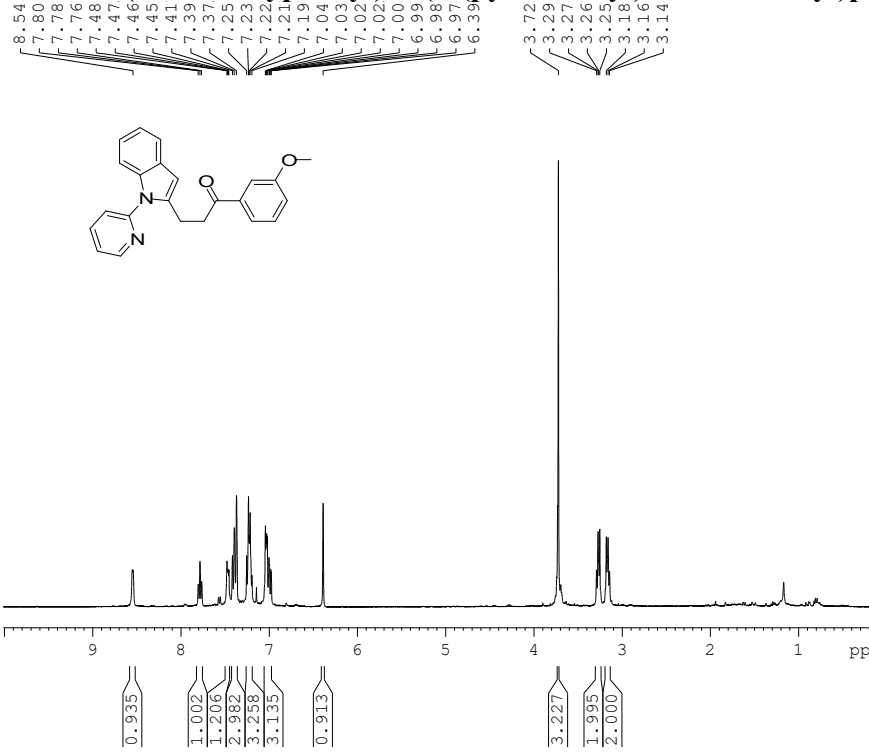

Current Data Parameters  
 NAME pj5 rev  
 EXPNO 365  
 PROCNO 1

F2 - Acquisition Parameters  
 Date\_ 20220815  
 Time\_ 5.01 h  
 INSTRUM spect  
 PROBHD Z129392\_0001 (  
 PULPROG zg30  
 TD 65536  
 SOLVENT CDC13  
 NS 4  
 DS 2  
 SWH 8012.820 Hz  
 FIDRES 0.244532 Hz  
 AQ 4.0894465 sec  
 RG 79.8  
 DW 62.400 usec  
 DE 6.50 usec  
 TE 300.3 K  
 D1 0.50000000 sec  
 TD0 1  
 SFO1 400.1320007 MHz  
 NUC1 1H  
 P1 15.00 usec  
 PLW1 10.50000000 W

F2 - Processing parameters  
 SI 65536  
 SF 400.1300549 MHz  
 WDW EM  
 SSB 0  
 LB 0.30 Hz  
 GB 0  
 PC 1.00

**<sup>1</sup>H NMR (400 MHz, CDCl<sub>3</sub>, 24 °C) of the compound 3y**

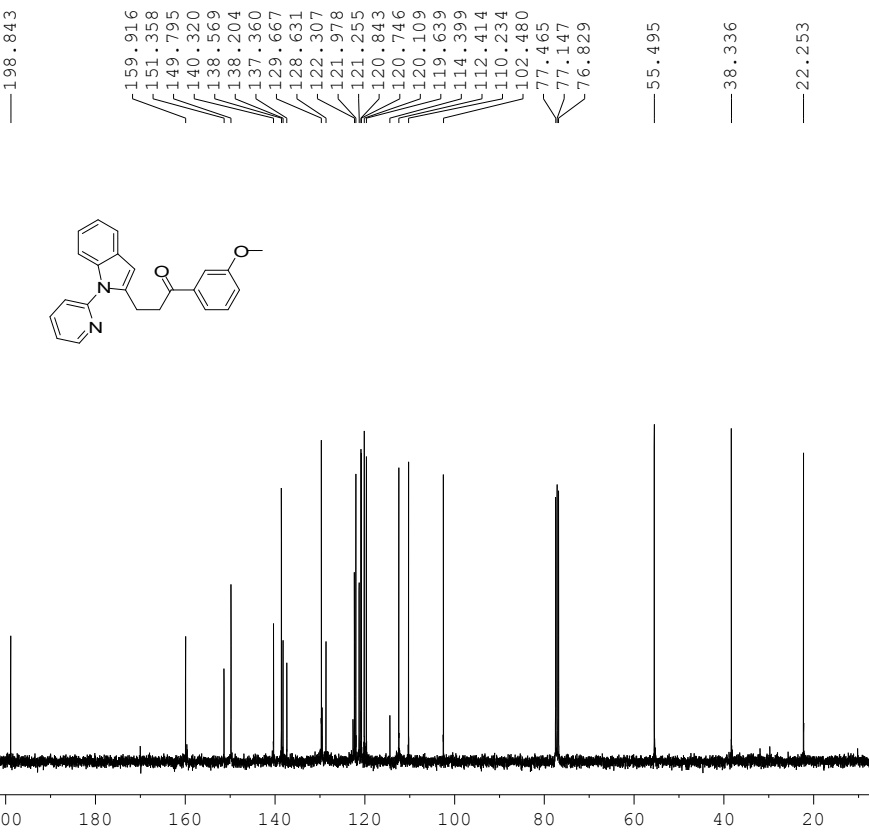

Current Data Parameters  
 NAME pj5 rev  
 EXPNO 366  
 PROCNO 1

F2 - Acquisition Parameters  
 Date\_ 20220815  
 Time\_ 5.07 h  
 INSTRUM spect  
 PROBHD Z129392\_0001 (  
 PULPROG zpgg30  
 TD 16540  
 SOLVENT CDC13  
 NS 256  
 DS 4  
 SWH 24038.461 MHz  
 FIDRES 2.906706 MHz  
 AQ 0.3440320 sec  
 RG 200.34  
 DW 20.800 usec  
 DE 6.50 usec  
 TE 300.2 K  
 D1 1.00000000 sec  
 D11 0.03000000 sec  
 TD0 1  
 SFO1 100.6228289 MHz  
 NUC1 13C  
 P1 10.00 usec  
 PLW1 47.00000000 W  
 SFO2 400.1316005 MHz  
 NUC2 1H  
 CPDPRG[2] waltz16  
 PCPD2 90.00 usec  
 PLW2 10.50000000 W  
 PLW12 0.29166999 W  
 PLW13 0.14670999 W

F2 - Processing parameters  
 SI 32768  
 SF 100.6127645 MHz  
 WDW EM  
 SSB 0  
 LB 1.00 MHz

**<sup>13</sup>C{<sup>1</sup>H} NMR (100 MHz, CDCl<sub>3</sub>, 24 °C) of the compound 3y**

**1-(4-Fluorophenyl)-3-(5-methoxy-1-(pyridin-2-yl)-1H-indol-2-yl)propan-1-one: 3z**

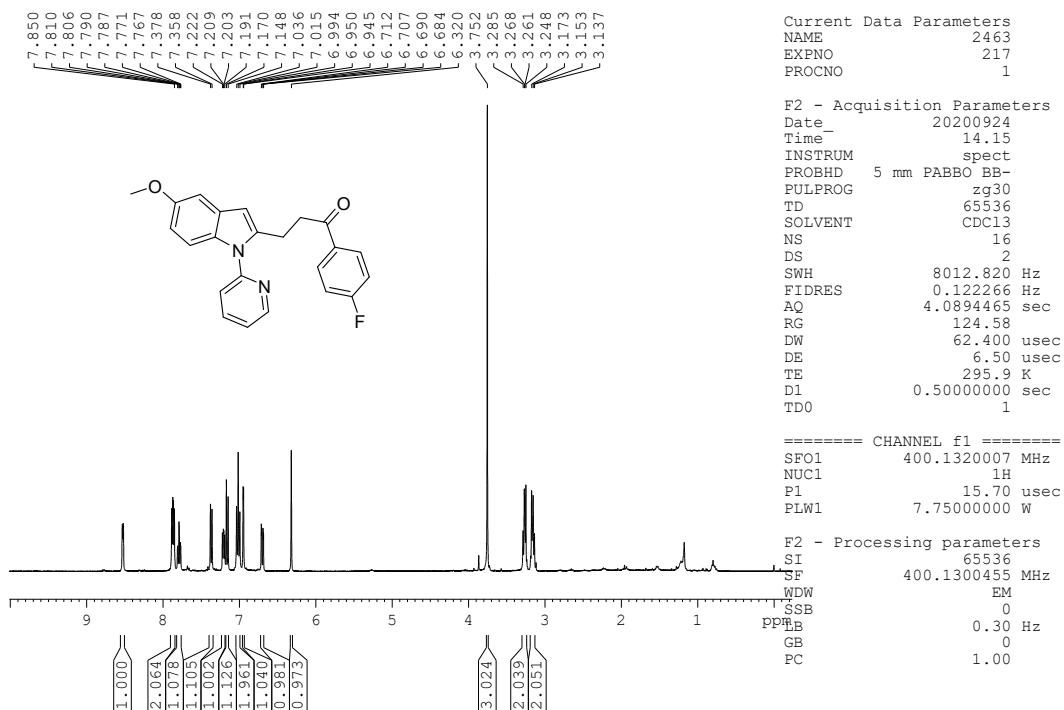

**<sup>1</sup>H NMR (400 MHz, CDCl<sub>3</sub>, 24 °C) of the compound 3z**

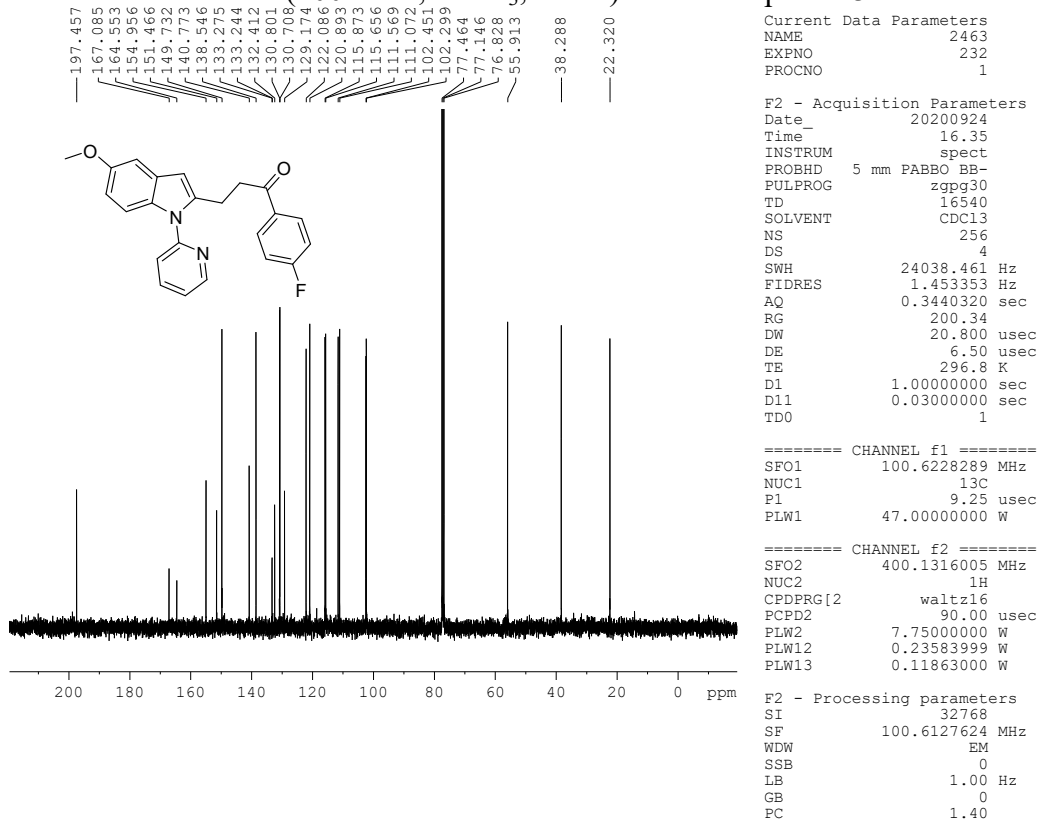

**<sup>13</sup>C{<sup>1</sup>H} NMR (100 MHz, CDCl<sub>3</sub>, 24 °C) of the compound 3z**

**1-(4-Chlorophenyl)-3-(1-(pyridin-2-yl)-1H-indol-2-yl)propan-1-one: 3aa**

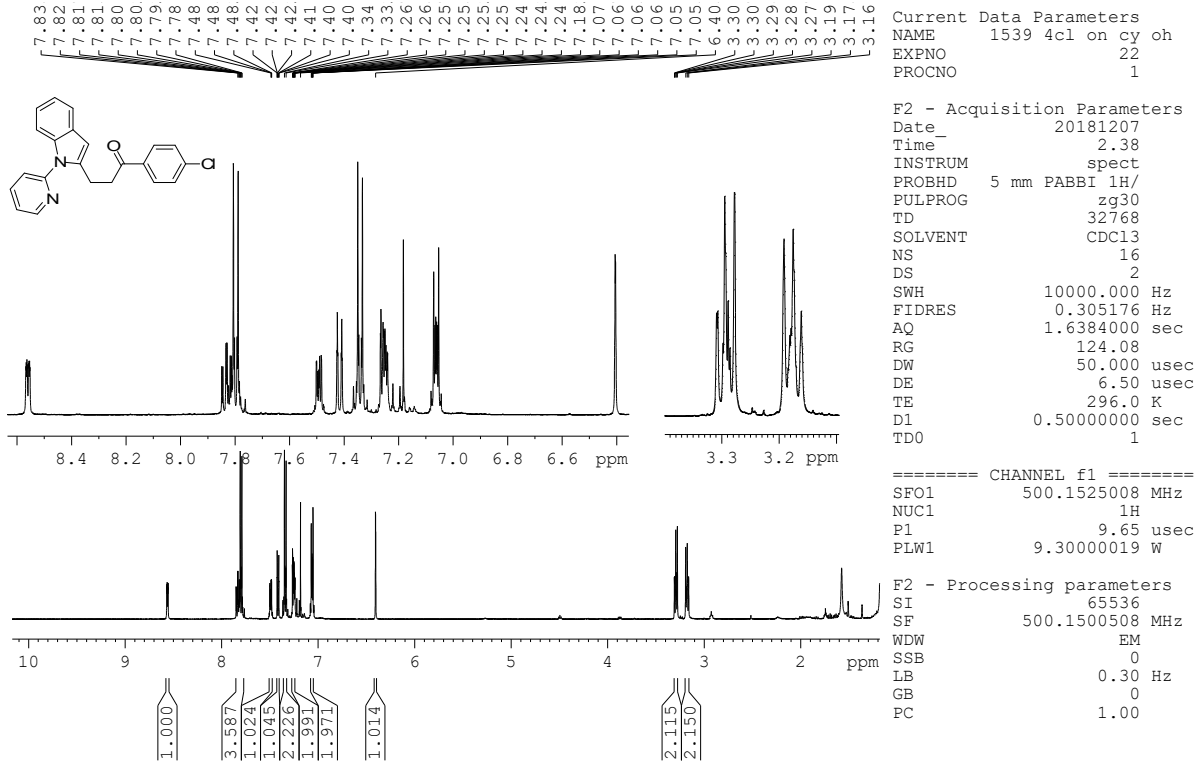

**<sup>1</sup>H NMR (400 MHz, CDCl<sub>3</sub>, 24 °C) of the compound 3aa**

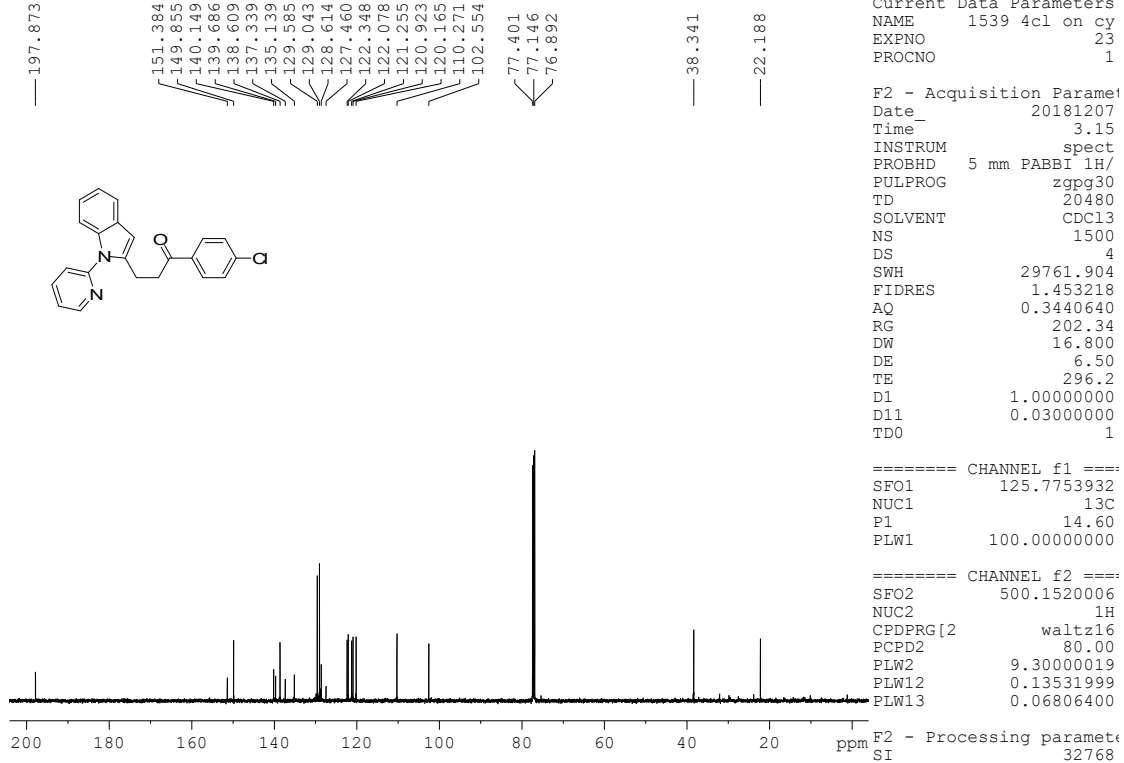

**<sup>13</sup>C{<sup>1</sup>H} NMR (100 MHz, CDCl<sub>3</sub>, 24 °C) of the compound 3aa**

# 1-(3-Chlorophenyl)-3-(5-methyl-1-(pyridin-2-yl)-1H-indol-2-yl)propan-1-one: **3ab**

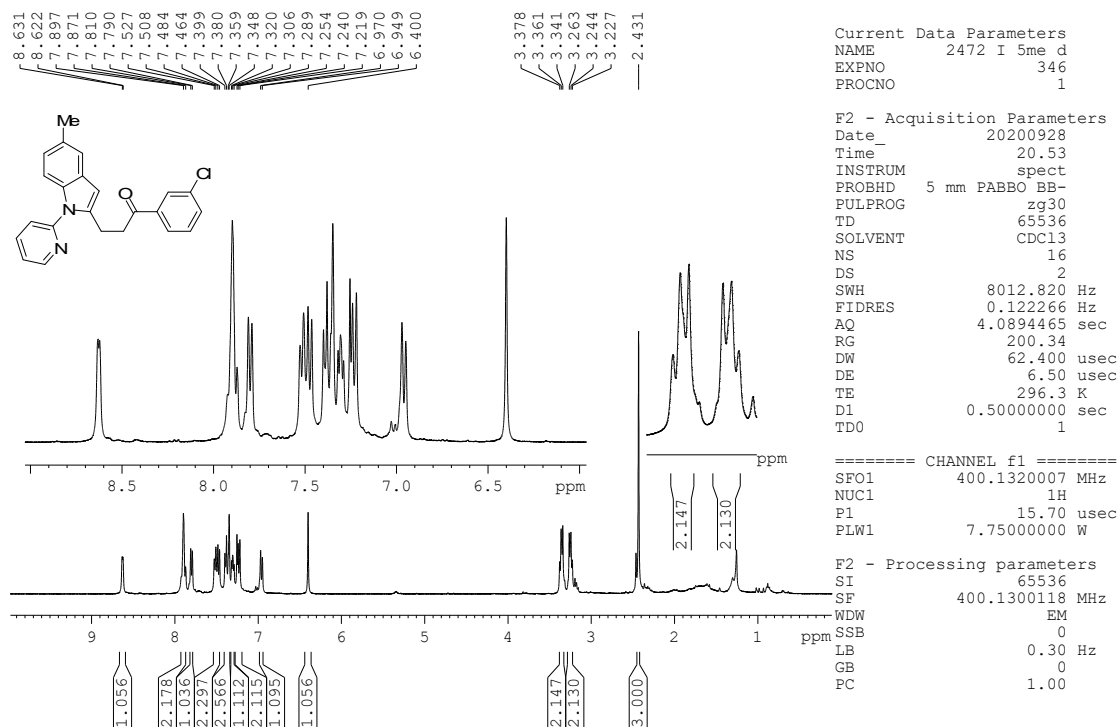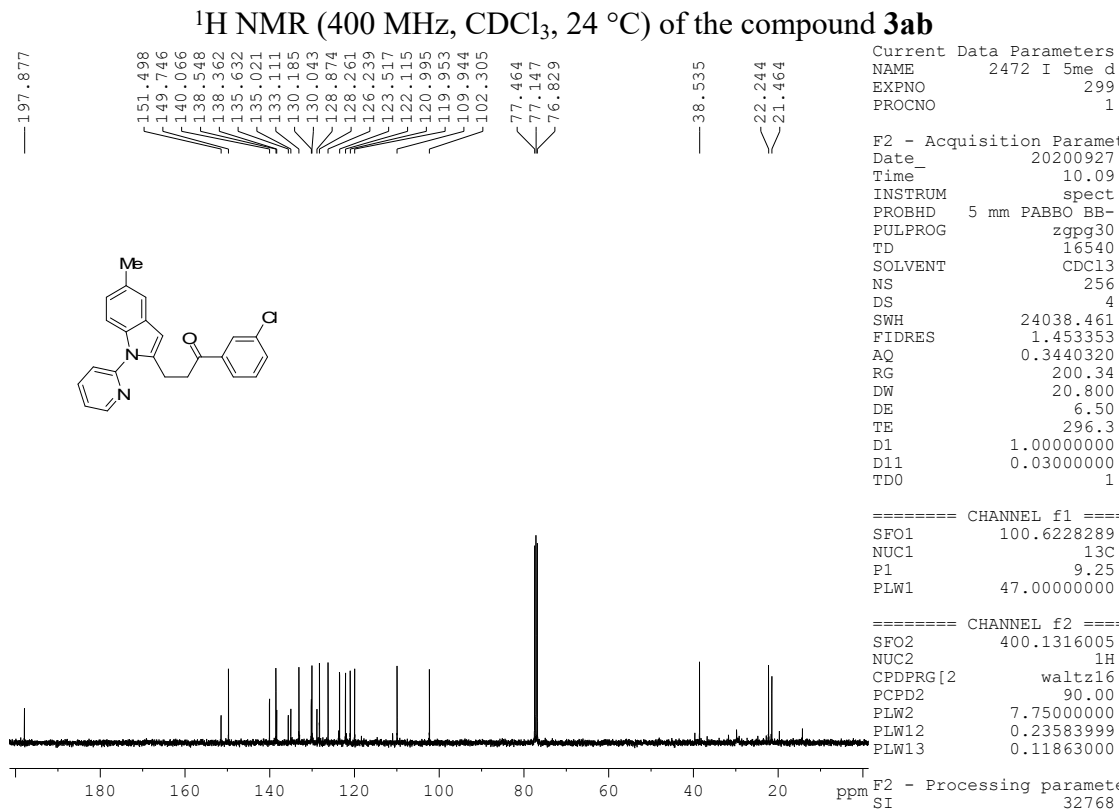

**<sup>13</sup>C{<sup>1</sup>H} NMR (100 MHz, CDCl<sub>3</sub>, 24 °C) of the compound **3ab****

### 3-(5-Bromo-1-(pyridin-2-yl)-1H-indol-2-yl)-1-(3-chlorophenyl)propan-1-one: **3ac**

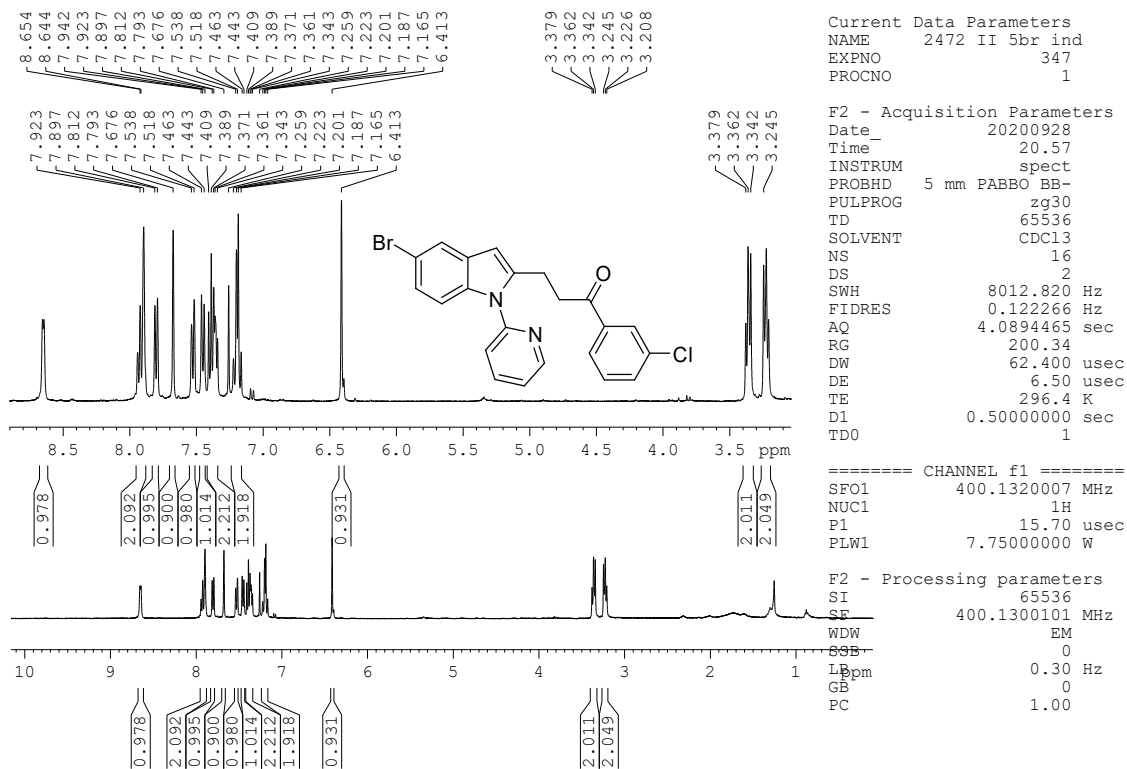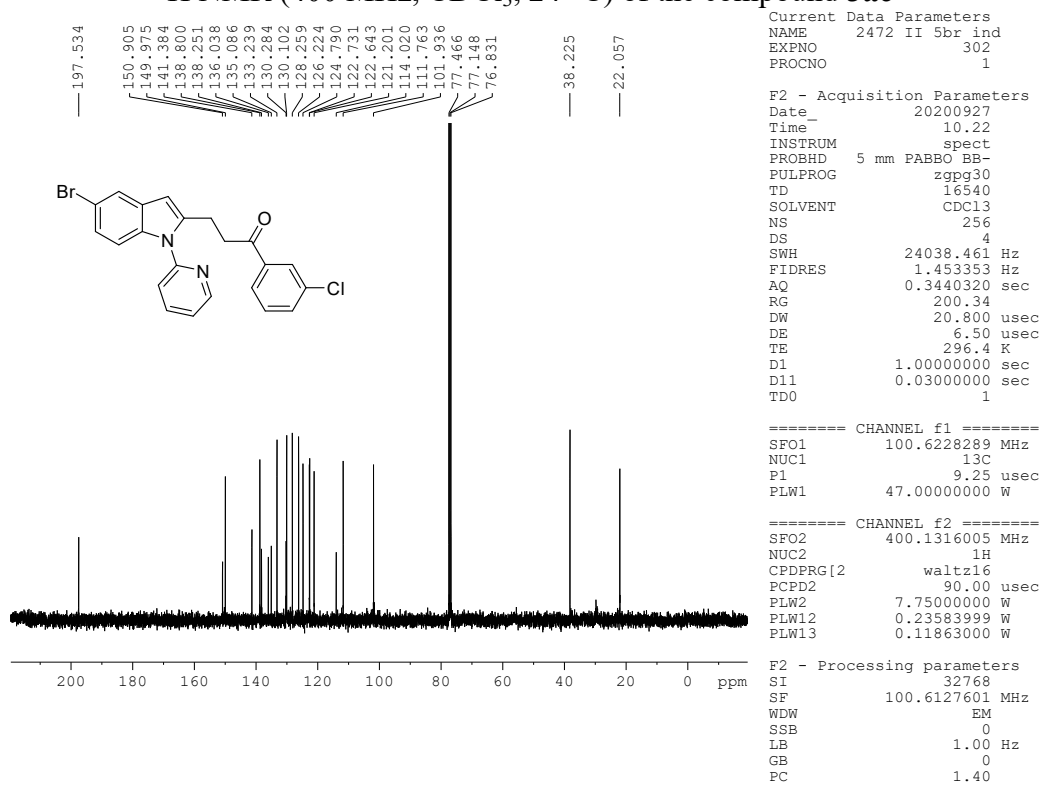

**1-Phenyl-4-(1-(pyridin-2-yl)-1H-indol-2-yl)butan-2-one: 3ad**

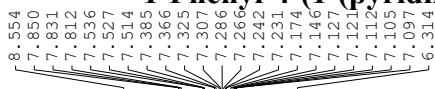

Current Data Parameters  
 NAME 2554  
 EXPNO 160  
 PROCNO 1

F2 - Acquisition Parameters  
 Date\_ 20201212  
 Time\_ 20.33  
 INSTRUM spect  
 PROBHD 5 mm PABBO BB-  
 PULPROG zg30  
 TD 65536  
 SOLVENT CDCl3  
 NS 8  
 DS 2  
 SWH 8012.820 Hz  
 FIDRES 0.122266 Hz  
 AQ 4.0894465 sec  
 RG 95.73  
 DW 62.400 usec  
 DE 6.50 usec  
 TE 296.4 K  
 D1 0.5000000 sec  
 TD0 1

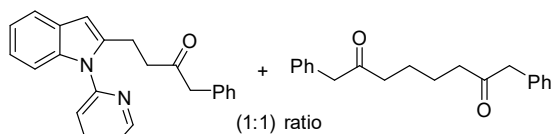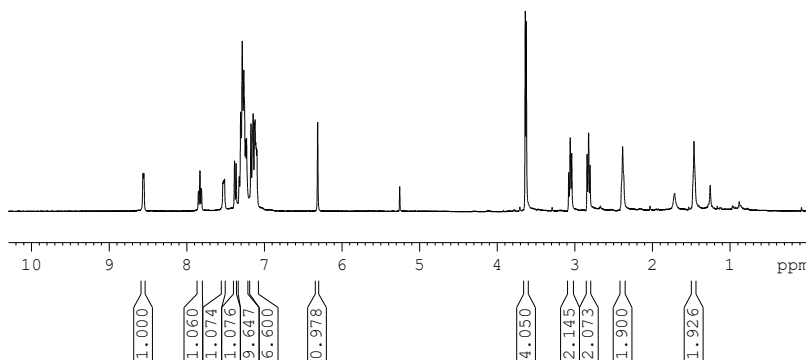

===== CHANNEL f1 =====  
 SFO1 400.1320007 MHz  
 NUC1 1H  
 P1 15.70 usec  
 PLW1 7.75000000 W

F2 - Processing parameters  
 SI 65536  
 SF 400.1300220 MHz  
 WDW EM  
 SSB 0  
 LB 0.30 Hz  
 GB 0  
 PC 1.00

**<sup>13</sup>C NMR (400 MHz, CDCl<sub>3</sub>, 24 °C) of the compound 3ad**

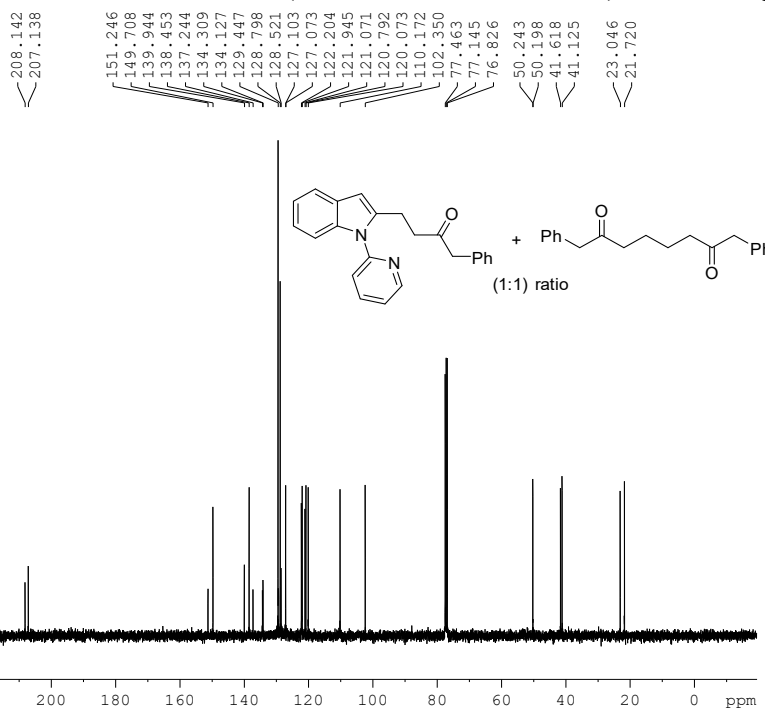

Current Data Parameters  
 NAME 2554  
 EXPNO 161  
 PROCNO 1

F2 - Acquisition Parameters  
 Date\_ 20201212  
 Time\_ 20.34  
 INSTRUM spect  
 PROBHD 5 mm PABBO BB-  
 PULPROG zgpg30  
 TD 16540  
 SOLVENT CDCl3  
 NS 227  
 DS 4  
 SWH 24038.461 Hz  
 FIDRES 1.453353 Hz  
 AQ 0.3440320 sec  
 RG 200.34  
 DW 20.800 usec  
 DE 6.50 usec  
 TE 296.5 K  
 D1 1.0000000 sec  
 D11 0.0300000 sec  
 TD0 1

===== CHANNEL f1 =====  
 SFO1 100.6228289 MHz  
 NUC1 13C  
 P1 9.25 usec  
 PLW1 47.00000000 W

===== CHANNEL f2 =====  
 SFO2 400.1316005 MHz  
 NUC2 1H  
 CPDPRG[2] waltz16  
 PCPD2 90.00 usec  
 PLW2 7.75000000 W  
 PLW12 0.23583999 W  
 PLW13 0.11863000 W

F2 - Processing parameters  
 SI 32768  
 SF 100.6127660 MHz  
 WDW EM  
 SSB 0  
 LB 1.00 Hz  
 GB 0  
 PC 1.40

**<sup>13</sup>C{<sup>1</sup>H} NMR (100 MHz, CDCl<sub>3</sub>, 24 °C) of the compound 3ad**

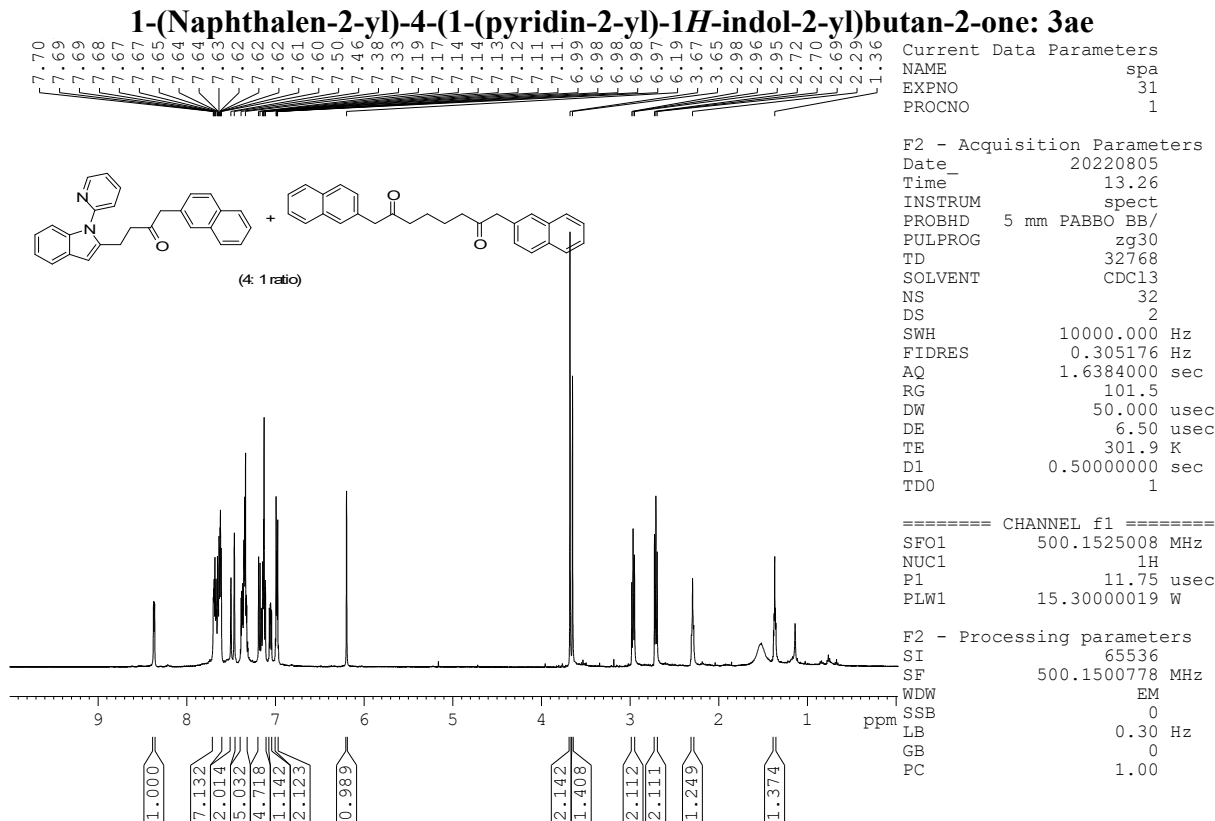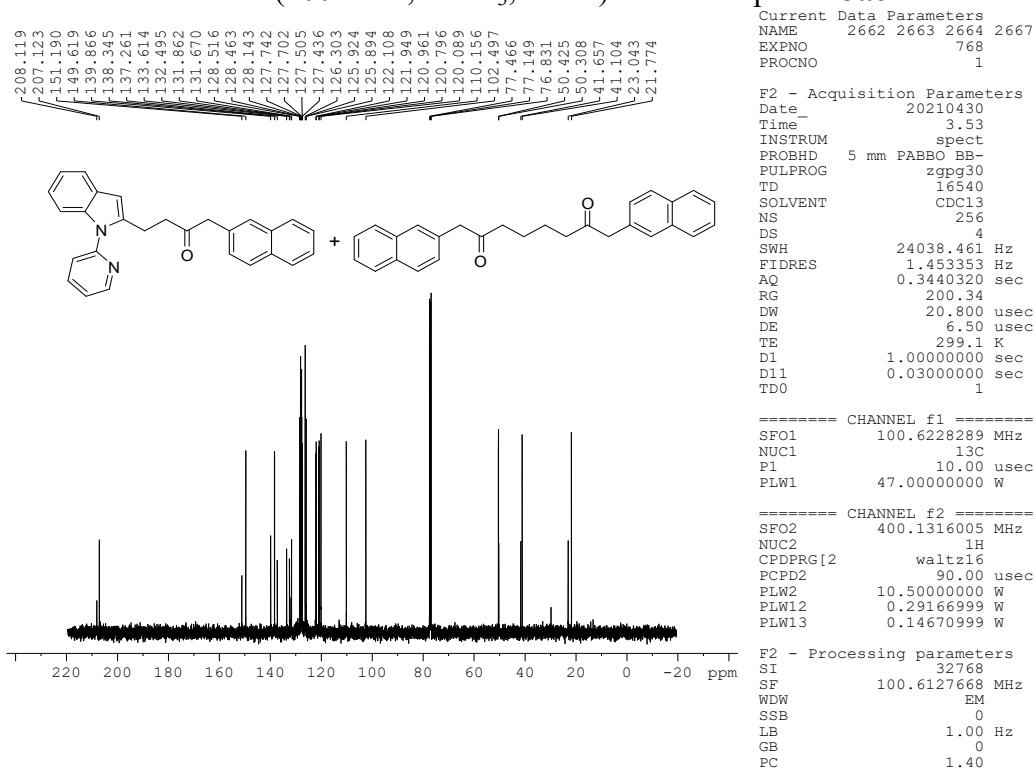

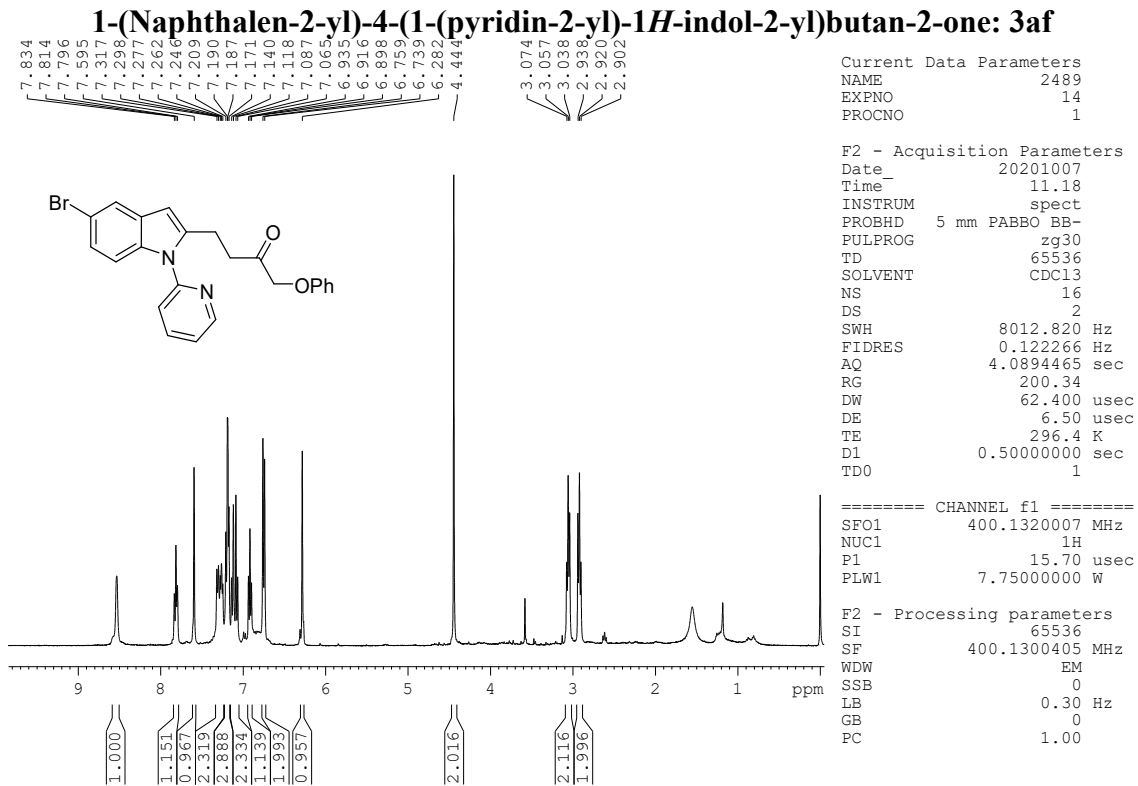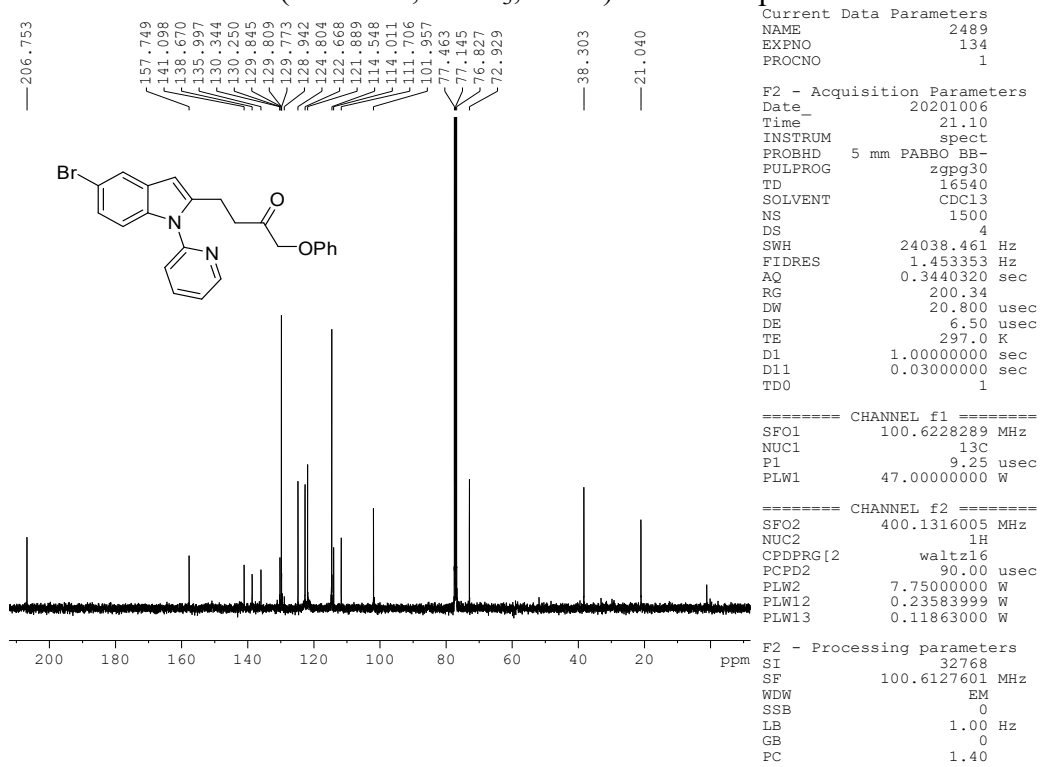



**1-(1-(Pyridin-2-yl)-1H-indol-2-yl)nonan-3-one: 3ag**

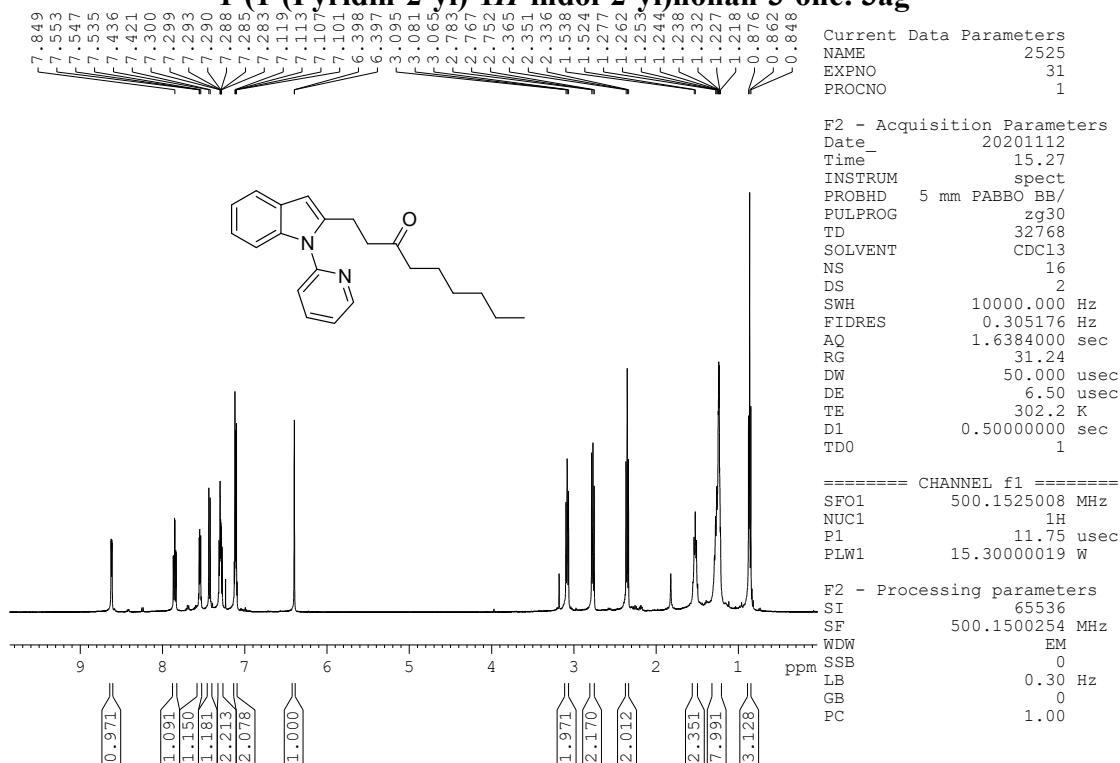

**<sup>1</sup>H NMR (400 MHz, CDCl<sub>3</sub>, 24 °C) of the compound 3ag**

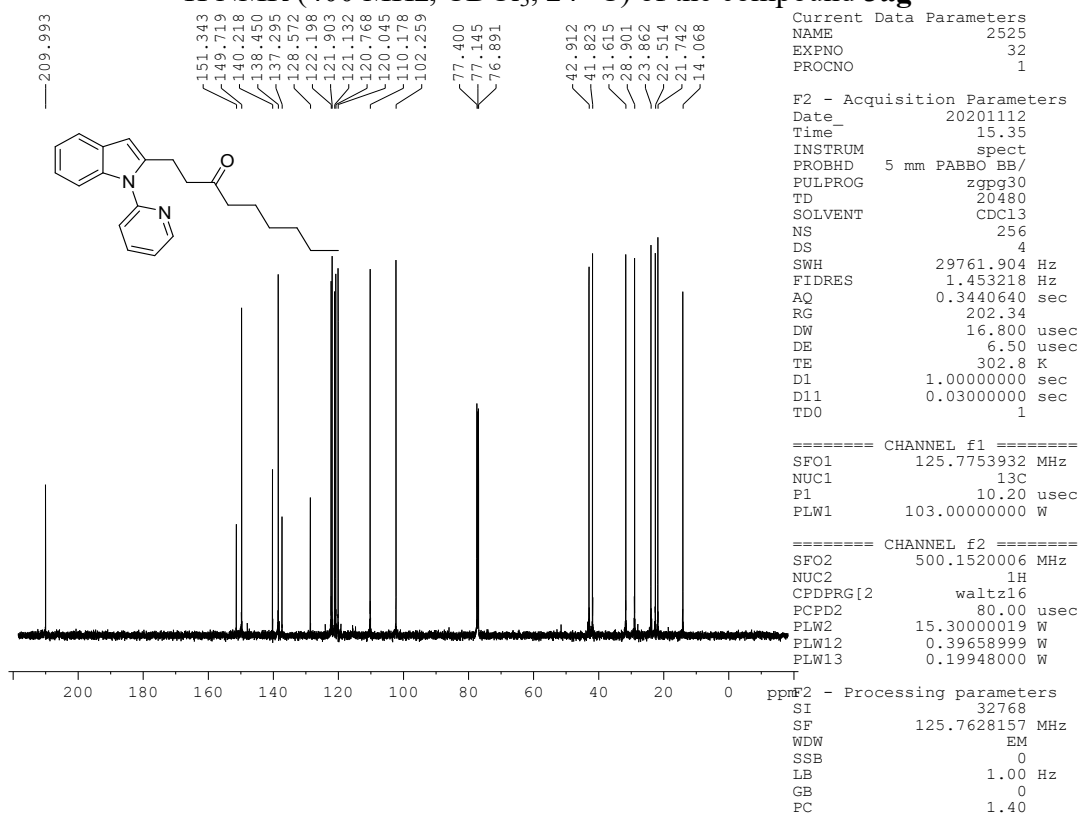

**<sup>13</sup>C{<sup>1</sup>H} NMR (100 MHz, CDCl<sub>3</sub>, 24 °C) of the compound 3ag**

**1-((3r,5r,7r)-Adamantan-1-yl)-3-(1-(pyridin-2-yl)-1H-indol-2-yl)propan-1-one: 3ah**

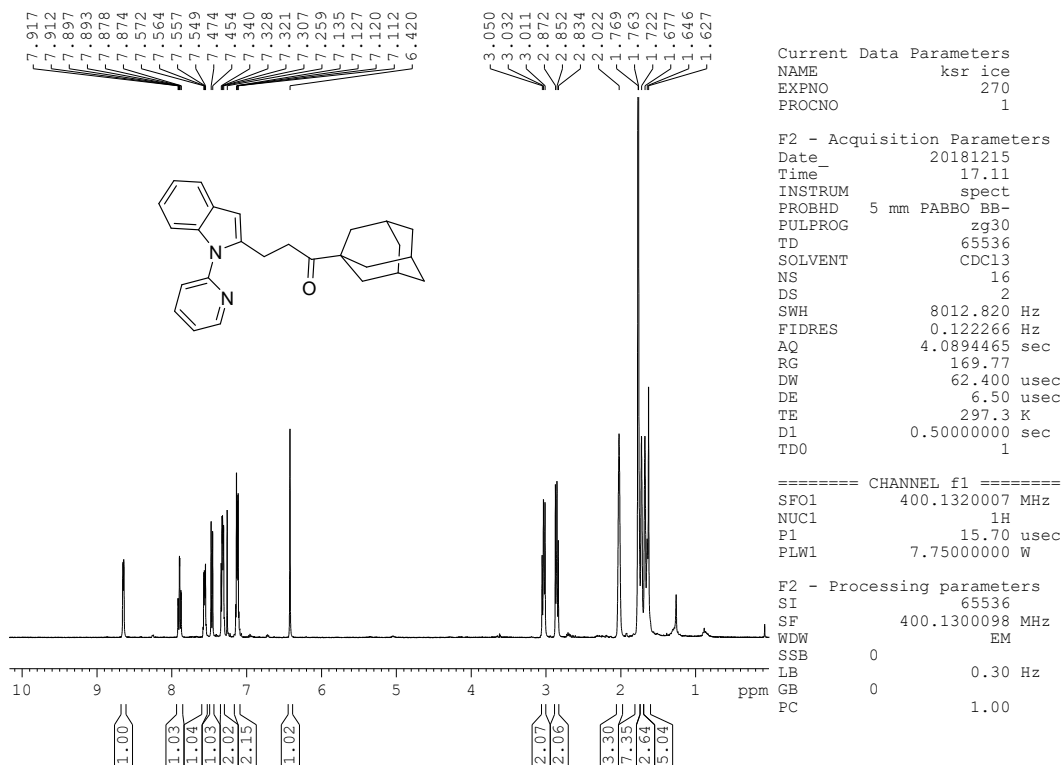

<sup>1</sup>H NMR (400 MHz, CDCl<sub>3</sub>, 24 °C) of the compound **3ah**

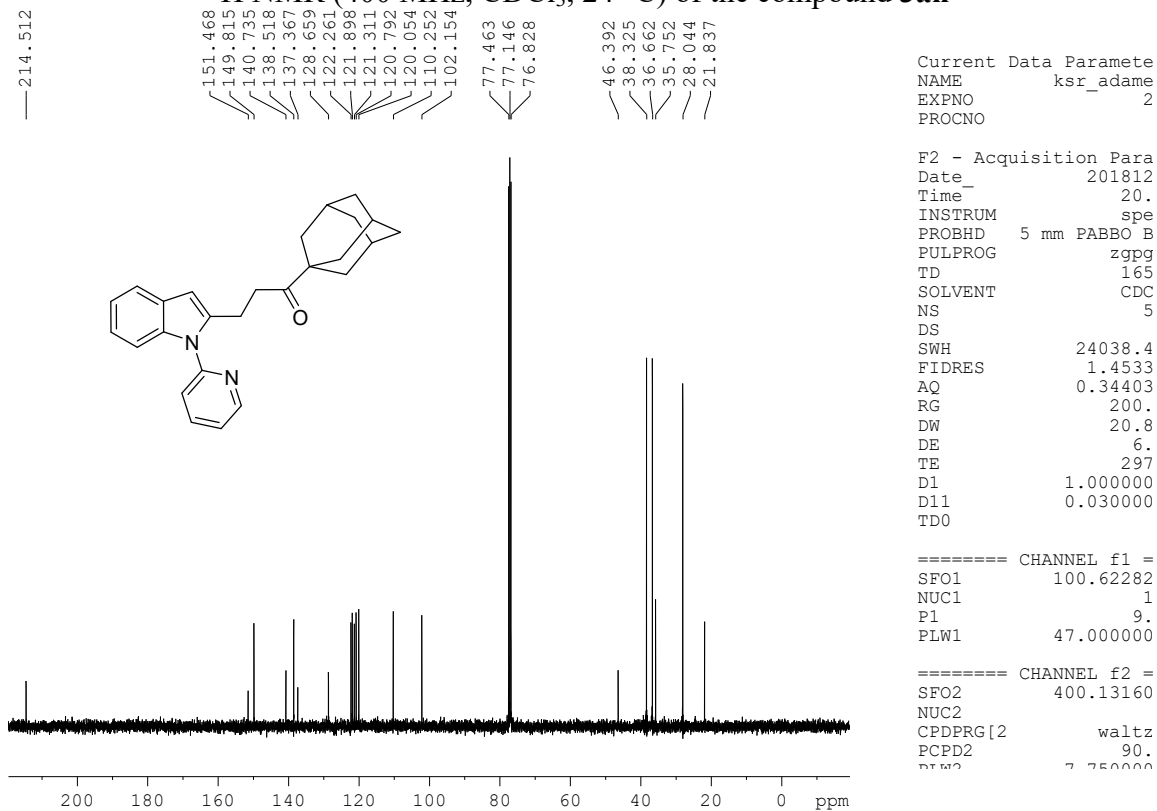

<sup>13</sup>C{<sup>1</sup>H} NMR (100 MHz, CDCl<sub>3</sub>, 24 °C) of the compound **3ah**

**1-(4-(*tert*-Butyl)phenyl)-3-(1-(pyrimidin-2-yl)-1*H*-indol-2-yl)propan-1-one: 3ai**

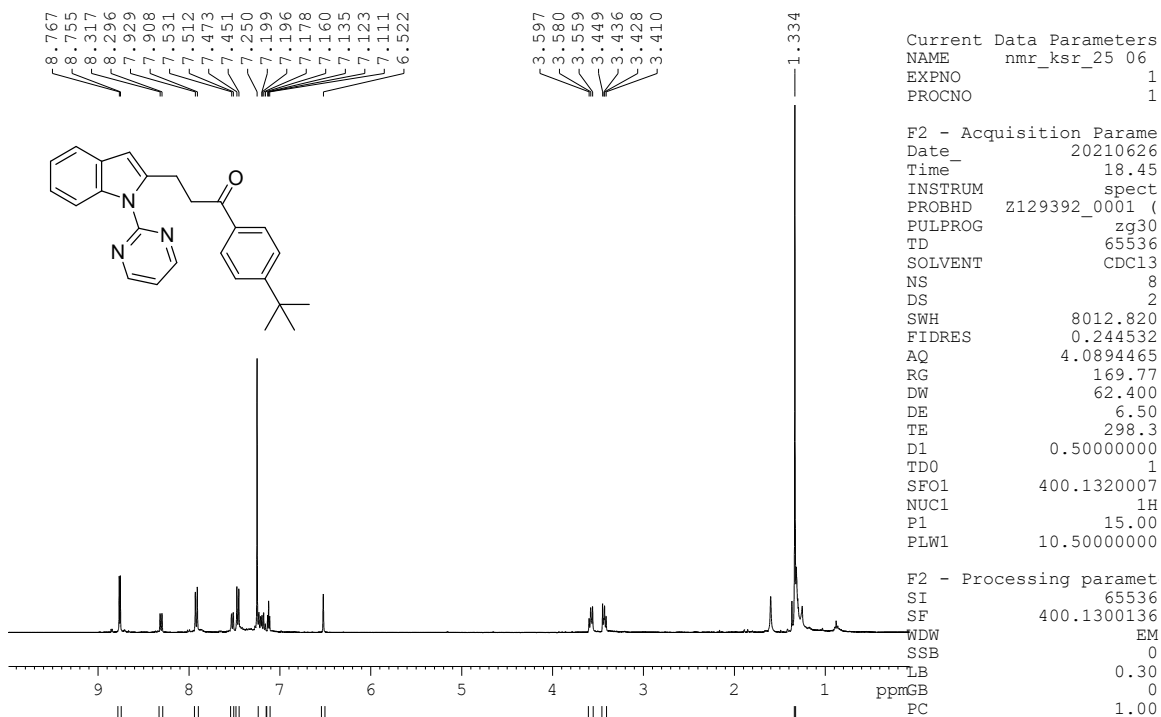

**<sup>1</sup>H NMR (400 MHz, CDCl<sub>3</sub>, 24 °C) of the compound 3ai**

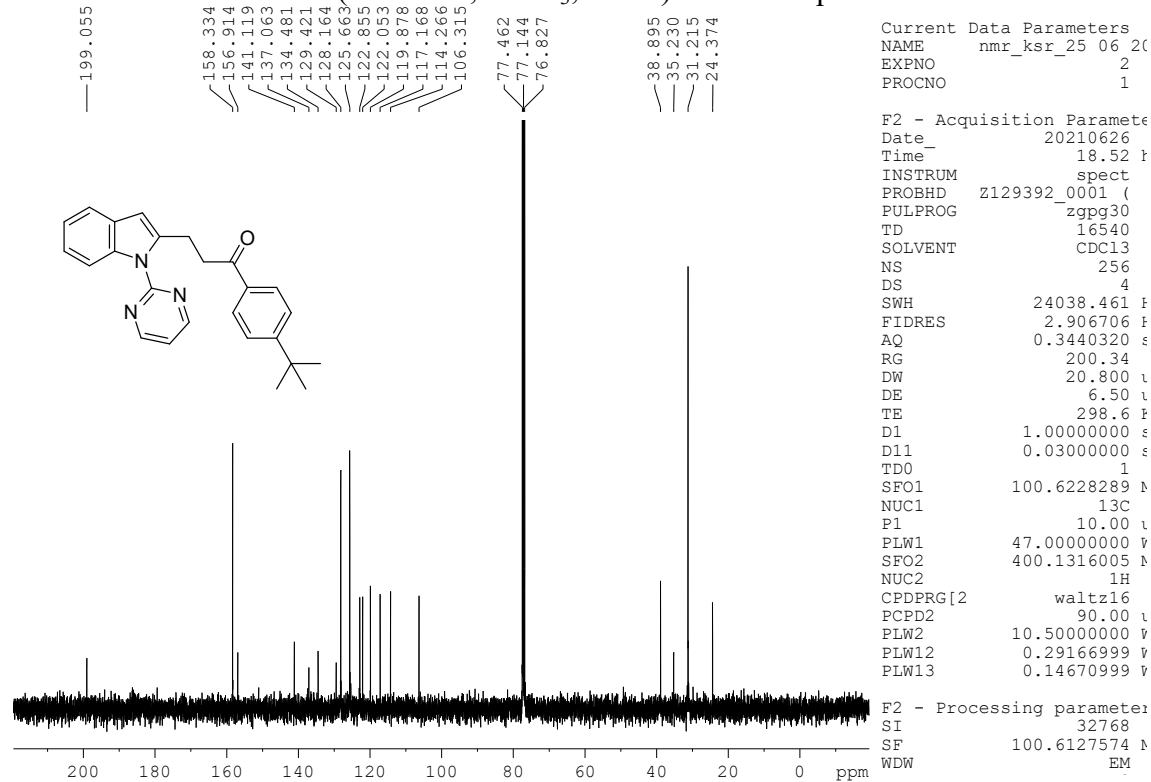

**<sup>13</sup>C {<sup>1</sup>H} NMR (100 MHz, CDCl<sub>3</sub>, 24 °C) of the compound 3ai**

**1-(4-(Phenoxymethyl)phenyl)-3-(1-(pyrimidin-2-yl)-1H-indol-2-yl)propan-1-one: 3aj**

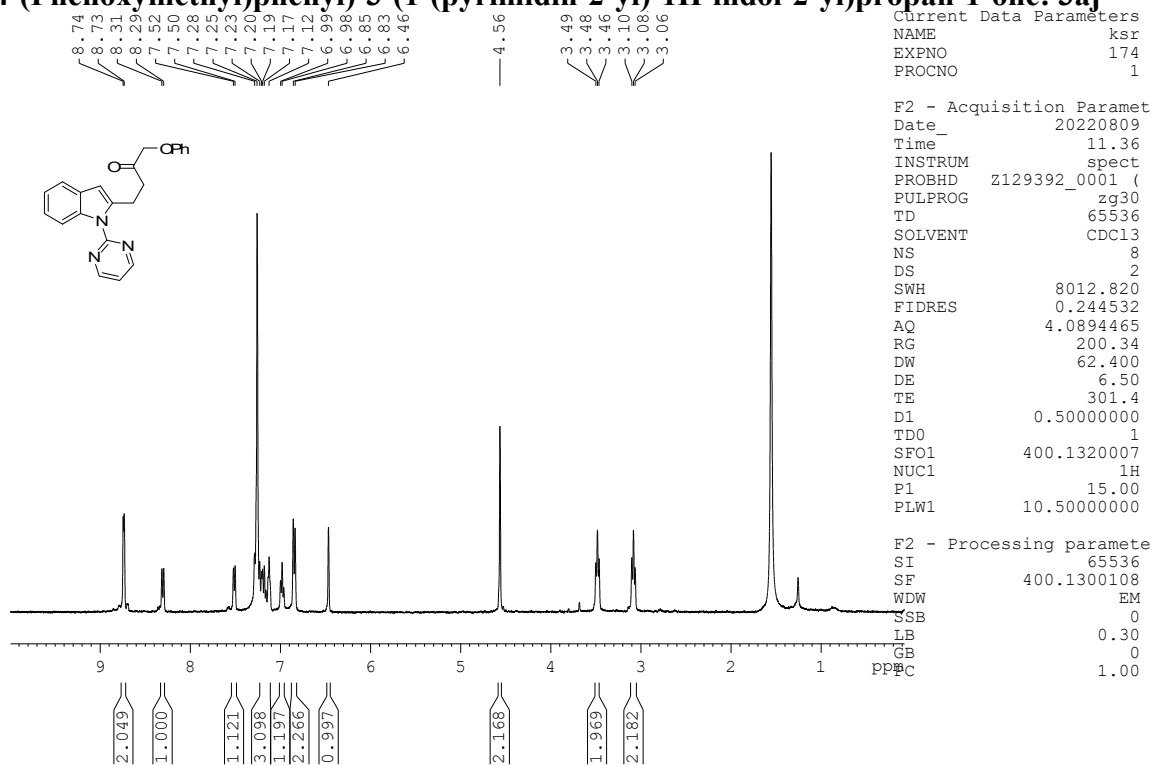

**<sup>1</sup>H NMR (400 MHz, CDCl<sub>3</sub>, 24 °C) of the compound 3aj**

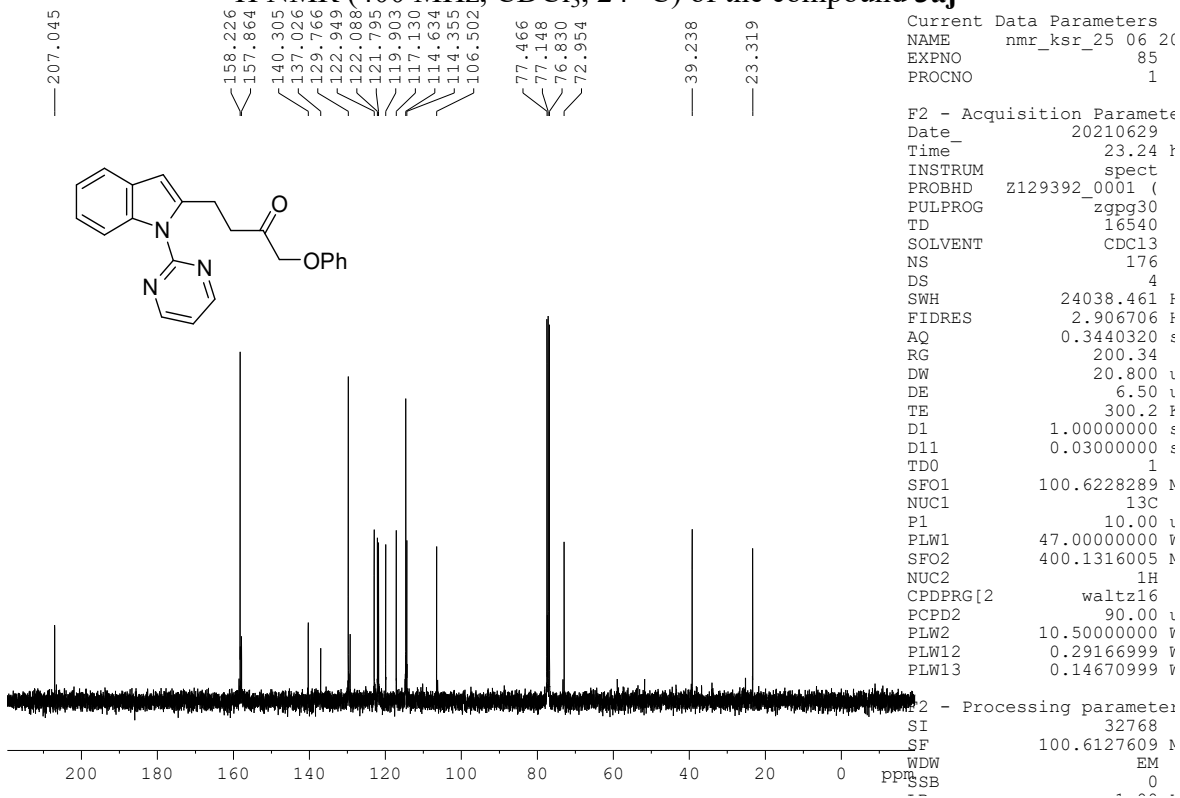

**<sup>13</sup>C{<sup>1</sup>H} NMR (100 MHz, CDCl<sub>3</sub>, 24 °C) of the compound 3aj**

**1-Phenyl-3-(1-(pyridin-2-yl)indolin-7-yl)propan-1-one: 3k**

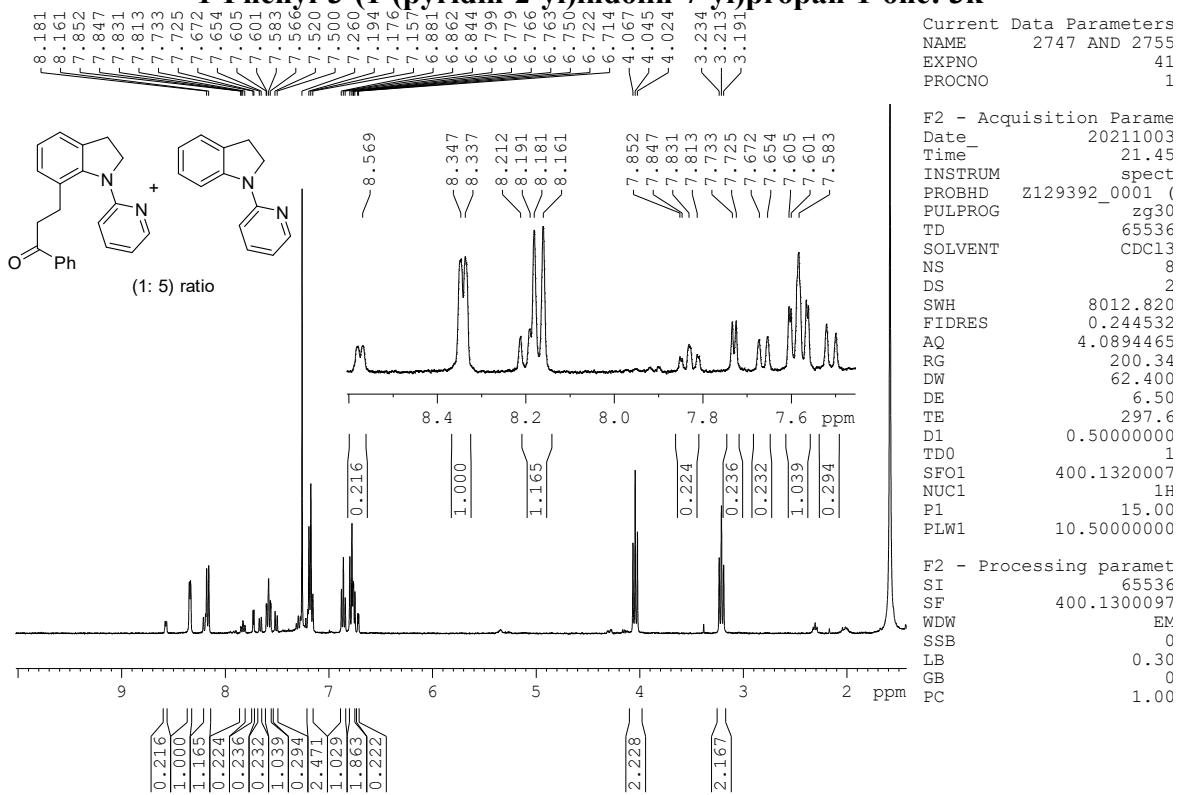

<sup>1</sup>H NMR (400 MHz, CDCl<sub>3</sub>, 24 °C) of the compound **3k**

**2-(3,3-Diphenylallyl)-1-(pyridin-2-yl)-1H-indole (6)**

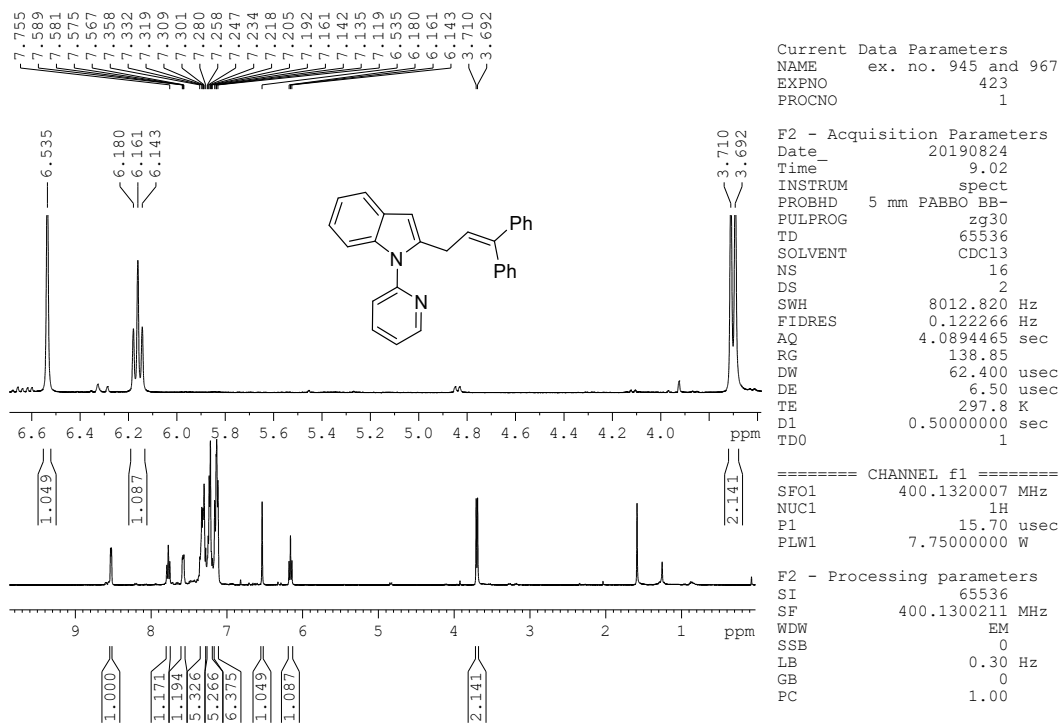

**<sup>1</sup>H NMR (400 MHz, CDCl<sub>3</sub>, 24 °C) of the compound 6**

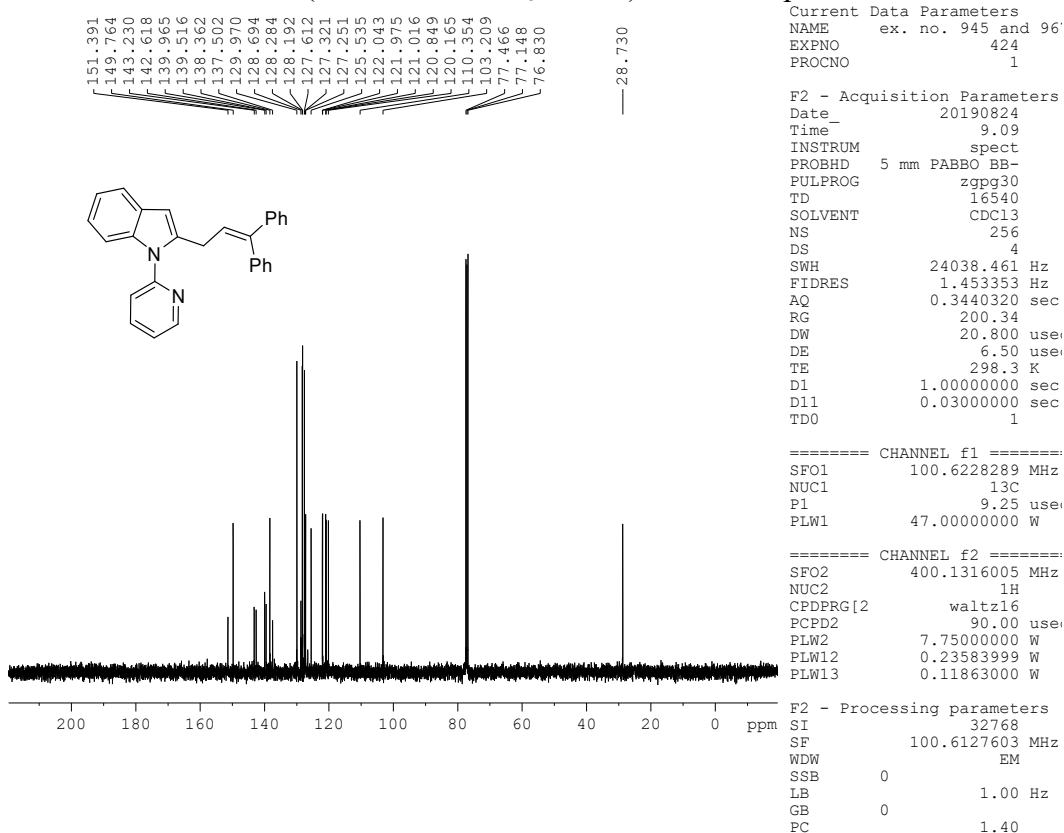

**<sup>13</sup>C{<sup>1</sup>H} NMR (100 MHz, CDCl<sub>3</sub>, 24 °C) of the compound 6**

**1-(4-(Phoxymethyl)phenyl)-3-(1-(pyrimidin-2-yl)-1H-indol-2-yl)propan-1-one (7):**

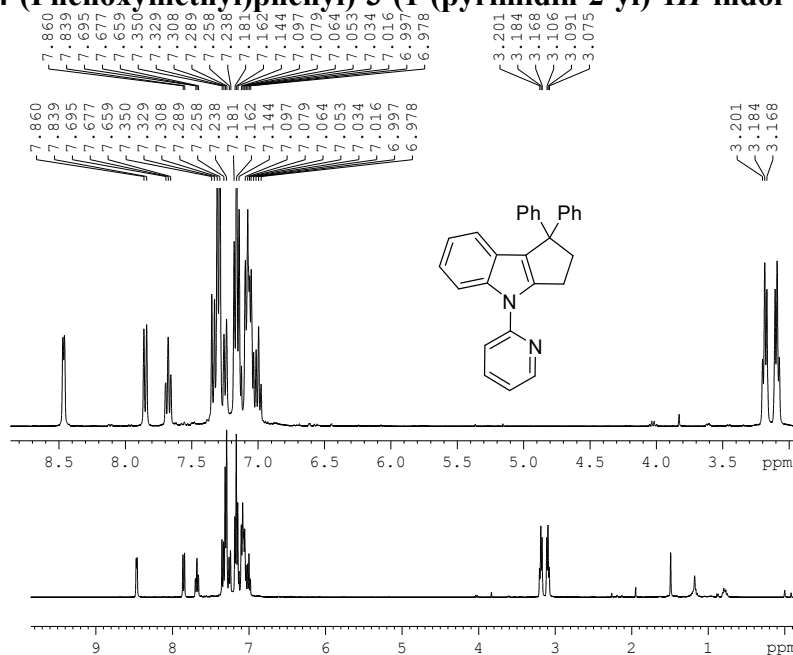

Current Data Parameters  
 NAME 1859 application parent d  
 EXPNO 426  
 PROCNO 1

F2 - Acquisition Parameters  
 Date\_ 20190824  
 Time\_ 9.16  
 INSTRUM spect  
 PROBHD 5 mm PABBO BB-  
 PULPROG zg30  
 TD 65536  
 SOLVENT CDCl3  
 NS 16  
 DS 2  
 SWH 8012.820 Hz  
 FIDRES 0.122266 Hz  
 AQ 4.0894465 sec  
 RG 95.73  
 DW 62.400 usec  
 DE 6.50 usec  
 TE 297.9 K  
 D1 0.50000000 sec  
 TD0 1

===== CHANNEL f1 =====  
 SFO1 400.1320007 MHz  
 NUC1 1H  
 P1 15.70 usec  
 PLW1 7.75000000 W

F2 - Processing parameters  
 SI 65536  
 SF 400.1300634 MHz  
 WDW EM  
 SSB 0  
 LB 0.30 Hz  
 GB 0  
 PC 1.00

**<sup>1</sup>H NMR (400 MHz, CDCl<sub>3</sub>, 24 °C) of the compound 7**

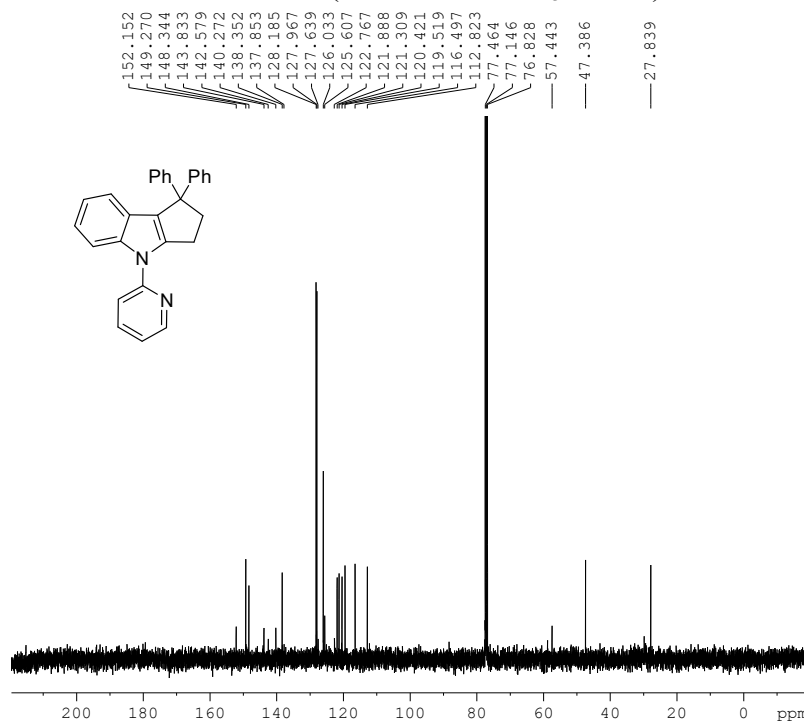

Current Data Parameters  
 NAME nmr\_1440 p1  
 EXPNO 292  
 PROCNO 1

F2 - Acquisition Parameters  
 Date\_ 20180815  
 Time\_ 12.47  
 INSTRUM spect  
 PROBHD 5 mm PABBO BB-  
 PULPROG zgpg30  
 TD 16540  
 SOLVENT CDCl3  
 NS 256  
 DS 4  
 SWH 24038.461 Hz  
 FIDRES 1.453353 Hz  
 AQ 0.3440320 sec  
 RG 200.34  
 DW 20.800 usec  
 DE 6.50 usec  
 TE 295.7 K  
 D1 1.00000000 sec  
 D11 0.03000000 sec  
 TD0 1

===== CHANNEL f1 =====  
 SFO1 100.6228289 MHz  
 NUC1 13C  
 P1 9.25 usec  
 PLW1 47.00000000 W

===== CHANNEL f2 =====  
 SFO2 400.1316005 MHz  
 NUC2 1H  
 CPDPRG[2] waltz16  
 PCPD2 90.00 usec  
 PLW2 7.75000000 W  
 PLW12 0.23583999 W  
 PLW13 0.11863000 W

F2 - Processing parameters  
 SI 32768  
 SF 100.6127579 MHz  
 WDW EM  
 SSB 0  
 LB 1.00 Hz  
 GB 0  
 PC 1.40

**<sup>13</sup>C{<sup>1</sup>H} NMR (100 MHz, CDCl<sub>3</sub>, 24 °C) of the compound 7**

# 1-Phenyl-4-(pyridin-2-yl)-1,2,3,4-tetrahydrocyclopenta[b]indole 9

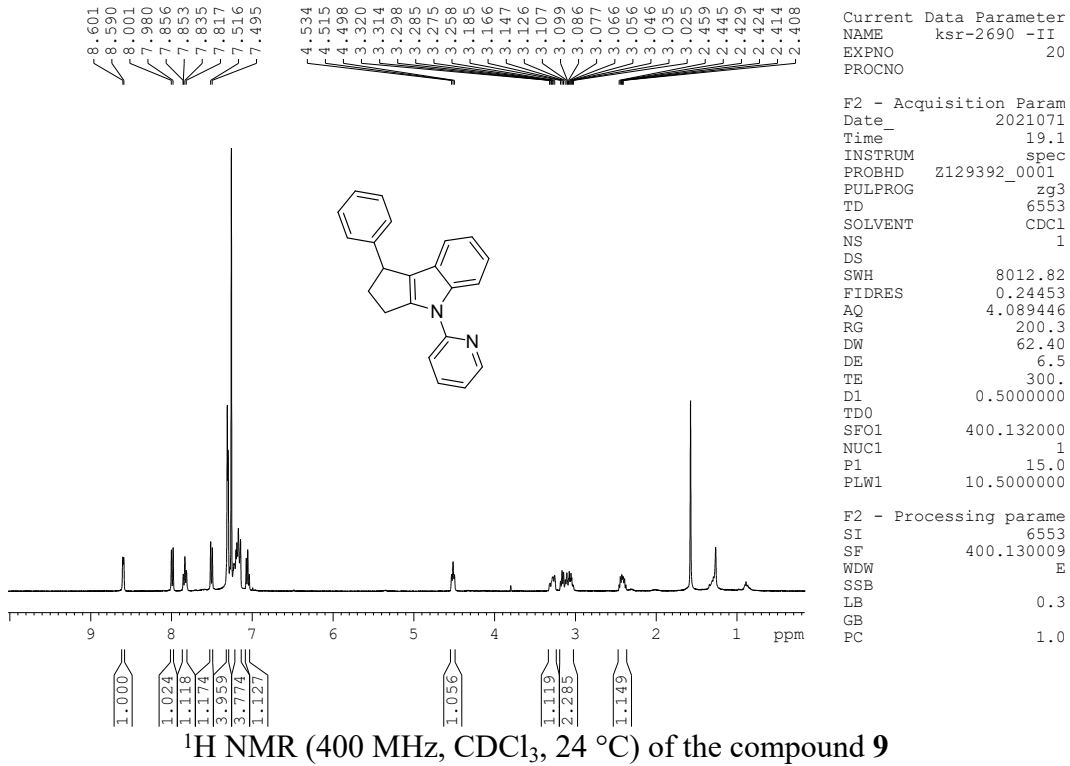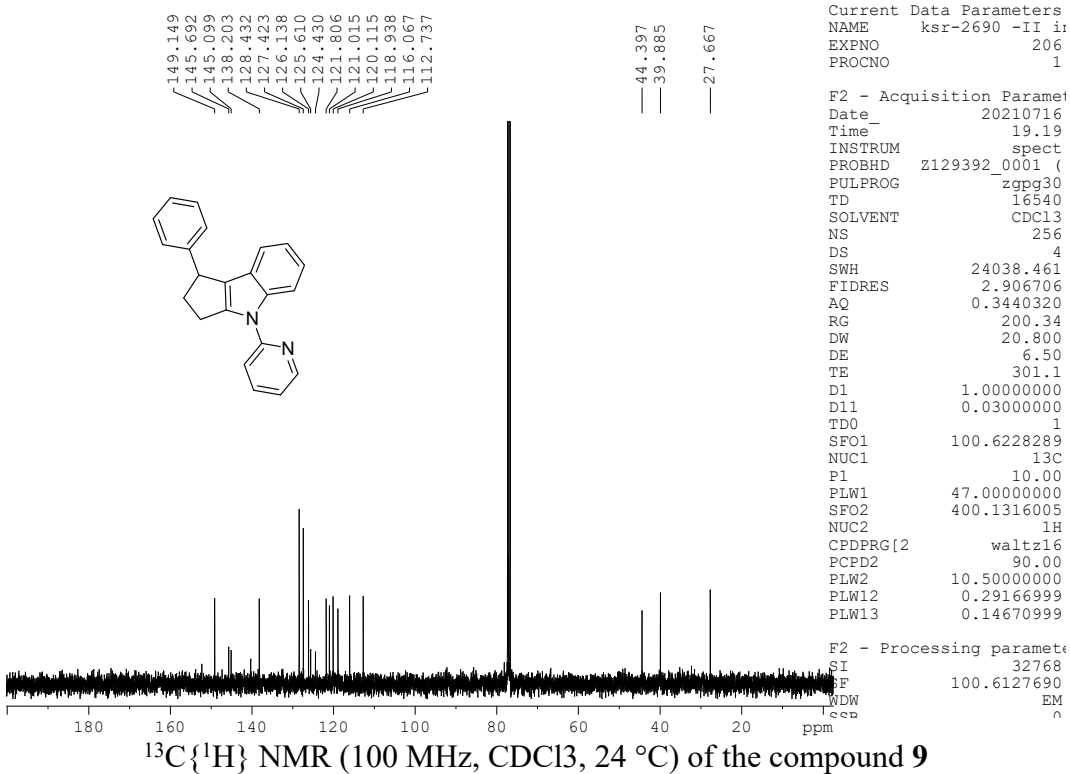



**1,6-Diphenylhexane-1,6-dione (4a)**

<sup>1</sup>H NMR (400 MHz, CDCl<sub>3</sub>, 24 °C) of compound 4a

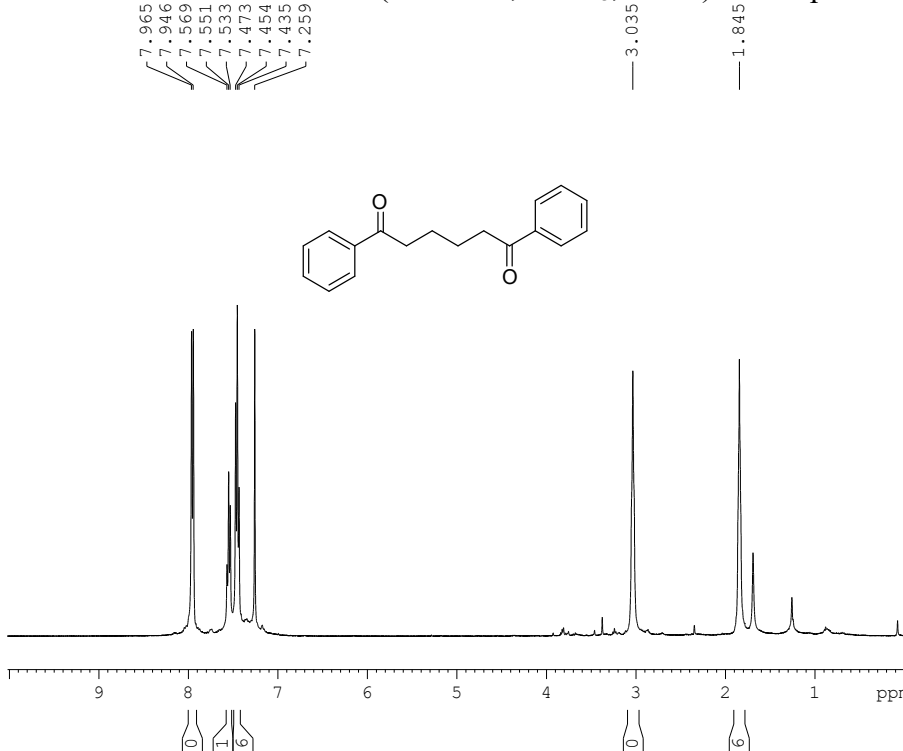

Current Data Parameters  
 NAME 2689 p1 and p2  
 EXPNO 100  
 PROCNO 1

F2 - Acquisition Parameters  
 Date\_ 20210708  
 Time 19.27  
 INSTRUM spect  
 PROBHD Z129392\_0001 ( )  
 PULPROG zg30  
 TD 65536  
 SOLVENT CDCl3  
 NS 16  
 DS 2  
 SWH 8012.820  
 FIDRES 0.244532  
 AQ 4.0894465  
 RG 153.13  
 DW 62.400  
 DE 6.50  
 TE 301.1  
 D1 0.50000000  
 TD0 1  
 SFO1 400.1320007  
 NUC1 1H  
 P1 15.00  
 PLW1 10.50000000

F2 - Processing parameters  
 SI 65536  
 SF 400.1300096  
 WDW EM  
 SSB C  
 LB 0.30  
 GB C  
 PC 1.00

<sup>13</sup>C {<sup>1</sup>H} NMR (100 MHz, CDCl<sub>3</sub>, 24 °C) of compound 4a

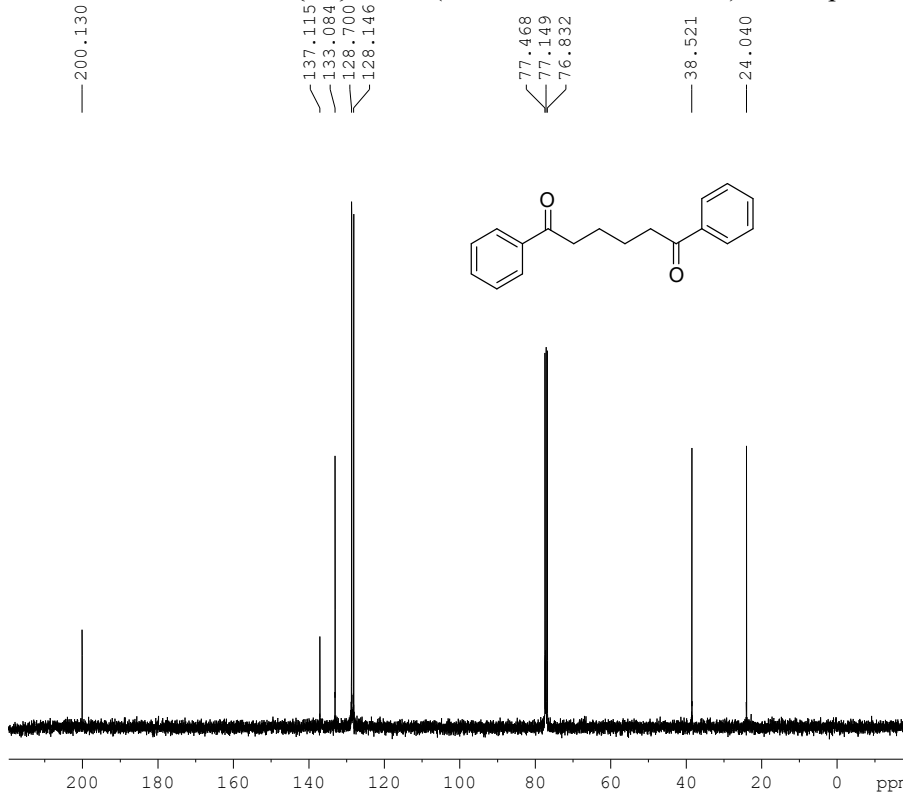

Current Data Parameters  
 NAME 2689 p1 and p2  
 EXPNO 101  
 PROCNO 1

F2 - Acquisition Parameters  
 Date\_ 20210708  
 Time 19.33  
 INSTRUM spect  
 PROBHD Z129392\_0001 ( )  
 PULPROG zgpg30  
 TD 16540  
 SOLVENT CDCl3  
 NS 256  
 DS 4  
 SWH 24038.461  
 FIDRES 2.906706  
 AQ 0.3440320  
 RG 200.34  
 DW 20.800  
 DE 6.50  
 TE 301.5  
 D1 1.00000000  
 D11 0.03000000  
 TD0 1  
 SFO1 100.6228289  
 NUC1 13C  
 P1 10.00  
 PLW1 47.00000000  
 SFO2 400.1316005  
 NUC2 1H  
 CPDPRG[2] waltz16  
 PCPD2 90.00  
 PLW2 10.50000000  
 PLW12 0.29166999  
 PLW13 0.14670999

F2 - Processing parameters  
 SI 32768  
 SF 100.6127579  
 WDW EM  
 SSB C

**Propiophenone:**

<sup>1</sup>H NMR (400 MHz, CDCl<sub>3</sub>, 24 °C):

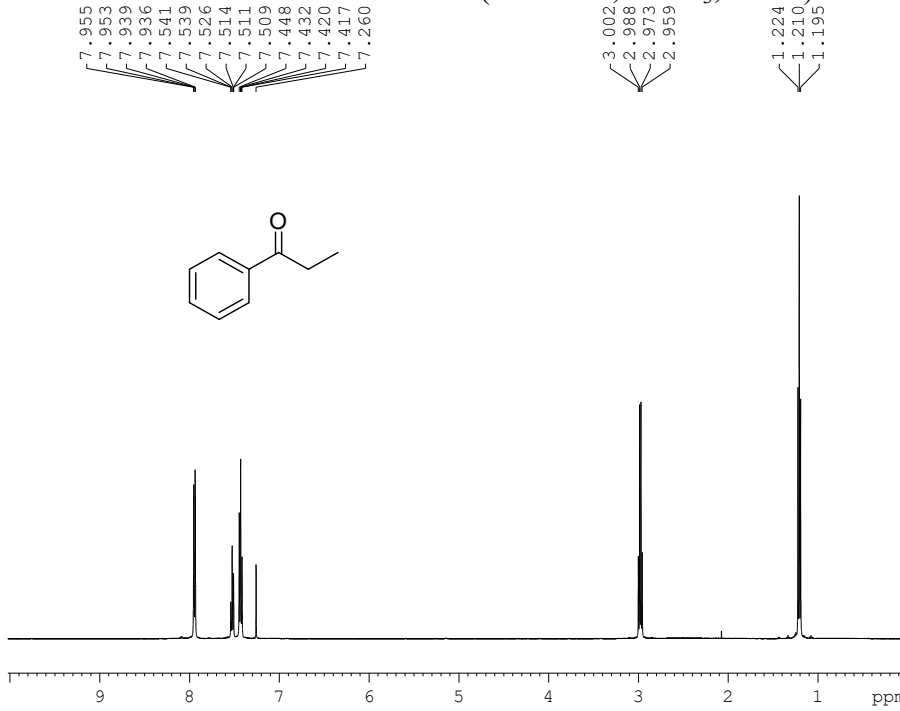

Current Data Parameters  
 NAME spa  
 EXPNO 66  
 PROCNO 1

F2 - Acquisition Parameters  
 Date\_ 20211026  
 Time\_ 16.18  
 INSTRUM spect  
 PROBHD 5 mm PABBO BB/  
 PULPROG zg30  
 TD 32768  
 SOLVENT CDCl3  
 NS 8  
 DS 2  
 SWH 10000.000  
 FIDRES 0.305176  
 AQ 1.6384000  
 RG 31.24  
 DW 50.000  
 DE 6.50  
 TE 299.7  
 D1 0.5000000  
 TD0 1

==== CHANNEL f1 ====  
 SFO1 500.1525008  
 NUC1 1H  
 P1 11.75  
 PLW1 15.30000019

F2 - Processing parameters  
 SI 65536  
 SF 500.1500112  
 WDW EM  
 SSB C  
 LB 0.30  
 GB C  
 PC 1.00

<sup>13</sup>C {<sup>1</sup>H} NMR (100 MHz, CDCl<sub>3</sub>, 24 °C):

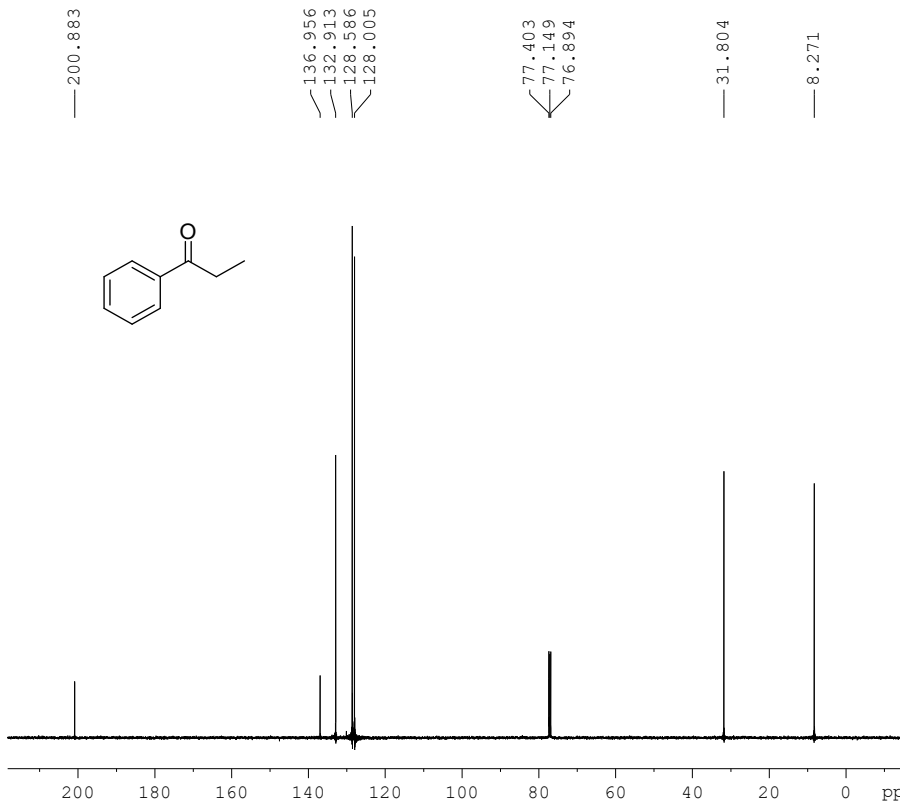

Current Data Parameters  
 NAME spa  
 EXPNO 66  
 PROCNO 1

F2 - Acquisition Parameters  
 Date\_ 20211026  
 Time\_ 16.24  
 INSTRUM spect  
 PROBHD 5 mm PABBO BB/  
 PULPROG zgpg30  
 TD 20480  
 SOLVENT CDCl3  
 NS 150  
 DS 4  
 SWH 29761.904  
 FIDRES 1.453218  
 AQ 0.3440640  
 RG 202.34  
 DW 16.800  
 DE 6.50  
 TE 300.4  
 D1 1.0000000  
 D11 0.0300000  
 TD0 1

==== CHANNEL f1 ====  
 SFO1 125.7753932  
 NUC1 13C  
 P1 10.20  
 PLW1 103.0000000

==== CHANNEL f2 ====  
 SFO2 500.1520006  
 NUC2 1H  
 CPDPRG[2] waltz16  
 PCPD2 80.00  
 PLW2 15.30000019  
 PLW12 0.39658999  
 PLW13 0.19948000

F2 - Processing parameters  
 SI 32768
